# Supplementary material for: Phosphazene-catalyzed desymmetrization of cyclohexadienones by dithiane addition
Source: publisher site journal article supplement (doi:10.3762/bjoc.13.75), 2017-04-24

**Supporting Information**  
**for**  
**Phosphazene-catalyzed desymmetrization of cyclohexadienones**  
**by dithiane addition**

Matthew A. Horwitz<sup>†</sup>, Elisabetta Massolo<sup>†</sup> and Jeffrey S. Johnson\*

Address: Department of Chemistry, University of North Carolina at Chapel Hill, Chapel Hill, NC 27599-3290, USA

<sup>†</sup>These authors contributed equally to this work.

Email: Jeffrey S. Johnson - [jsj@unc.edu](mailto:jsj@unc.edu)

\*Corresponding author

**Experimental procedures, characterization data and copies of  
<sup>1</sup>H and <sup>13</sup>C NMR spectra for final compounds**

| <b>Table of Contents</b>                                            | <b>Page</b> |
|---------------------------------------------------------------------|-------------|
| General information (materials and methods)                         | S2          |
| General procedure for substrate synthesis                           | S3          |
| Characterization of substrates                                      | S4–S5       |
| General procedure for intramolecular conjugate addition of dithiane | S6          |
| Characterization of products                                        | S6–S8       |
| Procedure for the Luche reduction of enone                          | S9          |
| Characterization of Luche reduction product                         | S9          |
| Procedure for 1,2-addition of AlMe <sub>3</sub>                     | S9          |
| Characterization of product of 1,2-addition of AlMe <sub>3</sub>    | S9          |
| References                                                          | S10         |
| Crude <sup>1</sup> H NMR spectra                                    | S11–S18     |
| <sup>1</sup> H and <sup>13</sup> C NMR spectra of new compounds     | S19–S50     |

## General information:

**Methods:** Infrared (IR) spectra were obtained using an ASI ReactIR 1000 Fourier transform infrared spectrometer. Proton and carbon magnetic resonance spectra ( $^1\text{H}$  NMR,  $^{13}\text{C}$  NMR,  $^{19}\text{F}$  NMR and  $^{31}\text{P}$  NMR) were recorded on a Bruker model DRX 400 or 600 ( $^1\text{H}$  NMR at 400 MHz or 600 MHz,  $^{13}\text{C}$  NMR at 101 MHz or 151 MHz, or a Bruker AVANCE III-OneBay500 ( $^{13}\text{C}$  NMR at 235 MHz) spectrometer with solvent resonance as the internal standard ( $^1\text{H}$  NMR:  $\text{CDCl}_3$  at 7.26 ppm and  $^{13}\text{C}$  NMR:  $\text{CDCl}_3$  at 77.0 ppm).  $^1\text{H}$  NMR data are reported as follows: chemical shift, multiplicity (s = singlet, br-s = broad singlet, d = doublet, dd = doublet of doublet, t = triplet, td = triplet of doublet, m = multiplet), coupling constants (Hz), and integration. High resolution mass spectra were obtained with a Thermo Fisher Scientific Exactive or Finnigan<sup>TM</sup> LTQ-ICR FT<sup>TM</sup> (all samples prepared in methanol). Melting points were obtained using a Thomas Hoover UniMelt Capillary Melting Point Apparatus. Analytical thin layer chromatography was carried out using Whatman 0.25 mm silica gel 60 plates, Sorbent Technologies 0.20 mm Silica Gel TLC plates. Visualization was allowed by UV light, phosphomolybdic acid in ethanol, or aqueous ceric ammonium nitrate solution. Purification of the reaction products was carried out by using Siliacflash-P60 silica gel (40–63  $\mu\text{m}$ ) purchased from Silicycle. Yields refer to isolated yields after flash column chromatography. Since all results are the averages of two trials, the yields listed in the paper may not exactly match those listed below.

**Materials:** THF and DCM were purified by passing the solvent through a column of aluminum oxide under nitrogen. Dearomatization of phenol derivatives was carried out according to literature procedures.<sup>1</sup> 1,3-Dithiane-2-carboxylic acid was prepared according to literature procedure.<sup>2</sup> Phosphazene base  $\text{P}_2$ -*t*-Bu solution (~2.0 M in THF) and DMAP were purchased from Sigma-Aldrich and used as received. (Diacetoxyiodo)benzene, [bis(trifluoroacetoxy)iodo]benzene, and DCC were purchased from Oakwood Chemical and used as received.

### General procedure for substrate synthesis:

The substrates were prepared through a two-step synthesis on gram scale.

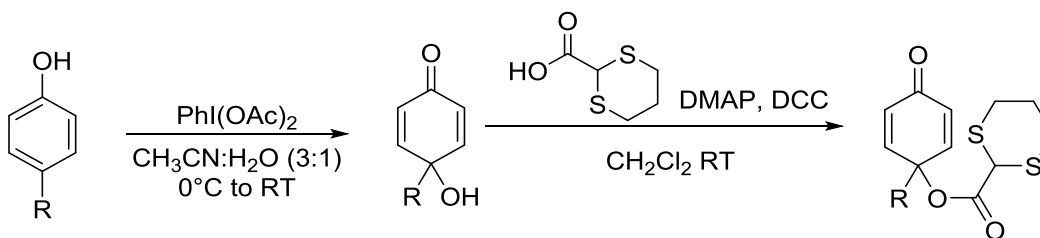

#### STEP 1 – Dearomatization of phenols<sup>1</sup>

The phenol (1 equiv) was dissolved in MeCN (3 mL for 1 mmol) and  $\text{H}_2\text{O}$  (1 mL for 1 mmol); the solution was cooled to  $0^\circ\text{C}$  and  $\text{PhI}(\text{OAc})_2$  (1.1 equiv) was slowly added as a solid. The reaction mixture was allowed stirred at ambient temperature for 18 h. The mixture was diluted with EtOAc and washed with water and brine. The combined organic phases were dried over  $\text{Na}_2\text{SO}_4$  and the solvent was removed under reduced pressure. The crude materials thusly obtained were purified using flash column chromatography on silica gel.

#### STEP 2 – DCC coupling between *para*-quinols and 1,3-dithiane-2-carboxylic acid

The desired *p*-quinols (1 equiv) and 1,3-dithiane-2-carboxylic acid (1.5 equiv) were dissolved in  $\text{CH}_2\text{Cl}_2$  ( $[\text{quinol}]_0 = 1.0\text{ M}$ ); 4-dimethylaminopyridine (DMAP) (1 equiv) was then added to the mixture. The reaction mixture was cooled to  $0^\circ\text{C}$  and *N,N'*-dicyclohexylcarbodiimide (DCC) (1.1 equiv) was added. The reaction mixture was allowed to warm to rt and stirred for 18 h. After that period, the mixture was filtered through a short plug of silica gel and washed with  $\text{CH}_2\text{Cl}_2$ . The solvent was removed under reduced pressure. The crude materials thusly obtained were purified using flash column chromatography on silica gel.

## Characterization of substrates:

### 1-Methyl-4-oxocyclohexa-2,5-dien-1-yl 1,3-dithiane-2-carboxylate (1a):

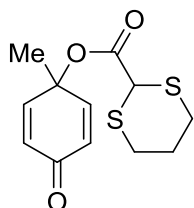

The title compound was obtained in 61% yield.

White solid, mp 88-90 °C;  $^1\text{H NMR}$  (600 MHz,  $\text{CDCl}_3$ )  $\delta$  6.96 (d,  $J$  = 10.2 Hz, 2H), 6.31 (d,  $J$  = 10.2 Hz, 2H), 4.12 (s, 1H), 3.43-3.39 (m, 2H), 2.61-2.57 (m, 2H), 2.19-2.14 (m, 1H), 2.06-1.99 (m, 1H), 1.62 (s, 3H);  $^{13}\text{C NMR}$  (151 MHz,  $\text{CDCl}_3$ )  $\delta$  184.8, 168.3, 148.6, 128.5, 75.3, 39.0, 26.4, 25.5, 24.8; **IR** (thin film)  $\nu$  2931, 1735, 1667, 1631, 1608, 1393, 1285, 1138, 1052, 857  $\text{cm}^{-1}$ ; **HRMS** (ESI): Calcd. For  $\text{C}_{12}\text{H}_{14}\text{NaO}_3\text{S}_2^+$  ( $[\text{M}+\text{Na}^+]$ ): 293.0277, found 293.0275; **TLC** (1:4 EtOAc/hexanes):  $R_f$  = 0.33.

### 1-Ethyl-4-oxocyclohexa-2,5-dien-1-yl 1,3-dithiane-2-carboxylate (1b):

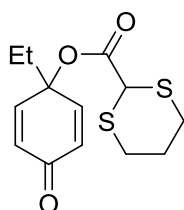

The title compound was obtained in 49% yield.

Yellow oil;  $^1\text{H NMR}$  (600 MHz,  $\text{CDCl}_3$ )  $\delta$  6.88 (d,  $J$  = 10.2 Hz, 2H), 6.36 (d,  $J$  = 10.2 Hz, 2H), 4.14 (s, 1H), 3.40 (ddd,  $J$  = 14.3, 12.2, 2.5 Hz, 1H), 2.60-2.57 (m, 1H), 2.18-2.14 (m, 1H), 2.06-1.99 (m, 1H), 1.94 (q,  $J$  = 7.5 Hz, 1H), 0.94 (t,  $J$  = 7.5 Hz, 2H).  $^{13}\text{C NMR}$  (151 MHz,  $\text{CDCl}_3$ )  $\delta$  185.1, 168.3, 147.6, 129.6, 78.4, 39.2, 32.2, 25.5, 24.8, 7.7; **IR** (thin film)  $\nu$  2935, 1736, 1667, 1631, 1282, 1138, 1063, 995, 915, 853  $\text{cm}^{-1}$ ; **HRMS** (ESI): Calcd. For  $\text{C}_{13}\text{H}_{16}\text{NaO}_3\text{S}_2^+$  ( $[\text{M}+\text{Na}^+]$ ): 307.0433, found 307.0428; **TLC** (1:4 EtOAc/hexanes):  $R_f$  = 0.38.

### 1-(3-Methoxy-3-oxopropyl)-4-oxocyclohexa-2,5-dien-1-yl 1,3-dithiane-2-carboxylate (1c):

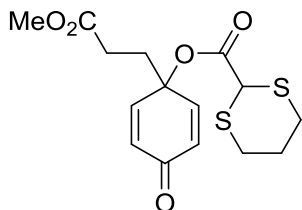

The title compound was obtained in 49% yield.

Light yellow solid, mp 79-80 °C;  $^1\text{H NMR}$  (600 MHz,  $\text{CDCl}_3$ )  $\delta$  6.85 (d,  $J$  = 10.2 Hz, 2H), 6.34 (d,  $J$  = 10.1 Hz, 2H), 4.10 (s, 1H), 3.66 (s, 3H), 3.39-3.34 (m, 2H), 2.58-2.54 (m, 2H), 2.36-2.33 (m, 2H), 2.26-2.23 (m, 2H), 2.16-2.12 (m, 1H), 2.04-1.97 (m, 1H).  $^{13}\text{C NMR}$  (151 MHz,  $\text{CDCl}_3$ )  $\delta$  184.6, 172.5, 168.0, 146.7, 129.9, 52.0, 39.0, 33.8, 28.1, 25.5, 24.8; **IR** (thin film)  $\nu$  2949, 2360, 1734, 1670, 1654, 1521, 1473, 1281, 1136, 990  $\text{cm}^{-1}$ ; **HRMS** (ESI): Calcd. For  $\text{C}_{15}\text{H}_{18}\text{NaO}_5\text{S}_2^+$  ( $[\text{M}+\text{Na}^+]$ ): 365.0488, found 365.0478; **TLC** (1:4 EtOAc/hexanes):  $R_f$  = 0.25.

### 1-(2-((*tert*-Butyldimethylsilyl)oxy)ethyl)-4-oxocyclohexa-2,5-dien-1-yl 1,3-dithiane-2-carboxylate (1d):

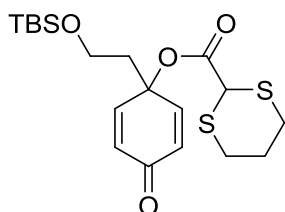

The title compound was obtained in 55% yield.

Clear oil;  $^1\text{H NMR}$  (600 MHz,  $\text{CDCl}_3$ )  $\delta$  6.98 (d,  $J$  = 10.2 Hz, 2H), 6.29 (d,  $J$  = 10.2 Hz, 2H), 4.11 (s, 1H), 3.75 (t,  $J$  = 9.0 Hz, 2H), 3.42-3.35 (m, 2H), 2.59-2.55 (m, 2H), 2.18-2.16 (m, 1H), 2.08 (t,  $J$  = 6.1 Hz, 2H), 2.04-1.95 (m, 1H), 0.87 (s, 9H), 0.03 (s, 6H).  $^{13}\text{C NMR}$  (151 MHz,  $\text{CDCl}_3$ )  $\delta$  185.1, 168.1, 147.9, 128.6, 57.7, 42.7,

39.2, 25.8, 25.5, 24.8, 18.1; **IR** (thin film)  $\nu$  2929, 2855, 1739, 1670, 1635, 1508, 1472, 1256, 1097, 838  $\text{cm}^{-1}$ ; **HRMS** (ESI): Calcd. For  $\text{C}_{19}\text{H}_{30}\text{NaO}_4\text{S}_2\text{Si}^+$  ( $[\text{M}+\text{Na}^+]$ ): 437.1247, found 437.1233; **TLC** (1:4 EtOAc/hexanes):  $R_f$  = 0.32.

#### 4-Oxo-[1,1'-biphenyl]-1(4H)-yl 1,3-dithiane-2-carboxylate (1e):

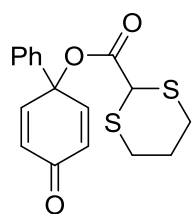

The title compound was obtained in 18% yield.

Orange solid, mp 113-114 °C;  **$^1\text{H}$  NMR** (600 MHz,  $\text{CDCl}_3$ )  $\delta$  7.41-7.46 (m, 2H), 7.41-7.34 (m, 3H), 7.06 (d,  $J$  = 10.1 Hz, 2H), 6.38 (d,  $J$  = 10.1 Hz, 2H), 4.26 (s, 1H), 3.37 (td,  $J$  = 12.0, 6.1 Hz, 2H), 2.60-2.57 (m, 2H), 2.15-2.12 (m, 1H), 2.06-1.99 (m, 1H).  **$^{13}\text{C}$  NMR** (151 MHz,  $\text{CDCl}_3$ )  $\delta$  185.3, 167.7, 146.8, 136.2, 129.2, 129.0, 128.5, 125.2, 39.6, 25.6, 24.8; **IR** (thin film)  $\nu$  2920, 2360, 1739, 1669, 1277, 1126, 994, 849, 698  $\text{cm}^{-1}$ ; **HRMS** (ESI): Calcd. For  $\text{C}_{17}\text{H}_{16}\text{NaO}_3\text{S}_2^+$  ( $[\text{M}+\text{Na}^+]$ ): 355.0433, found 355.0425; **TLC** (1:4 EtOAc/hexanes):  $R_f$  = 0.44.

#### 1-(2-((*tert*-Butoxycarbonyl)amino)ethyl)-4-oxocyclohexa-2,5-dien-1-yl 1,3-dithiane-2-carboxylate (1f):

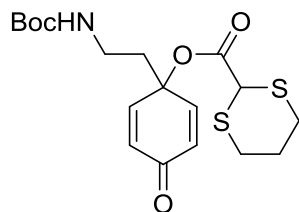

The title compound was obtained in 17% yield.

White solid, mp 107-109 °C;  **$^1\text{H}$  NMR** (600 MHz,  $\text{CDCl}_3$ )  $\delta$  6.91 (d,  $J$  = 10.1 Hz, 2H), 6.32 (d,  $J$  = 10.1 Hz, 2H), 4.68 (bs, 1H), 4.10 (s, 1H), 3.22-3.21 (m, 2H), 3.22-3.21 (m, 2H), 2.58-2.54 (m, 2H), 2.14-2.11 (m, 1H), 2.08-2.05 (m, 2H), 2.03-1.95 (m, 1H), 1.41 (s, 9H).  **$^{13}\text{C}$  NMR** (151 MHz,  $\text{CDCl}_3$ )  $\delta$  184.6, 168.0, 155.6, 147.0, 129.5, 79.7, 39.6, 39.3, 35.7, 33.9, 28.4, 25.6, 24.8; **IR** (thin film)  $\nu$  3354, 2975, 2929, 1738, 1668, 1517, 1366, 1274, 1169, 859  $\text{cm}^{-1}$ ; **HRMS** (ESI): Calcd. For  $\text{C}_{18}\text{H}_{25}\text{NNaO}_5\text{S}_2^+$  ( $[\text{M}+\text{Na}^+]$ ): 422.1066, found 422.1054; **TLC** (1:4 EtOAc/hexanes):  $R_f$  = 0.24.

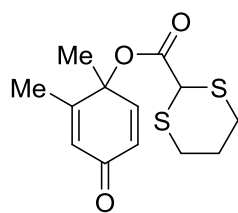

#### 1,2-Dimethyl-4-oxocyclohexa-2,5-dien-1-yl 1,3-dithiane-2-carboxylate (1g):

The title compound was obtained in 67% yield.

White solid, mp 120-121 °C;  **$^1\text{H}$  NMR** (600 MHz,  $\text{CDCl}_3$ )  $\delta$  6.91 (d,  $J$  = 10.2 Hz, 1H), 6.29 (dd,  $J$  = 9.9, 2.4 Hz, 1H), 6.16 (s, 1H), 4.13 (s, 1H), 3.48-3.36 (m, 2H), 2.61-2.56 (m, 2H), 2.20-2.15 (m, 1H), 2.07-1.99 (m, 1H), 2.04 (d,  $J$  = 1.2 Hz, 3H), 1.57 (s, 3H);  **$^{13}\text{C}$  NMR** (151 MHz,  $\text{CDCl}_3$ )  $\delta$  185.3, 168.0, 158.8, 149.4, 128.1, 126.8, 38.4, 26.4, 25.3, 25.3, 24.8, 17.8; **IR** (thin film)  $\nu$  2933, 1734, 1668, 1613, 1433, 1391, 1293, 1134, 1056, 885  $\text{cm}^{-1}$ ; **HRMS** (ESI): Calcd. For  $\text{C}_{13}\text{H}_{16}\text{NaO}_3\text{S}_2^+$  ( $[\text{M}+\text{Na}^+]$ ): 307.0433, found 307.0431; **TLC** (1:4 EtOAc/hexanes):  $R_f$  = 0.25.

## General procedure for intramolecular conjugate addition of dithiane:

A flame-dried 1 dram vial was charged sequentially with the dithiane-tethered cyclohexadienone (0.1 mmol, 1.0 equiv), followed by THF (1.0 mL), and then P2-*t*-Bu phosphazene (0.02 mmol, 20 mol %). The reaction was stirred at room temperature for 30 min. The reaction was quenched with saturated ammonium chloride, and the layers were separated. The aqueous layer was extracted three times with ethyl acetate, and then the combined organic phases were dried with sodium sulfate, and concentrated in vacuo. The crude materials thusly obtained were purified using flash column chromatography on silica gel using a hexane/EtOAc system (typically EtOAc/hexanes 1:9).

## Characterization of products:

### 7a-Methyl-3a,7a-dihydro-2*H*-spiro[benzofuran-3,2'-[1,3]dithiane]-2,5(4*H*)-dione (2a):

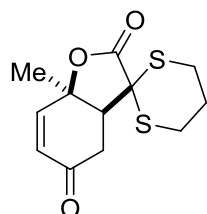

The title compound was prepared by the general procedure. White solid, mp 185-187 °C; <sup>1</sup>H NMR (600 MHz, CDCl<sub>3</sub>) δ 6.79 (dd, *J* = 10.5 Hz, 1.8 Hz, 1H), 6.10 (d, *J* = 10.2 Hz, 1H), 3.99-3.94 (m, 1H), 3.42-3.37 (m, 1H), 2.99 (d, *J* = 18.6 Hz, 1H), 2.87 (d, *J* = 7.2 Hz, 1H), 2.69 (dd, *J* = 18.6 Hz, 7.8 Hz, 1H), 2.63-2.61 (m, 2H), 2.17-2.13 (m, 1H), 1.87-1.80 (m, 1H), 1.68 (s, 3H); <sup>13</sup>C NMR (151 MHz, CDCl<sub>3</sub>) δ 193.4, 171.9, 147.7, 130.0, 78.8, 52.5, 49.5, 33.4, 27.4, 26.6, 25.9, 23.6; ; IR (thin film) ν 2920, 1761, 1681, 1275, 1194, 1104, 1067, 972, 787, 734 cm<sup>-1</sup>; HRMS (ESI): Calcd. For C<sub>12</sub>H<sub>15</sub>O<sub>3</sub>S<sub>2</sub><sup>+</sup> ([M+H<sup>+</sup>]): 271.0457, found 271.0457; TLC (2:8 EtOAc/hexanes): R<sub>f</sub> = 0.13.

### 7a-Ethyl-3a,7a-dihydro-2*H*-spiro[benzofuran-3,2'-[1,3]dithiane]-2,5(4*H*)-dione (2b):

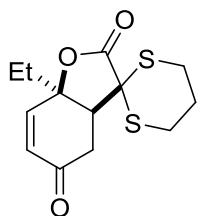

The title compound was prepared by the general procedure. White solid, mp 109-110 °C; <sup>1</sup>H NMR (400 MHz, CDCl<sub>3</sub>) δ 6.80 (d, *J* = 10.5 Hz, 1H), 6.18 (d, *J* = 10.6 Hz, 1H), 4.02-3.94 (m, 1H), 3.45-3.38 (m, 1H), 3.01 (d, *J* = 18.9 Hz, 1H), 2.89 (d, *J* = 8.0 Hz, 1H), 2.68-2.61 (m, 3H), 2.20-2.13 (m, 1H), 2.04-1.98 (m, 1H), 1.94-1.89 (m, 1H), 1.87-1.81 (m, 1H), 1.09 (t, *J* = 5.0 Hz, 3H); <sup>13</sup>C NMR (151 MHz, CDCl<sub>3</sub>) δ 193.8, 172.0, 147.0, 130.8, 81.2, 50.1, 49.7, 33.8, 32.8, 27.3, 26.0, 23.7, 7.8 IR (thin film) ν 3425, 2970, 1757, 1681, 1388, 1223, 1187, 1116, 978, 9321 cm<sup>-1</sup>; HRMS (ESI): Calcd. For C<sub>13</sub>H<sub>16</sub>NaO<sub>3</sub>S<sub>2</sub><sup>+</sup> ([M+Na<sup>+</sup>]): 307.0433, found 307.0433; TLC (2:8 EtOAc/hexanes): R<sub>f</sub> = 0.28.

**Methyl 3-(2,5-dioxo-4,5-dihydro-2H-spiro[benzofuran-3,2'-[1,3]dithian]-7a(3aH)-yl)propanoate**

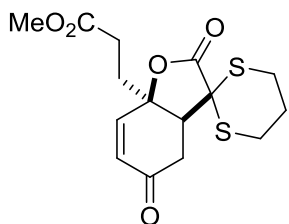

**(2c):** The title compound was prepared by the general procedure. White solid, mp 114-115 °C;  $^1\text{H NMR}$  (600 MHz,  $\text{CDCl}_3$ )  $\delta$  6.78 (dd,  $J = 10.5, 1.6$  Hz, 1H), 6.17 (d,  $J = 10.6$  Hz, 1H), 3.98-3.93 (m, 1H), 3.72 (s, 3H), 3.42-3.37 (m, 1H), 3.00 (d,  $J = 18.9$  Hz, 1H), 2.89 (d,  $J = 7.7$  Hz, 1H), 2.69 (dd,  $J = 18.8, 7.8$  Hz, 1H), 2.64-2.61 (m, 2H), 2.59-2.51 (m, 2H), 2.35-2.30 (m, 1H), 2.25-2.20 (m, 1H), 2.18-2.14 (m, 1H), 1.88-1.81 (m, 1H);  $^{13}\text{C NMR}$  (151 MHz,  $\text{CDCl}_3$ )  $\delta$  193.3,

172.5, 171.6, 146.0, 131.1, 79.8, 52.2, 50.5, 49.3, 34.4, 33.4, 28.0, 27.3, 26.0, 23.6; **IR** (thin film)  $\nu$  2923, 2852, 1760, 1735, 1685, 1435, 1166, 1079, 972, 932  $\text{cm}^{-1}$ ; **HRMS** (ESI): Calcd. For  $\text{C}_{15}\text{H}_{19}\text{O}_5\text{S}_2\text{Si}^+$  ( $[\text{M}+\text{H}^+]$ ): 343.0668, found 343.0663; **TLC** (3:7 EtOAc/hexanes):  $R_f = 0.14$ .

**7a-(2-((*tert*-Butyldimethylsilyl)oxy)ethyl)-3a,7a-dihydro-2H-spiro[benzofuran-3,2'-[1,3]dithiane]-2,5(4H)-dione (2d):**

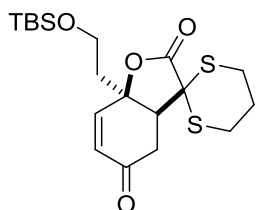

The title compound was prepared by the general procedure. White solid, mp 135-137 °C;  $^1\text{H NMR}$  (600 MHz,  $\text{CDCl}_3$ )  $\delta$  6.78 (d,  $J = 10.5$  Hz, 1H), 6.15 (d,  $J = 10.5$  Hz, 1H), 3.97 (td,  $J = 13.6, 2.4$  Hz, 1H), 3.89-3.86 (m, 1H), 3.80-3.76 (m, 1H), 3.43-3.93 (m, 1H), 3.35 (d,  $J = 7.8$  Hz, 1H), 2.96 (d,  $J = 18.8$  Hz, 1H), 2.81 (dd,  $J = 18.8, 7.7$  Hz, 1H), 2.63-2.60 (m, 1H), 2.18-2.14 (m, 1H), 2.08-2.04 (m, 1H), 2.88-2.81 (m, 1H), 0.90 (s, 9H), 0.09 (s, 3H), 0.08 (s, 3H);  $^{13}\text{C NMR}$  (151 MHz,  $\text{CDCl}_3$ )  $\delta$  194.3,

172.2, 147.4, 130.5, 80.7, 57.7, 50.0, 49.5, 41.6, 33.5, 27.3, 26.0, 25.8, 23.7, 18.1, -5.5, -5.5; **IR** (thin film)  $\nu$  23434, 2953, 1761, 1642, 1407, 1248, 1182, 1095, 778  $\text{cm}^{-1}$ ; **HRMS** (ESI): Calcd. For  $\text{C}_{19}\text{H}_{31}\text{O}_4\text{S}_2\text{Si}^+$  ( $[\text{M}+\text{H}^+]$ ): 415.1428, found 415.1420; **TLC** (2:8 EtOAc/hexanes):  $R_f = 0.37$ .

**7a-Phenyl-3a,7a-dihydro-2H-spiro[benzofuran-3,2'-[1,3]dithiane]-2,5(4H)-dione (2e):**

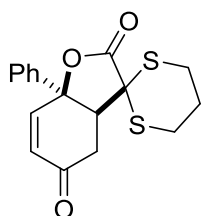

The title compound was prepared by the general procedure. White solid, mp 171-172 °C;  $^1\text{H NMR}$  (600 MHz,  $\text{CDCl}_3$ )  $\delta$  7.46-7.42 (m, 5H), 6.87 (d,  $J = 10.2$  Hz, 1H), 6.40 (d,  $J = 10.2$  Hz, 1H), 4.02 (t,  $J = 13.2$  Hz, 1H), 3.50 (t,  $J = 14.4$  Hz, 1H), 3.03 (d,  $J = 7.2$  Hz, 1H), 2.99 (d,  $J = 18.6$  Hz, 1H), 2.72-2.64 (m, 3H), 2.20 (m, 1H), 1.87 (q,  $J = 13.2$  Hz, 1H);  $^{13}\text{C NMR}$  (151 MHz,  $\text{CDCl}_3$ )  $\delta$  193.8, 172.0, 145.3, 138.8, 131.5, 129.3, 129.2, 124.6, 81.7, 54.6, 49.4, 33.0, 27.4, 26.0, 23.7; **IR** (thin film)  $\nu$  22971, 2361,

1769, 1684, 1540, 1507, 1224, 1170, 997, 799  $\text{cm}^{-1}$ ; **HRMS** (ESI): Calcd. For  $\text{C}_{17}\text{H}_{17}\text{O}_3\text{S}_2^+$  ( $[\text{M}+\text{H}^+]$ ): 333.0614, found 333.0608; **TLC** (3:7 EtOAc/hexanes):  $R_f = 0.38$ .

**tert-Butyl 2,5-dioxohexahydro-2H-spiro[furo[2,3-d]indole-3,2'-[1,3]dithiane]-7(3aH)-carboxylate**

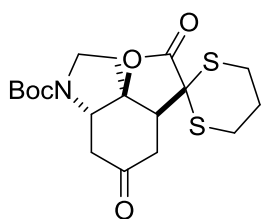

**(2f):** The title compound was prepared by the general procedure. Two rotamers were observed in a 56:44 ratio in the  $^1\text{H}$  NMR spectrum. White solid, mp 196-197 °C;  $^1\text{H}$  NMR (600 MHz,  $\text{CDCl}_3$ )  $\delta$  4.32-4.04 (m, 1H for the minor rotamer), 4.28-4.25 (m, 1H for the major rotamer) 3.77-3.58 (m, 4H), 3.19 (dd,  $J$  = 17.2, 5.8 Hz, 1H for the minor rotamer), 3.02 (dd,  $J$  = 17.1, 5.7 Hz, 1H for the major rotamer), 2.80-2.75 (m, 1H), 2.75-2.73 (m, 4H), 2.63-2.59 (m, 1H), 2.32-2.26 (m, 1H), 2.24-2.19 (m, 1H), 2.10-1.99 (m, 1H), 1.96-1.89 (m, 1H), 1.48 (s, 9H);  $^{13}\text{C}$  NMR (151 MHz,  $\text{CDCl}_3$ )  $\delta$  205.0, 204.7, 171.2, 153.8, 153.5, 88.7, 88.0, 80.7, 60.6, 60.5, 49.3, 48.3, 48.2, 44.4, 44.0, 43.6, 42.9, 37.3, 37.2, 35.7, 34.8, 28.5, 28.4, 27.6, 27.5, 26.4, 26.3, 23.8; IR (thin film)  $\nu$  2974, 2927, 1764, 1721, 1691, 1399, 1249, 1174, 1136 975  $\text{cm}^{-1}$ ; HRMS (ESI): Calcd. For  $\text{C}_{18}\text{H}_{25}\text{NNaO}_5\text{S}_2$  ( $[\text{M}+\text{Na}^+]$ ): 422.1067, found 422.1077; TLC (1:1 EtOAc/hexanes):  $R_f$  = 0.50.

**7,7a-Dimethyl-3a,7a-dihydro-2H-spiro[benzofuran-3,2'-[1,3]dithiane]-2,5(4H)-dione (2g):**

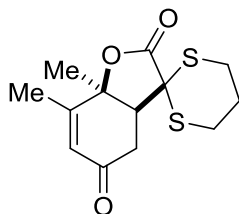

The title compound was prepared by the general procedure. Impurity present in the  $\delta$  2.73-2.67 multiplet makes integral appear as 3H. Orange-brown solid, mp 169-179 °C;  $^1\text{H}$  NMR (600 MHz,  $\text{CDCl}_3$ )  $\delta$  5.96 (s, 1H), 3.96 (t,  $J$  = 13.8 Hz, 1H), 3.35 (t,  $J$  = 13.8 Hz, 1H), 2.98 (d,  $J$  = 19.2 Hz, 1H), 2.868 (d,  $J$  = 9.0 Hz, 1H), 2.73-2.67 (m, 1H), 2.63-2.60 (m, 2H), 2.17-2.14 (m, 1H), 2.09 (s, 3H), 1.83 (q,  $J$  = 13.2 Hz, 1H), 1.69 (s, 3H);  $^{13}\text{C}$  NMR (151 MHz,  $\text{CDCl}_3$ )  $\delta$  193.2, 171.9, 159.3, 128.5, 81.0, 53.2, 49.5, 33.1, 27.1, 26.1, 25.7, 23.7, 18.4; IR (thin film)  $\nu$  2920, 1266, 1760, 1671, 1425, 1228, 1190, 1098, 970, 935  $\text{cm}^{-1}$ ; HRMS (ESI): Calcd. For  $\text{C}_{13}\text{H}_{17}\text{O}_3\text{S}_2$  ( $[\text{M}+\text{Na}^+]$ ): 285.0614, found 285.0611; TLC (2:8 EtOAc/hexanes):  $R_f$  = 0.13.



**Procedure for the preparation of 5-hydroxy-7a-methyl-3a,4,5,7a-tetrahydro-2H-spiro[benzofuran-3,2'-[1,3]dithian]-2-one (3) via Luche reduction of enone 2a:** CeCl<sub>3</sub>·7H<sub>2</sub>O (1.2 equiv) and NaBH<sub>4</sub> (5.3 equiv) were added to a solution of the substrate (2a) in MeOH (0.2 M) at -10 °C. The reaction mixture was stirred at the same temperature for 40 min. After this period, it was quenched with 1 M HCl and extracted with EtOAc three times. The combined organic phases were dried over Na<sub>2</sub>SO<sub>4</sub>, filtered, and concentrated under reduced pressure. The crude residue was purified by flash column chromatography on silica gel using EtOAc/hexanes 3:7 as the eluent.

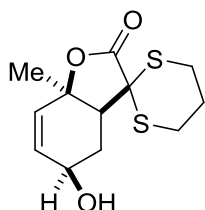

White solid, mp 97-99 °C; <sup>1</sup>H NMR (600 MHz, CDCl<sub>3</sub>) δ 5.95 (d, *J* = 10.2 Hz, 1H), 5.79 (d, *J* = 10.2 Hz, 1H), 4.20-4.16 (br, 1H), 4.00 (t, *J* = 13.8 Hz, 1H), 3.62 (t, *J* = 18.3 Hz, 1H), 2.68-2.64 (m, 2H), 2.46-2.43 (d, *J* = 12.0, 5.4 Hz, 1H), 2.41-2.37 (m, 1H), 2.22-2.18 (m, 1H), 1.98-1.90 (m, 1H), 1.86 (d, *J* = 7.2 Hz, 1H), 1.77-1.70 (m, 1H), 1.67 (s, 3H); <sup>13</sup>C NMR (151 MHz, CDCl<sub>3</sub>) δ 172.6, 134.7, 129.6, 65.4, 49.9, 49.8, 49.8, 31.3, 29.0, 28.2, 26.5, 24.3; IR (thin film) ν 3035, 2926, 1752, 1423, 1276 1189, 1148, 1061, 956, 732 cm<sup>-1</sup>; HRMS (ESI): Calcd. For C<sub>12</sub>H<sub>17</sub>O<sub>3</sub>S<sub>2</sub> ([M+Na<sup>+</sup>]): 273.0614, found 273.0610; TLC (6:4 EtOAc/hexanes): R<sub>f</sub> = 0.34.

**Procedure for the preparation of 5-hydroxy-5,7a-dimethyl-3a,4,5,7a-tetrahydro-2H-spiro[benzofuran-3,2'-[1,3]dithian]-2-one (4) via 1,2-addition of AlMe<sub>3</sub>:** A solution of the substrate (2a) in dry CH<sub>2</sub>Cl<sub>2</sub> was added to a solution of AlMe<sub>3</sub> (2 M in toluene, 4 equiv) in dry CH<sub>2</sub>Cl<sub>2</sub> at 0 °C. The reaction mixture was allowed to reach room temperature and kept under stirring for 3 h. After this period, it was quenched with MeOH and extracted with CH<sub>2</sub>Cl<sub>2</sub> and EtOAc. The combined organic phases were dried over anhydrous Na<sub>2</sub>SO<sub>4</sub> and the solvent was removed under reduced pressure.

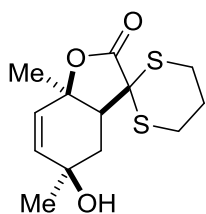

Light yellow solid, mp 179-180 °C; <sup>1</sup>H NMR (600 MHz, CDCl<sub>3</sub>) δ 5.91 (dd, *J* = 10.1, 1.4 Hz, 1H), 5.67 (d, *J* = 10.1 Hz, 1H), 4.06-4.01 (m, 1H), 3.62-3.57 (m, 1H), 2.71-2.65 (m, 3H), 2.50 (dd, *J* = 12.7, 5.6 Hz, 1H), 2.23-2.16 (m, 2H), 1.95-1.91 (m, 2H), 1.70 (s, 3H), 1.28 (s, 3H); <sup>13</sup>C NMR (151 MHz, CDCl<sub>3</sub>) δ 172.7, 137.9, 128.0, 79.1, 68.9, 50.0, 36.7, 29.3, 28.3, 26.5, 26.4, 24.4; IR (thin film) ν 3433, 2960, 2088, 1752, 1643, 1373, 1280, 1193, 1151, 1055 cm<sup>-1</sup>; HRMS (ESI): Calcd. For C<sub>13</sub>H<sub>18</sub>NaO<sub>3</sub>S<sub>2</sub> ([M+Na<sup>+</sup>]): 309.0590, found 309.0593; TLC (4:6 EtOAc/hexanes): R<sub>f</sub> = 0.43.

## References:

1. a) Felpin, F.-X. *Tetrahedron Lett.* **2007**, 48, 409. b) McKillop, A.; McLaren, L.; Taylor, R. J. K. *J. Chem. Soc., Perkin Trans. 1*, **1994**, 15, 2047. c) Jepsen, T. H.; Jensen, A. A.; Lund, M. H.; Glibstrup, E.; Kristensen, J. L. *ACS Med. Chem. Lett.* **2014**, 5, 766. d) Canesi, S.; Bouchu, D.; Ciufolini, M. A. *Org. Lett.* **2005**, 7, 175. e) Brown, P. D.; Willis, A. C.; Sherburn, M. S.; Lawrence, A. L. *Org. Lett.* **2012**, 14, 4537.
2. Kondoh, A.; Oishi, M.; Takeda, T.; Terada, M. *Angew. Chem., Int. Ed.* **2015**, 54, 15836.

Crude  $^1\text{H}$  NMR spectra for the desymmetrization reaction:

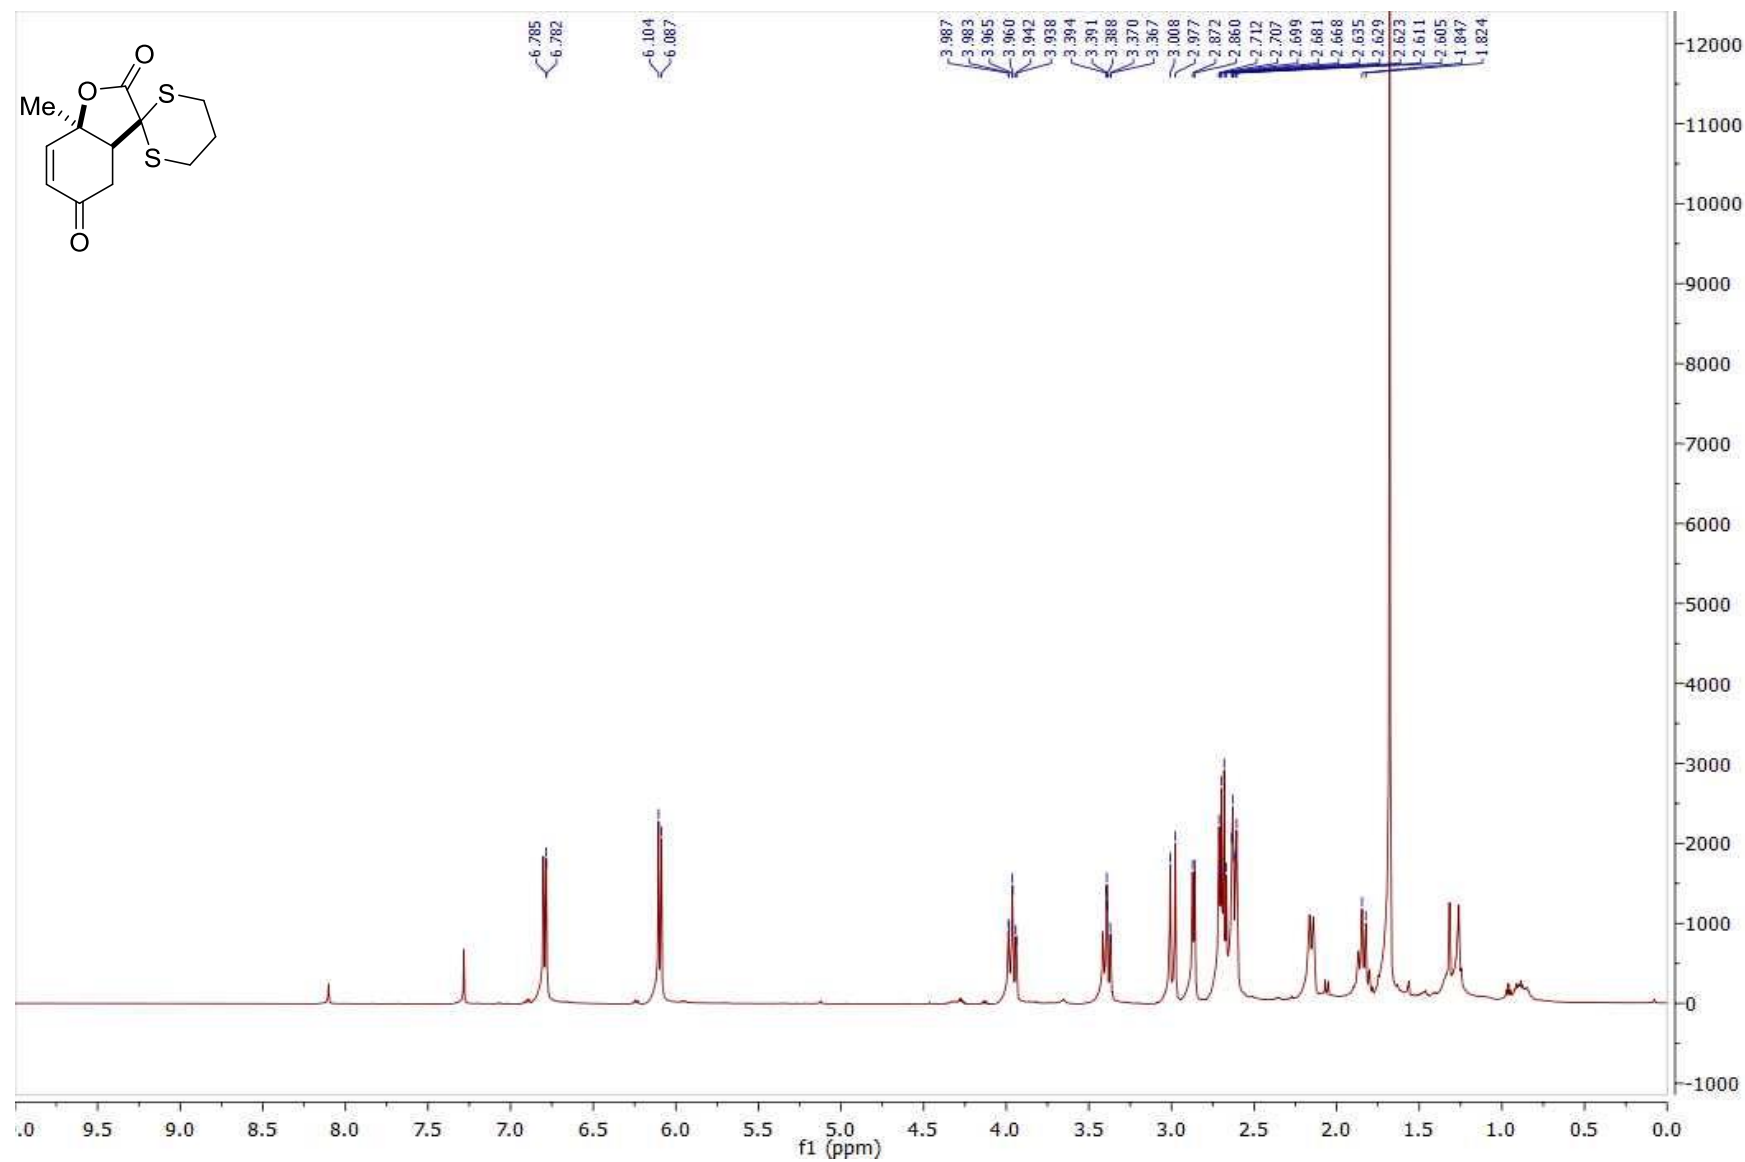

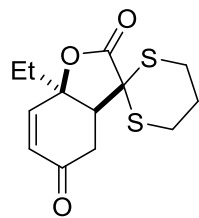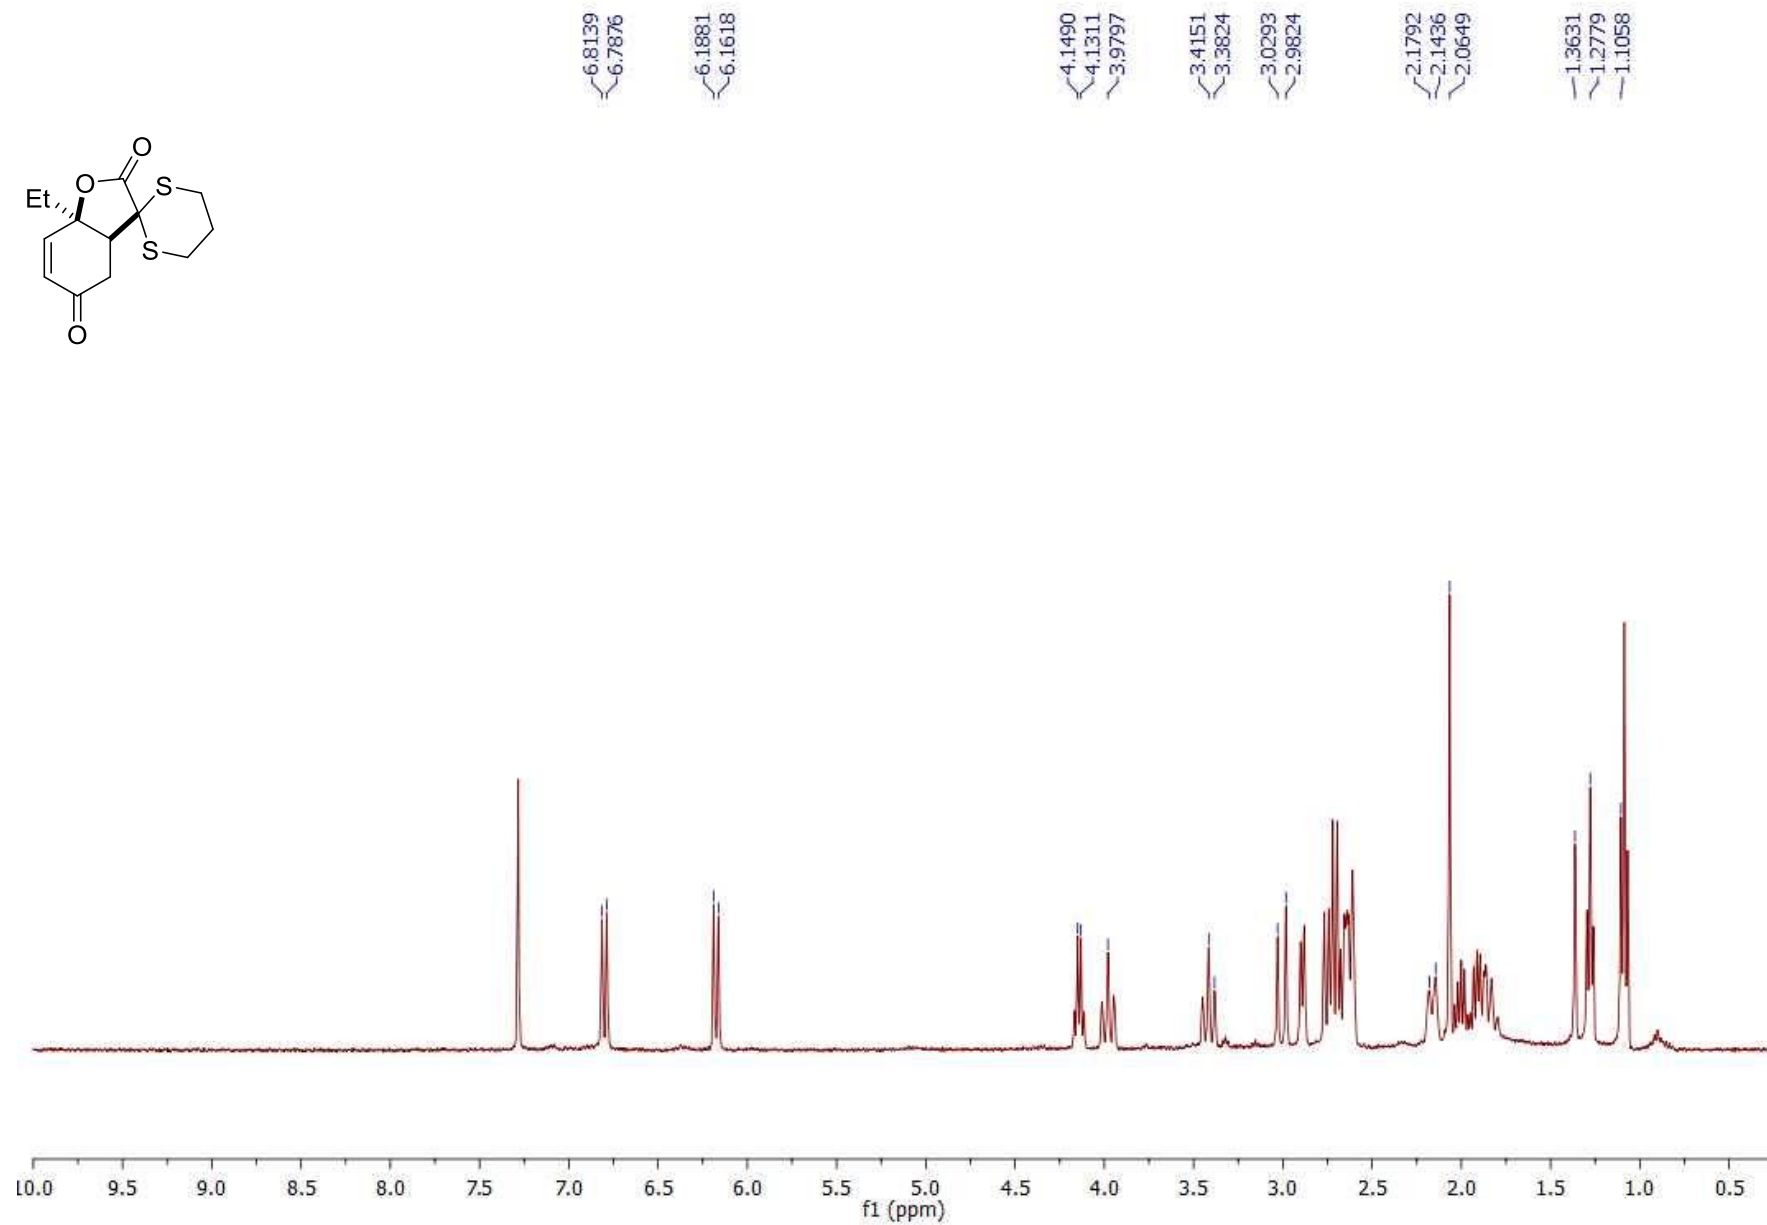

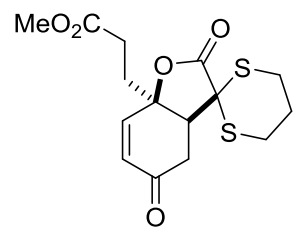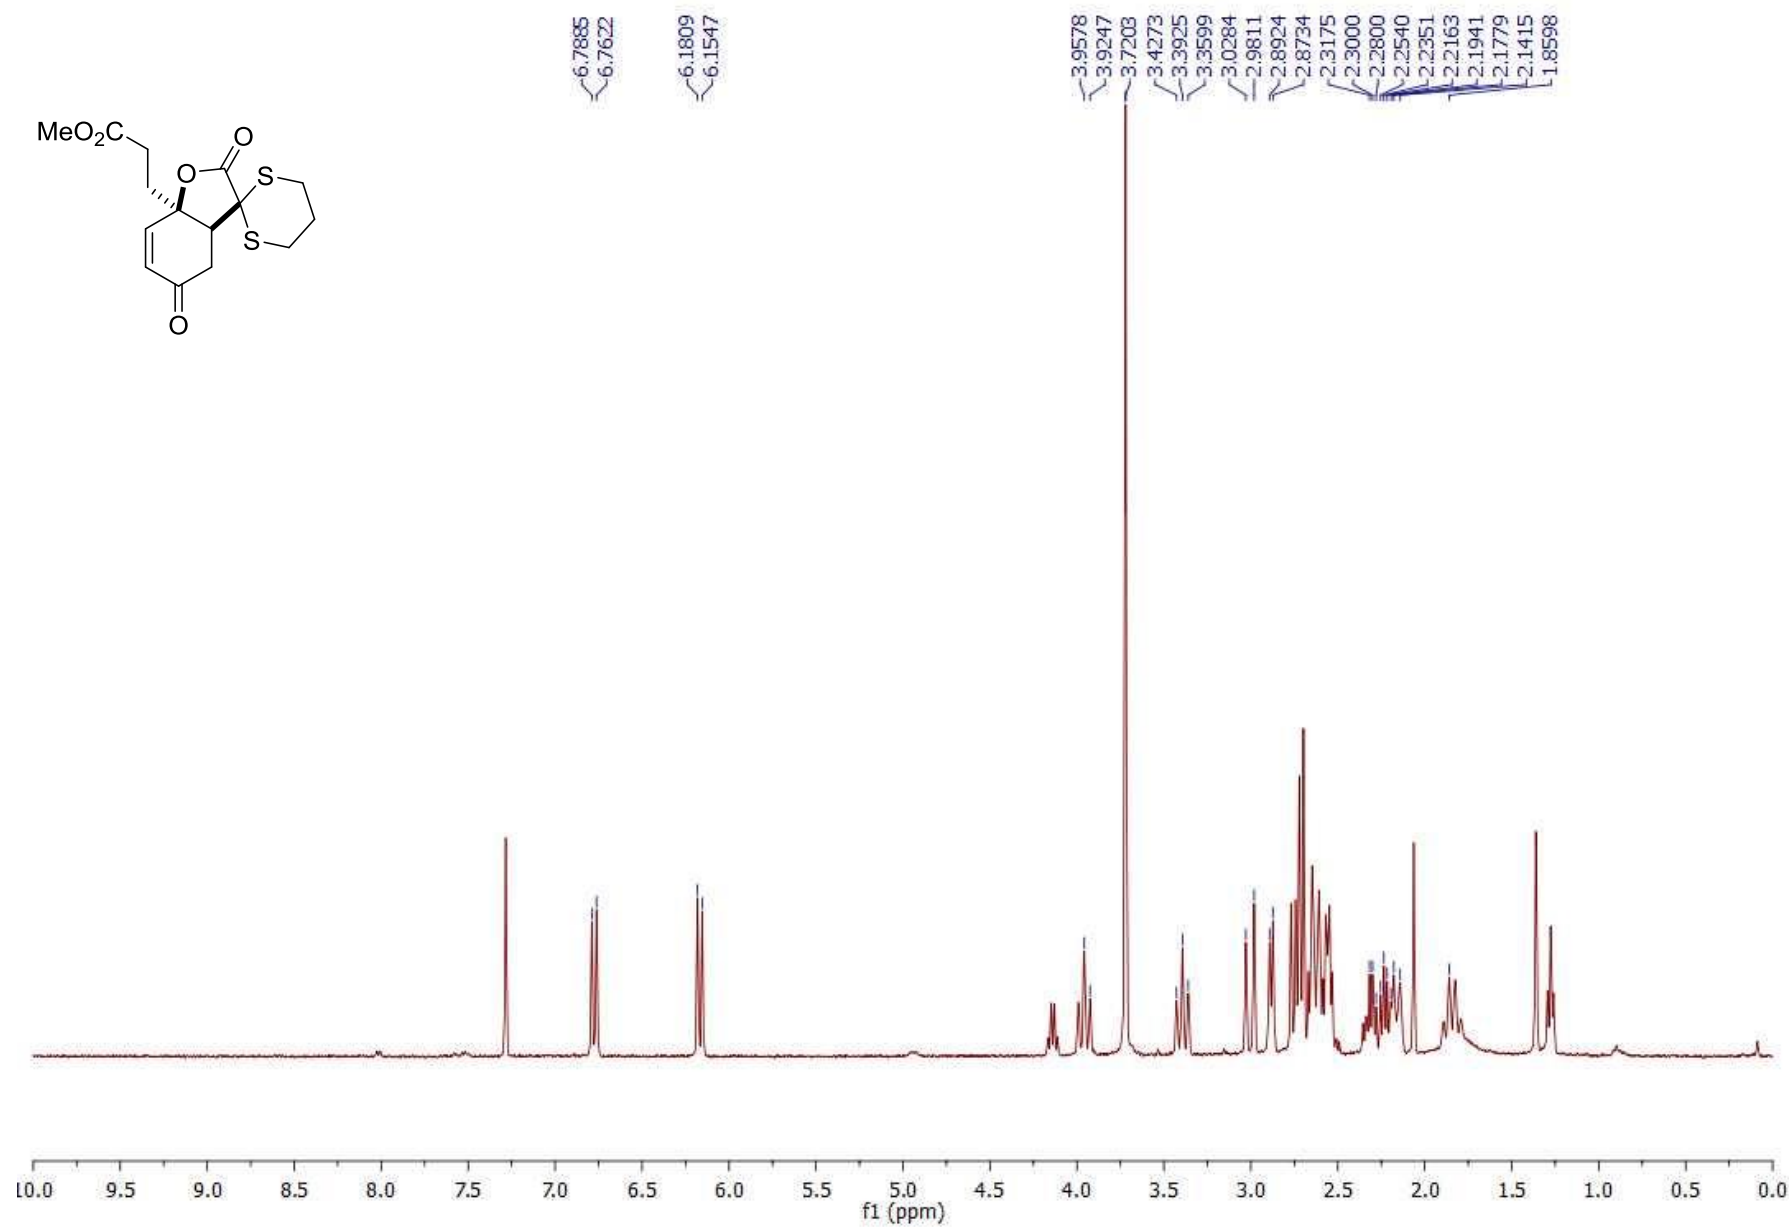

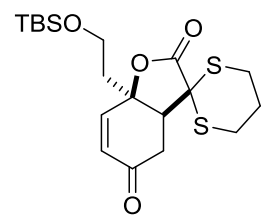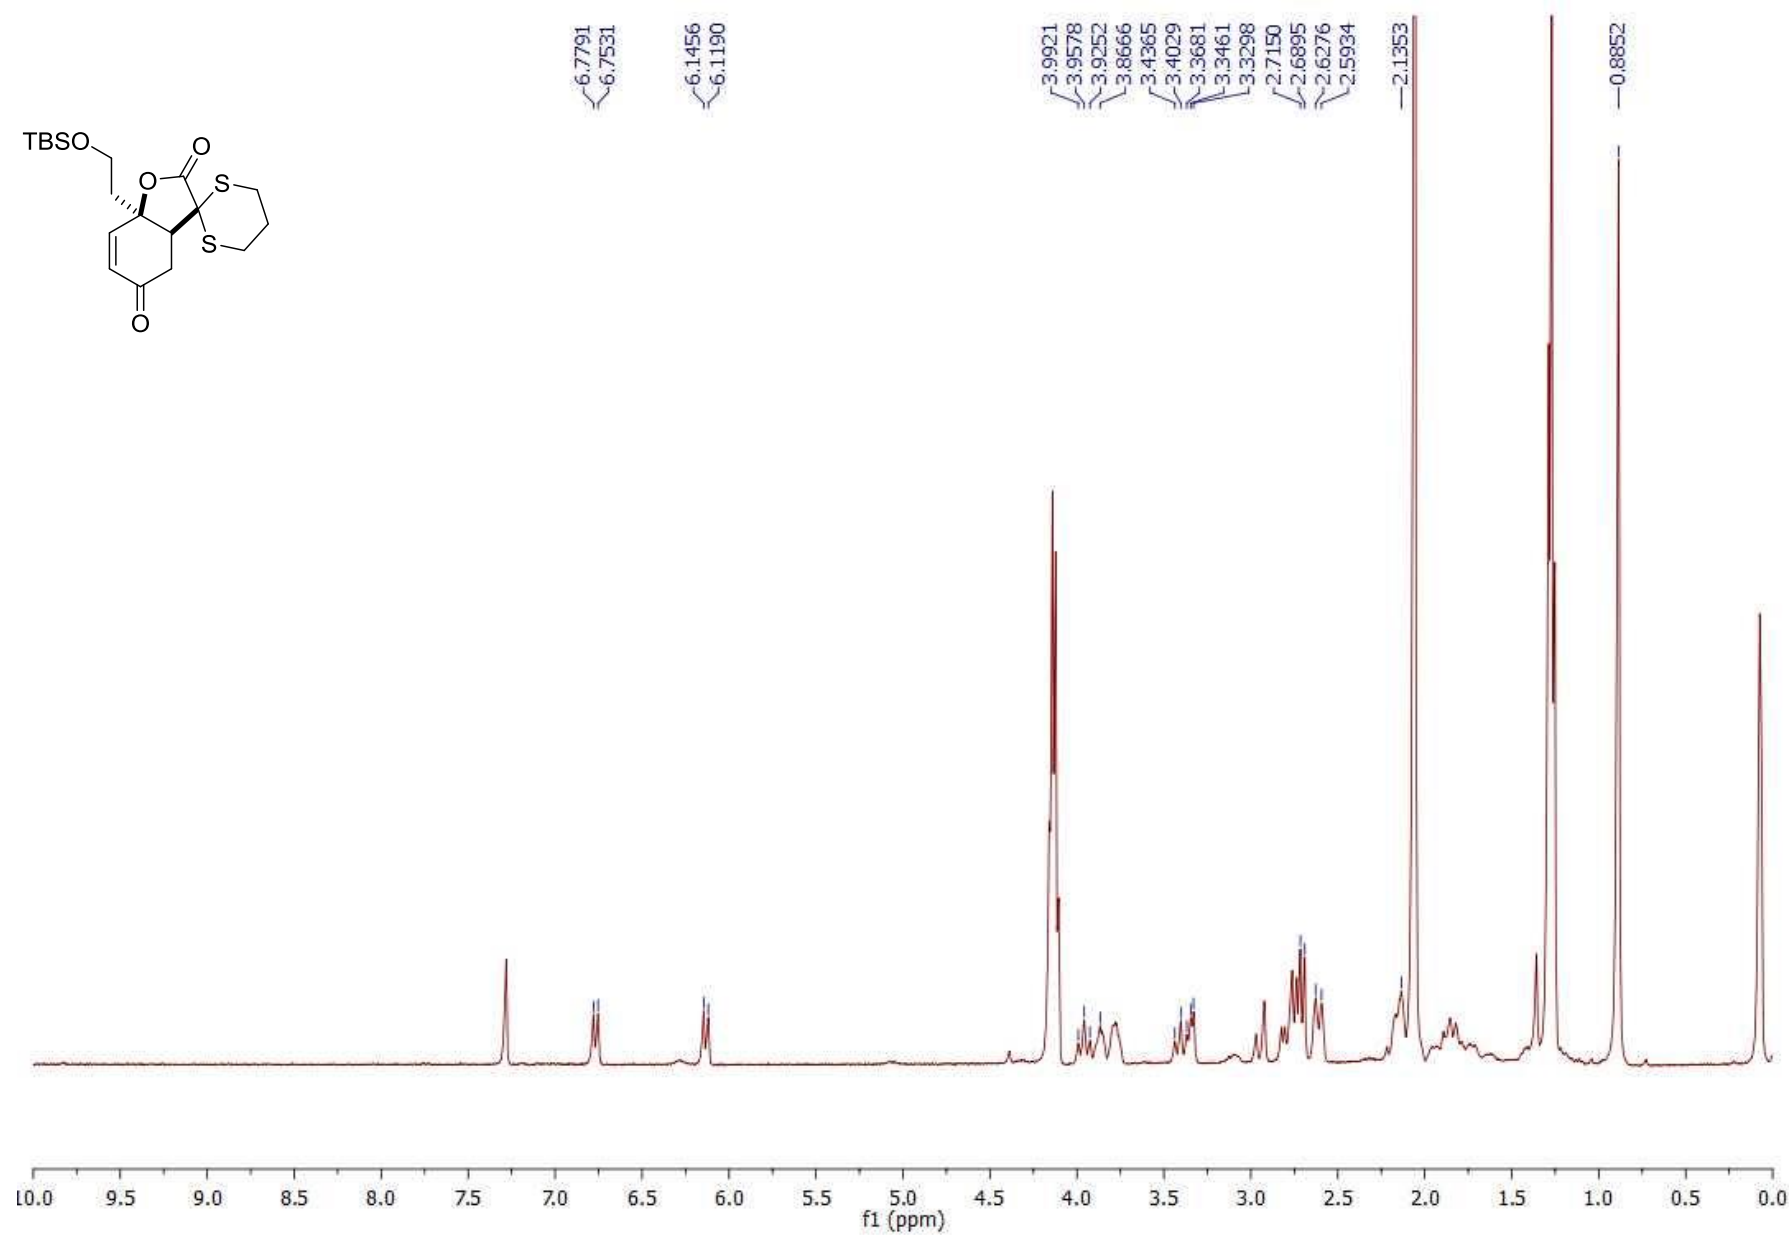

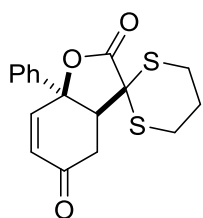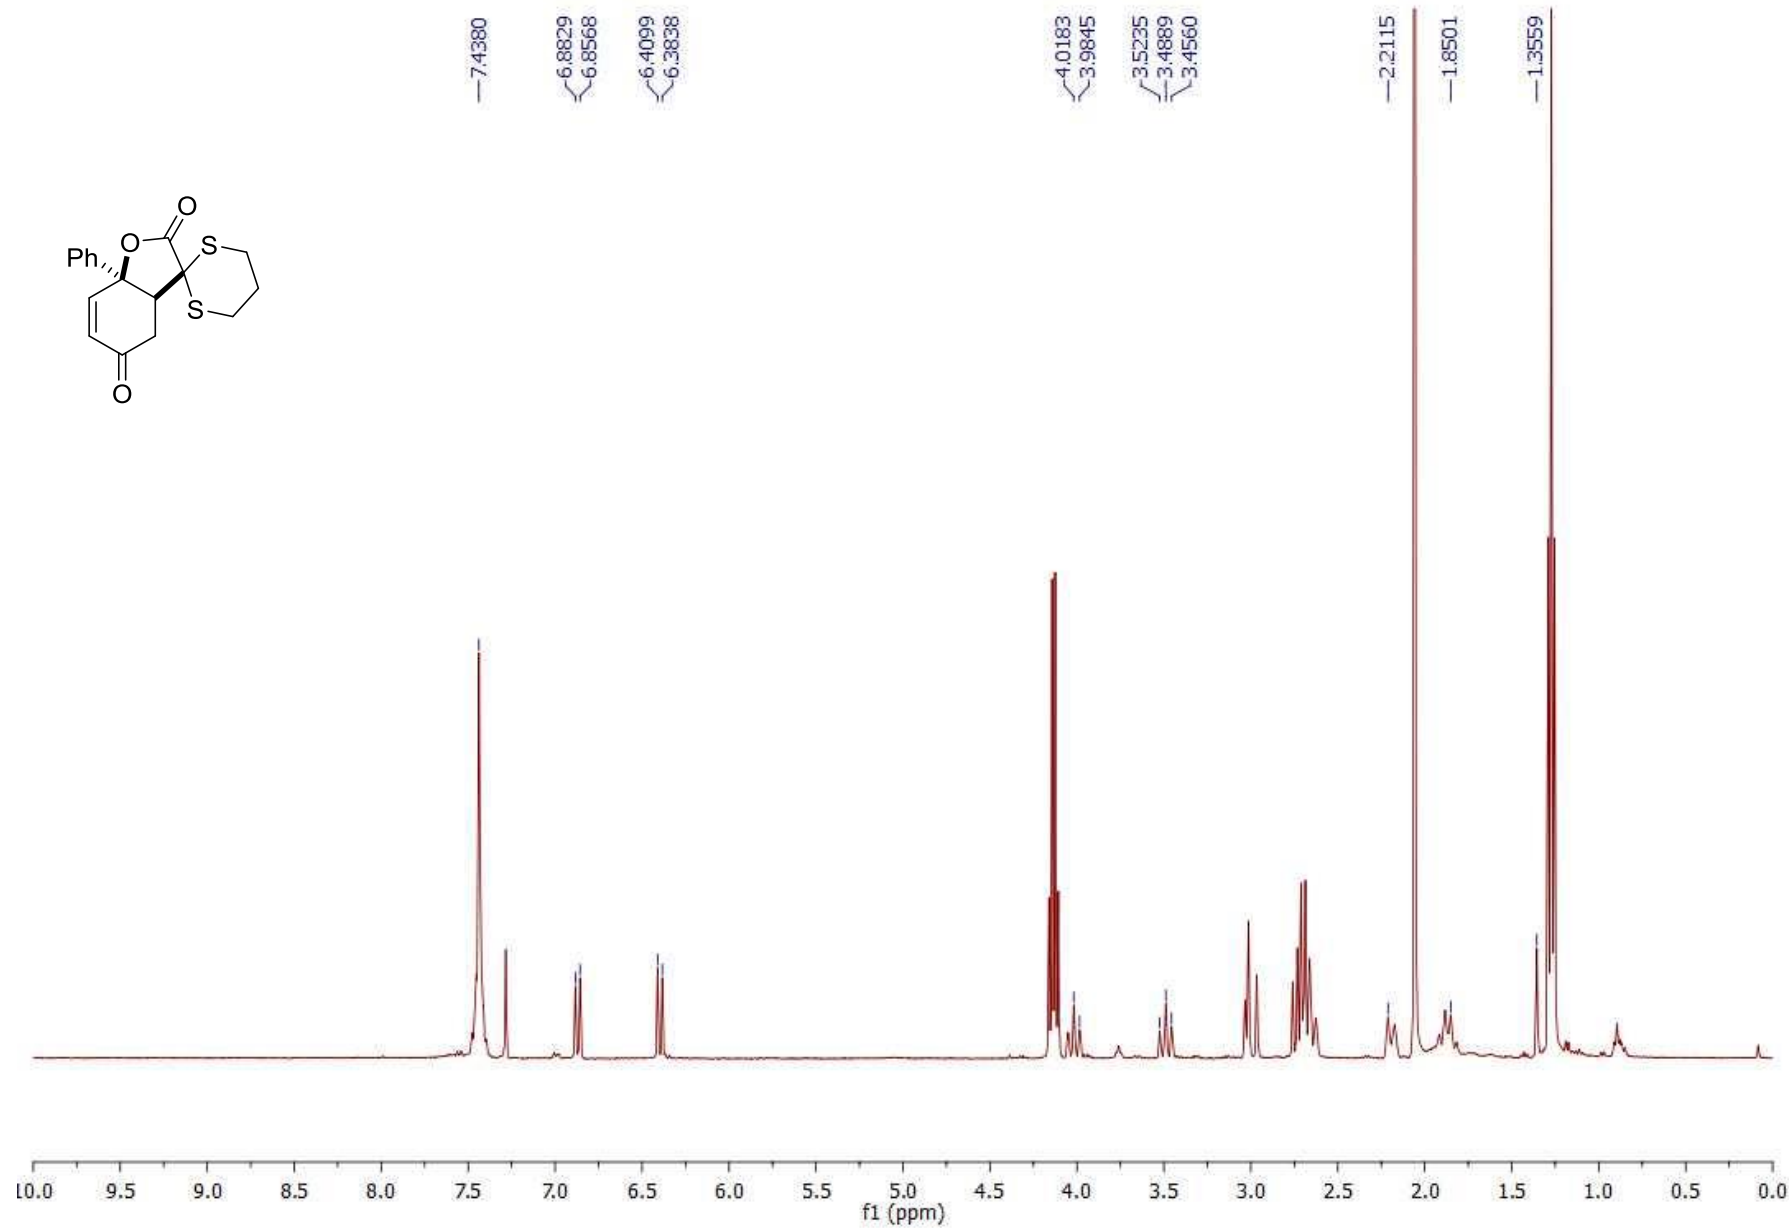

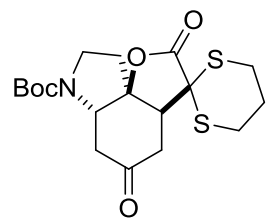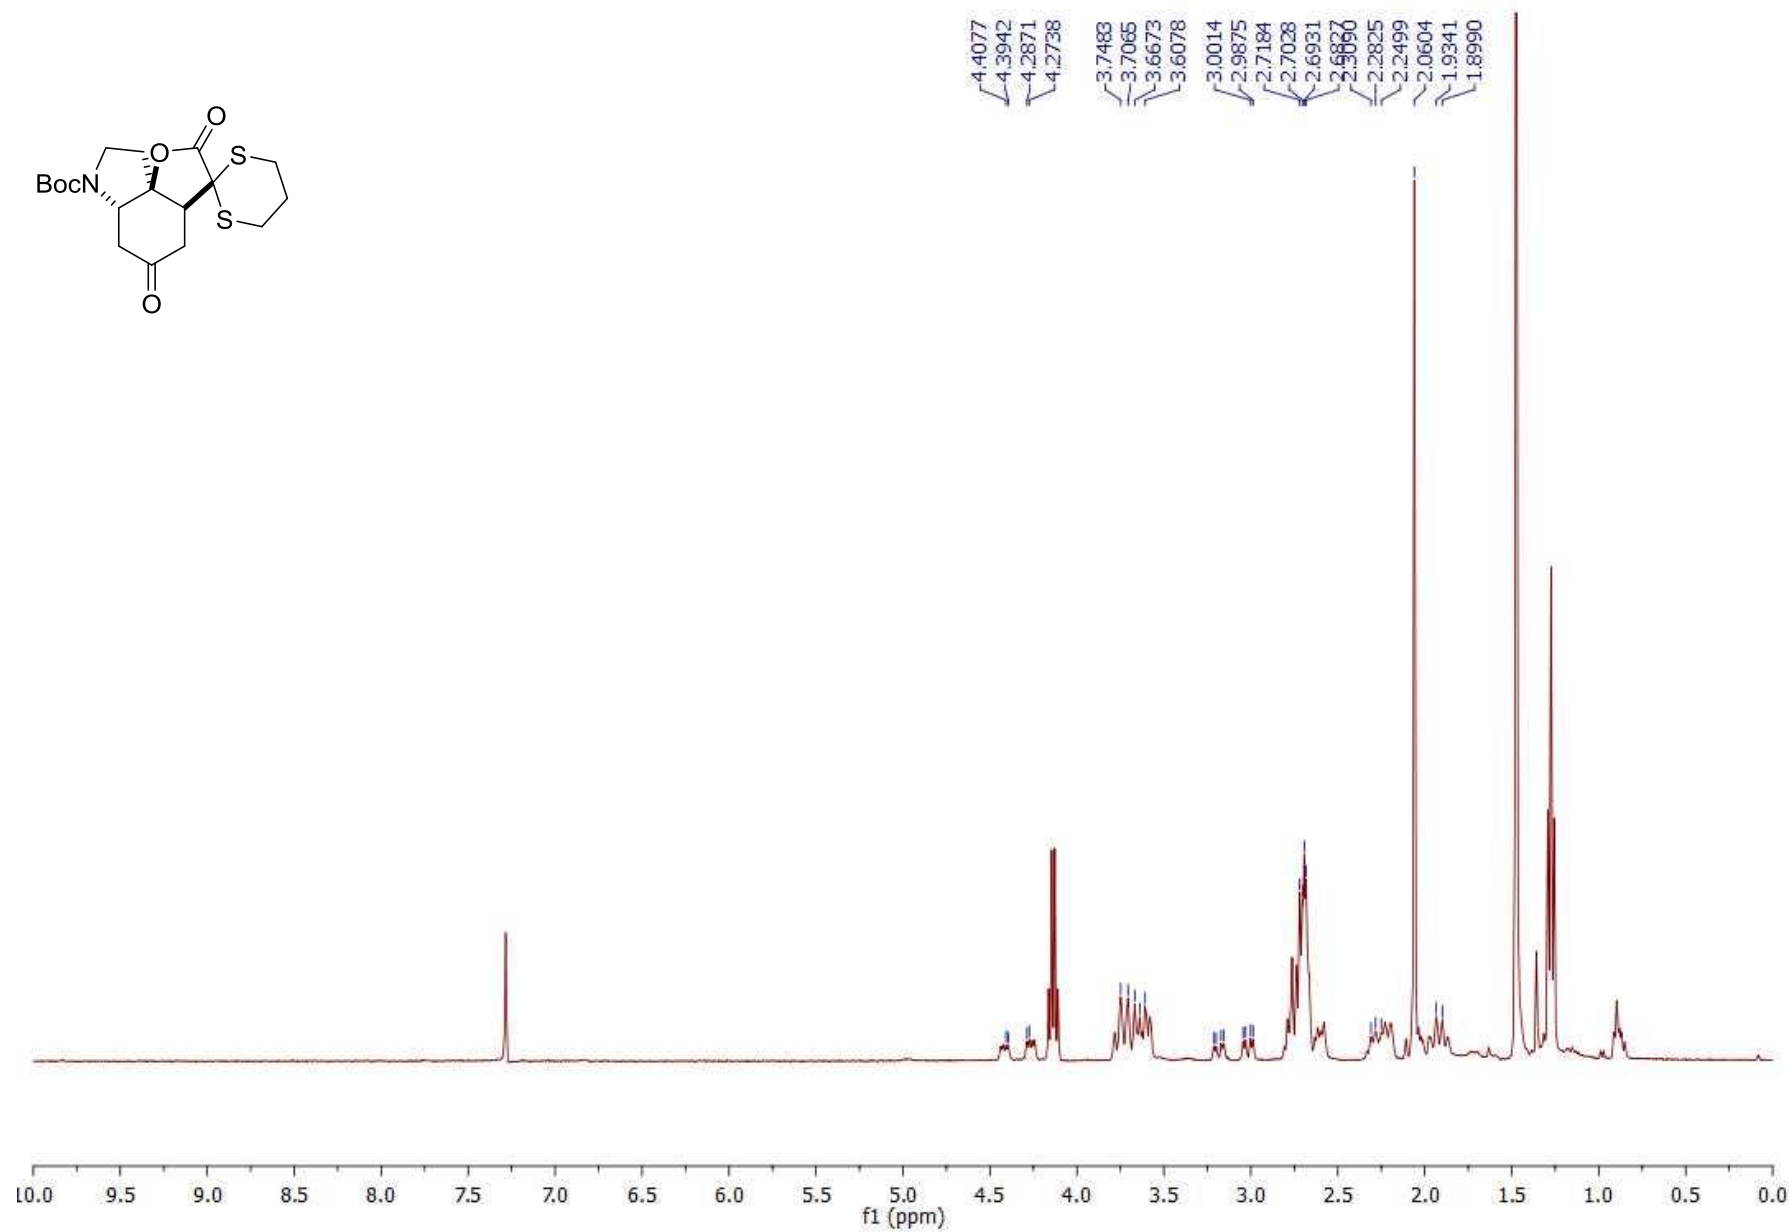



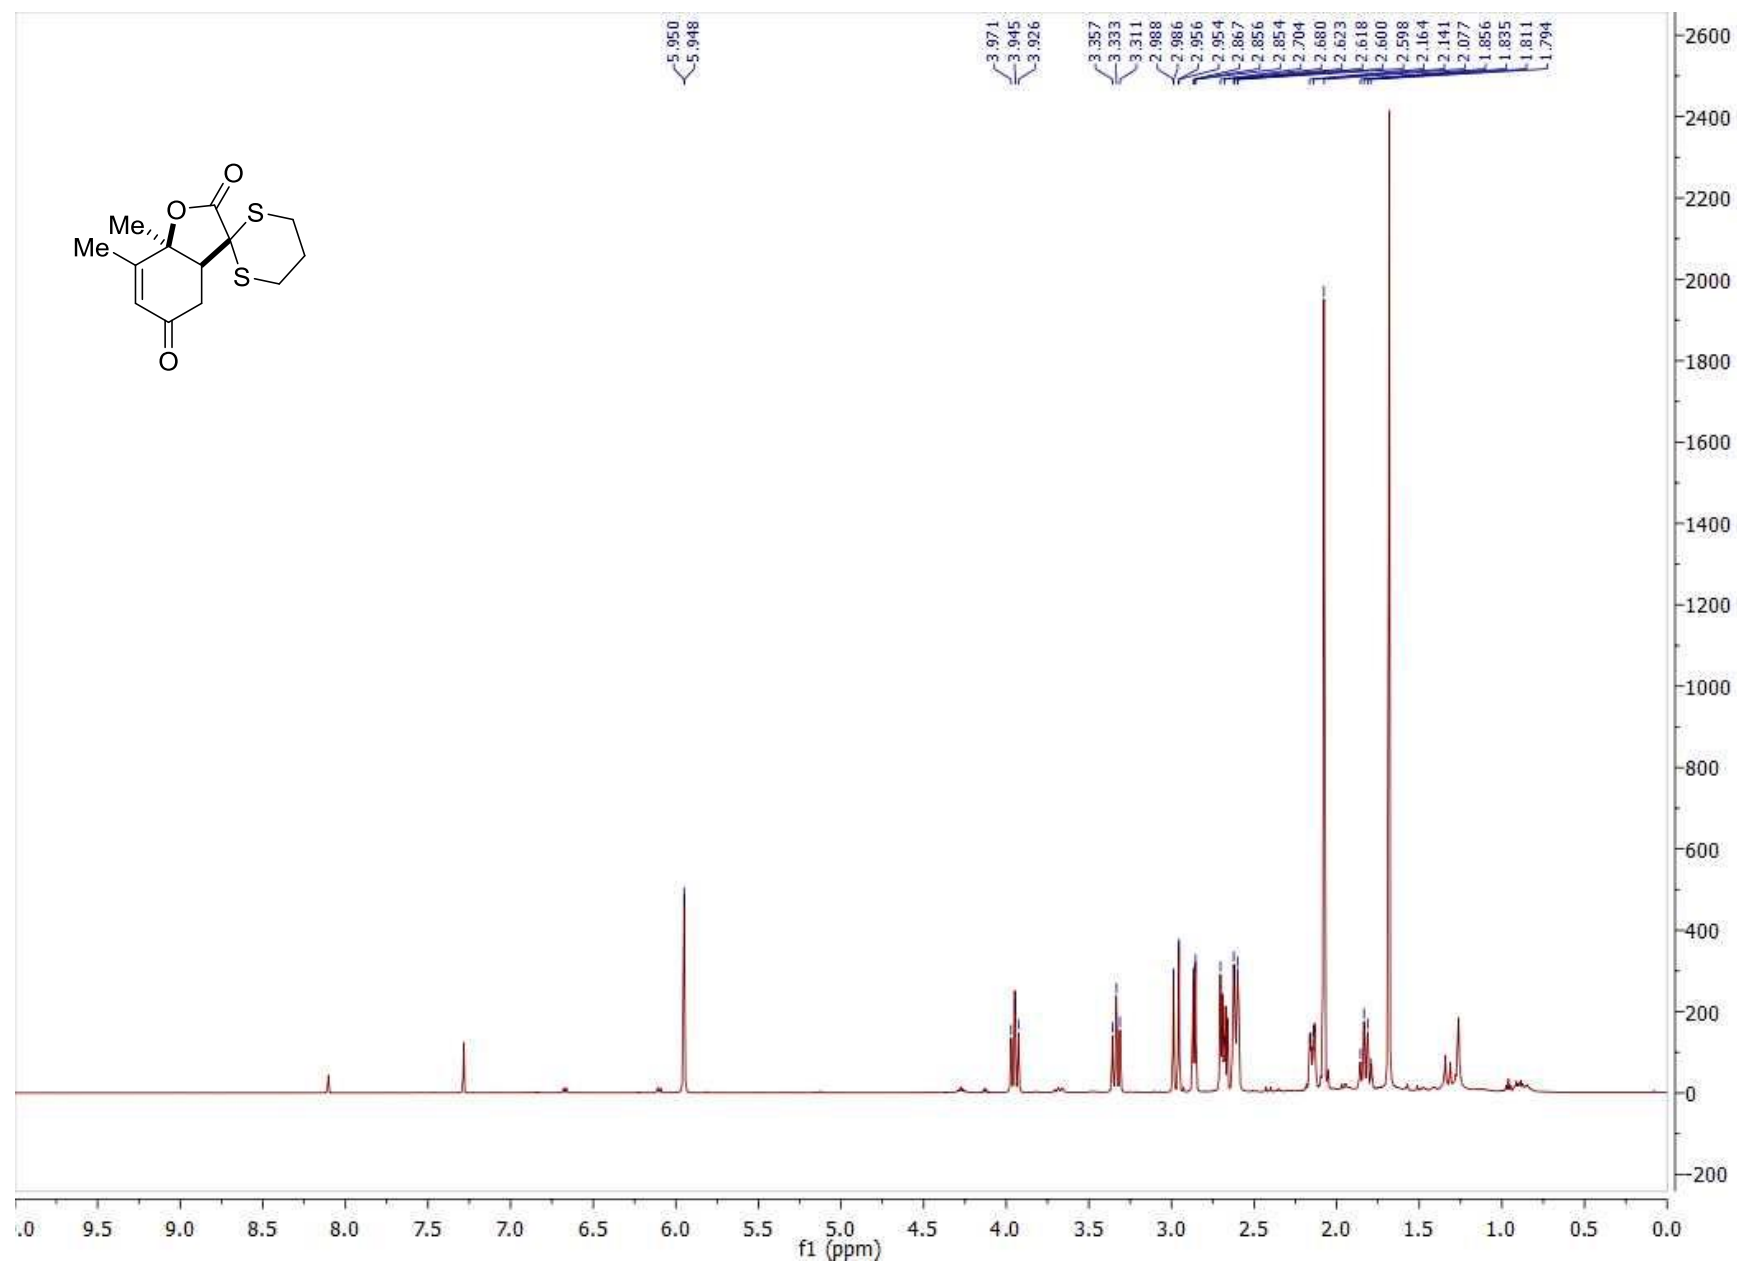

S17

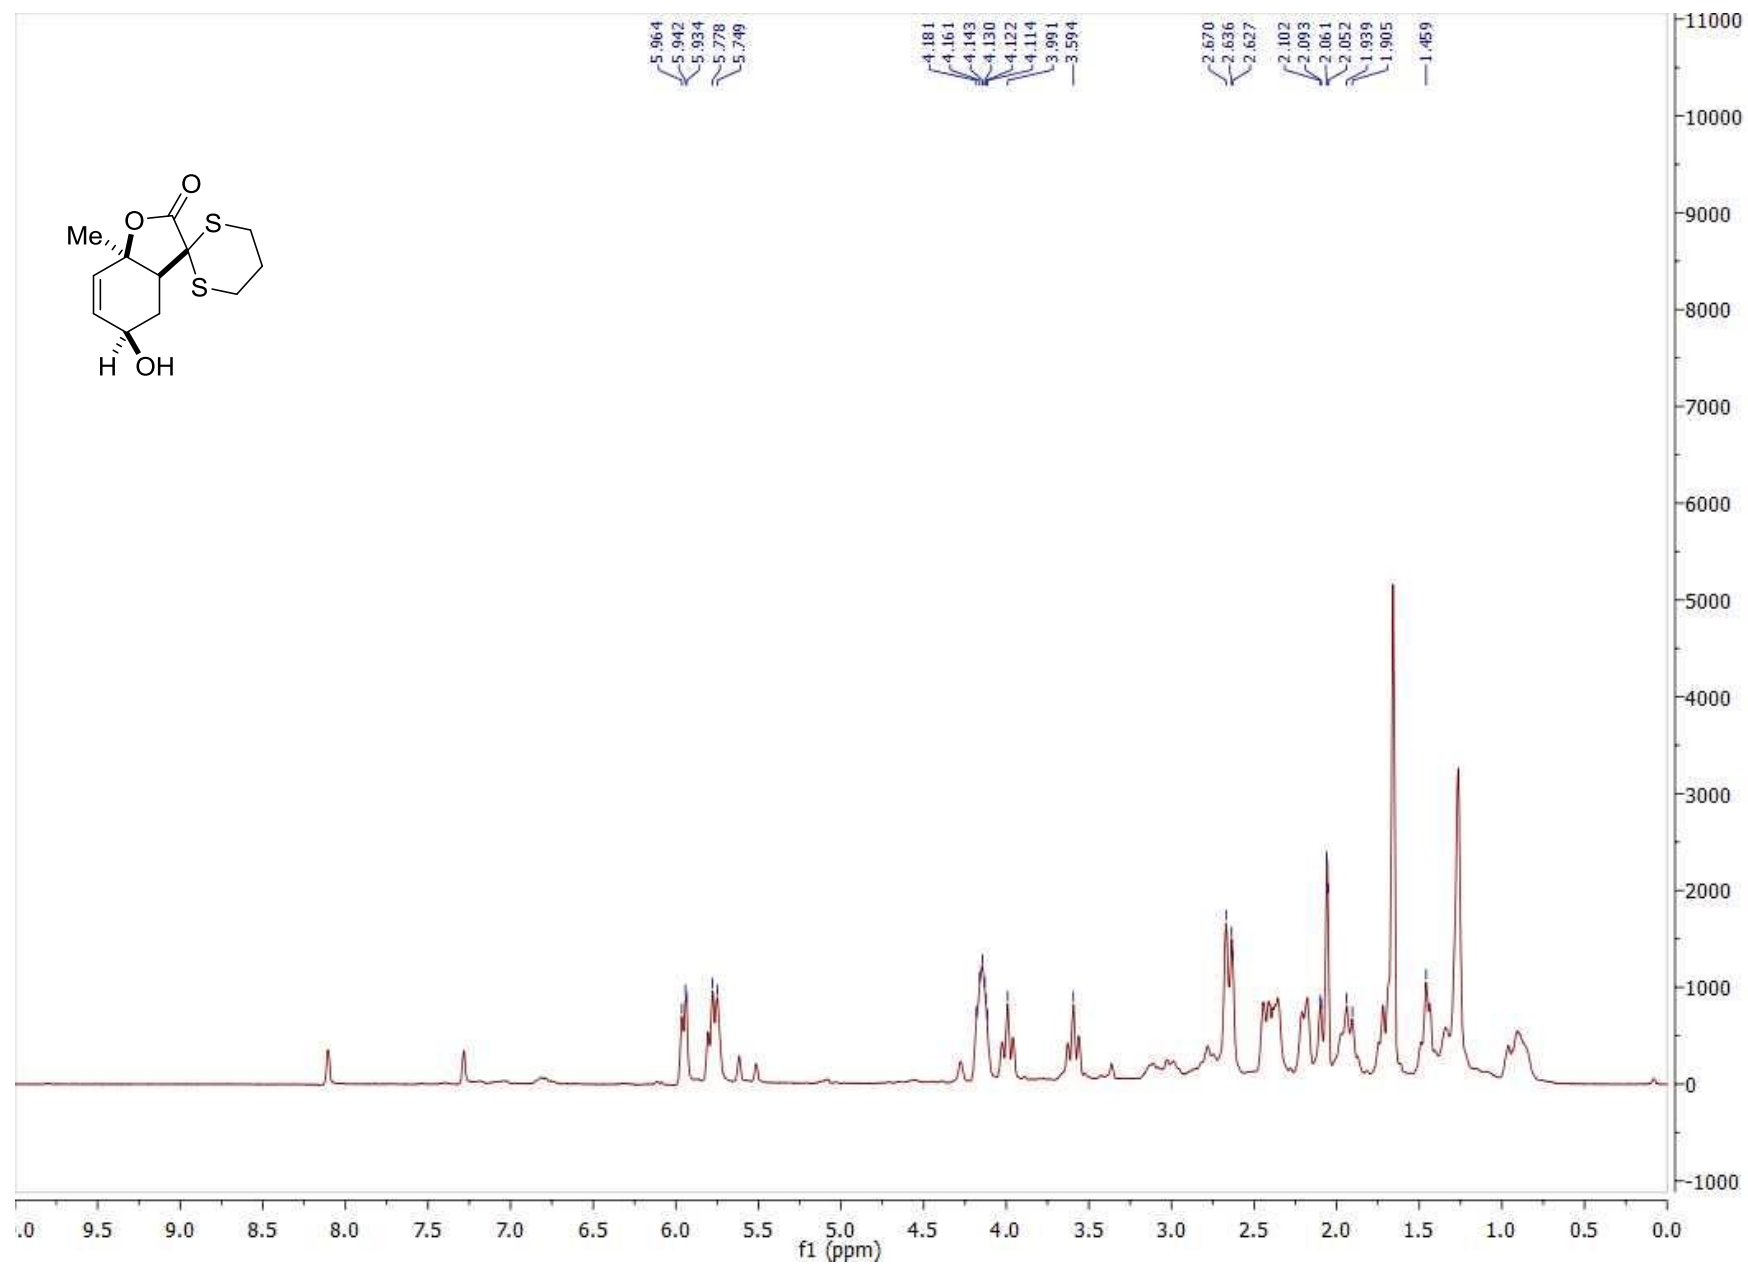

S18

<sup>1</sup>H and <sup>13</sup>C NMR spectra of new compounds:

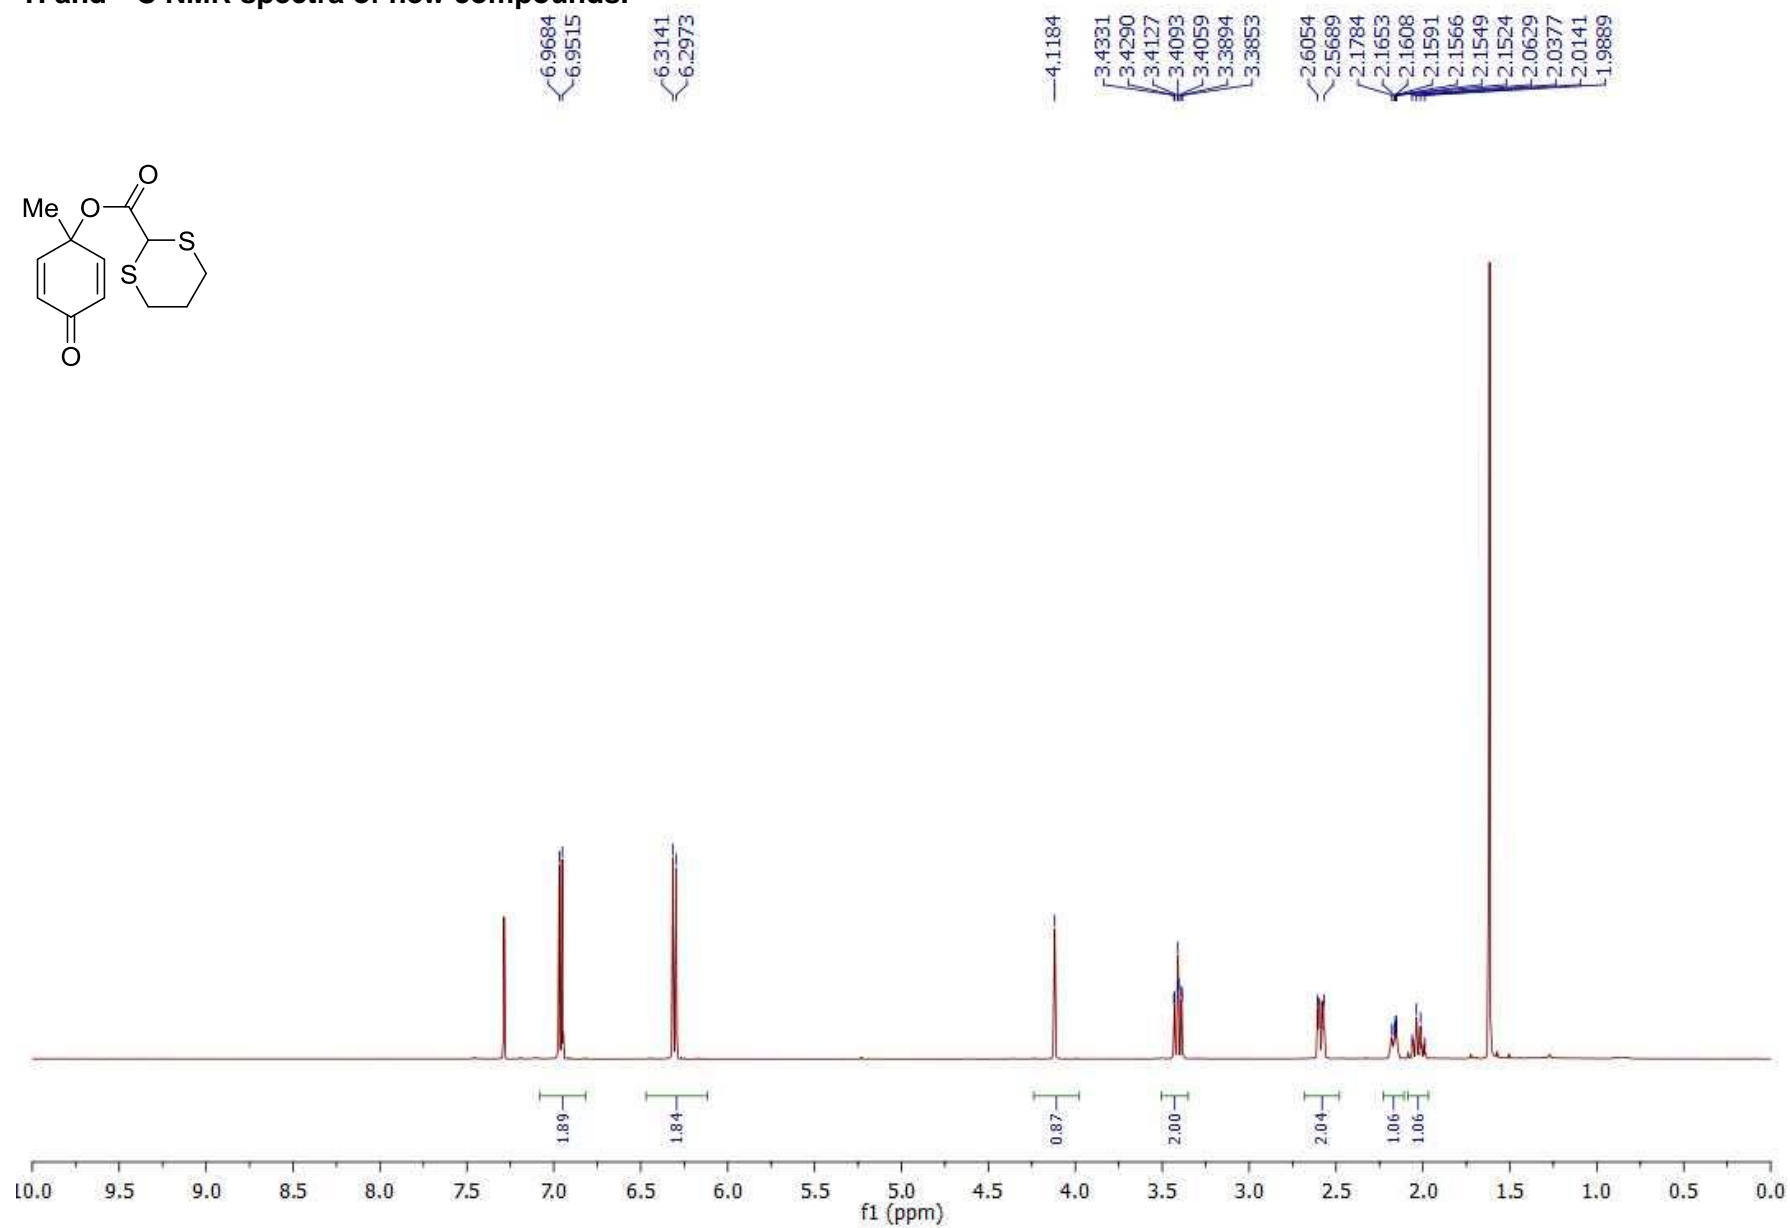

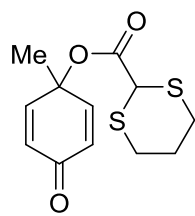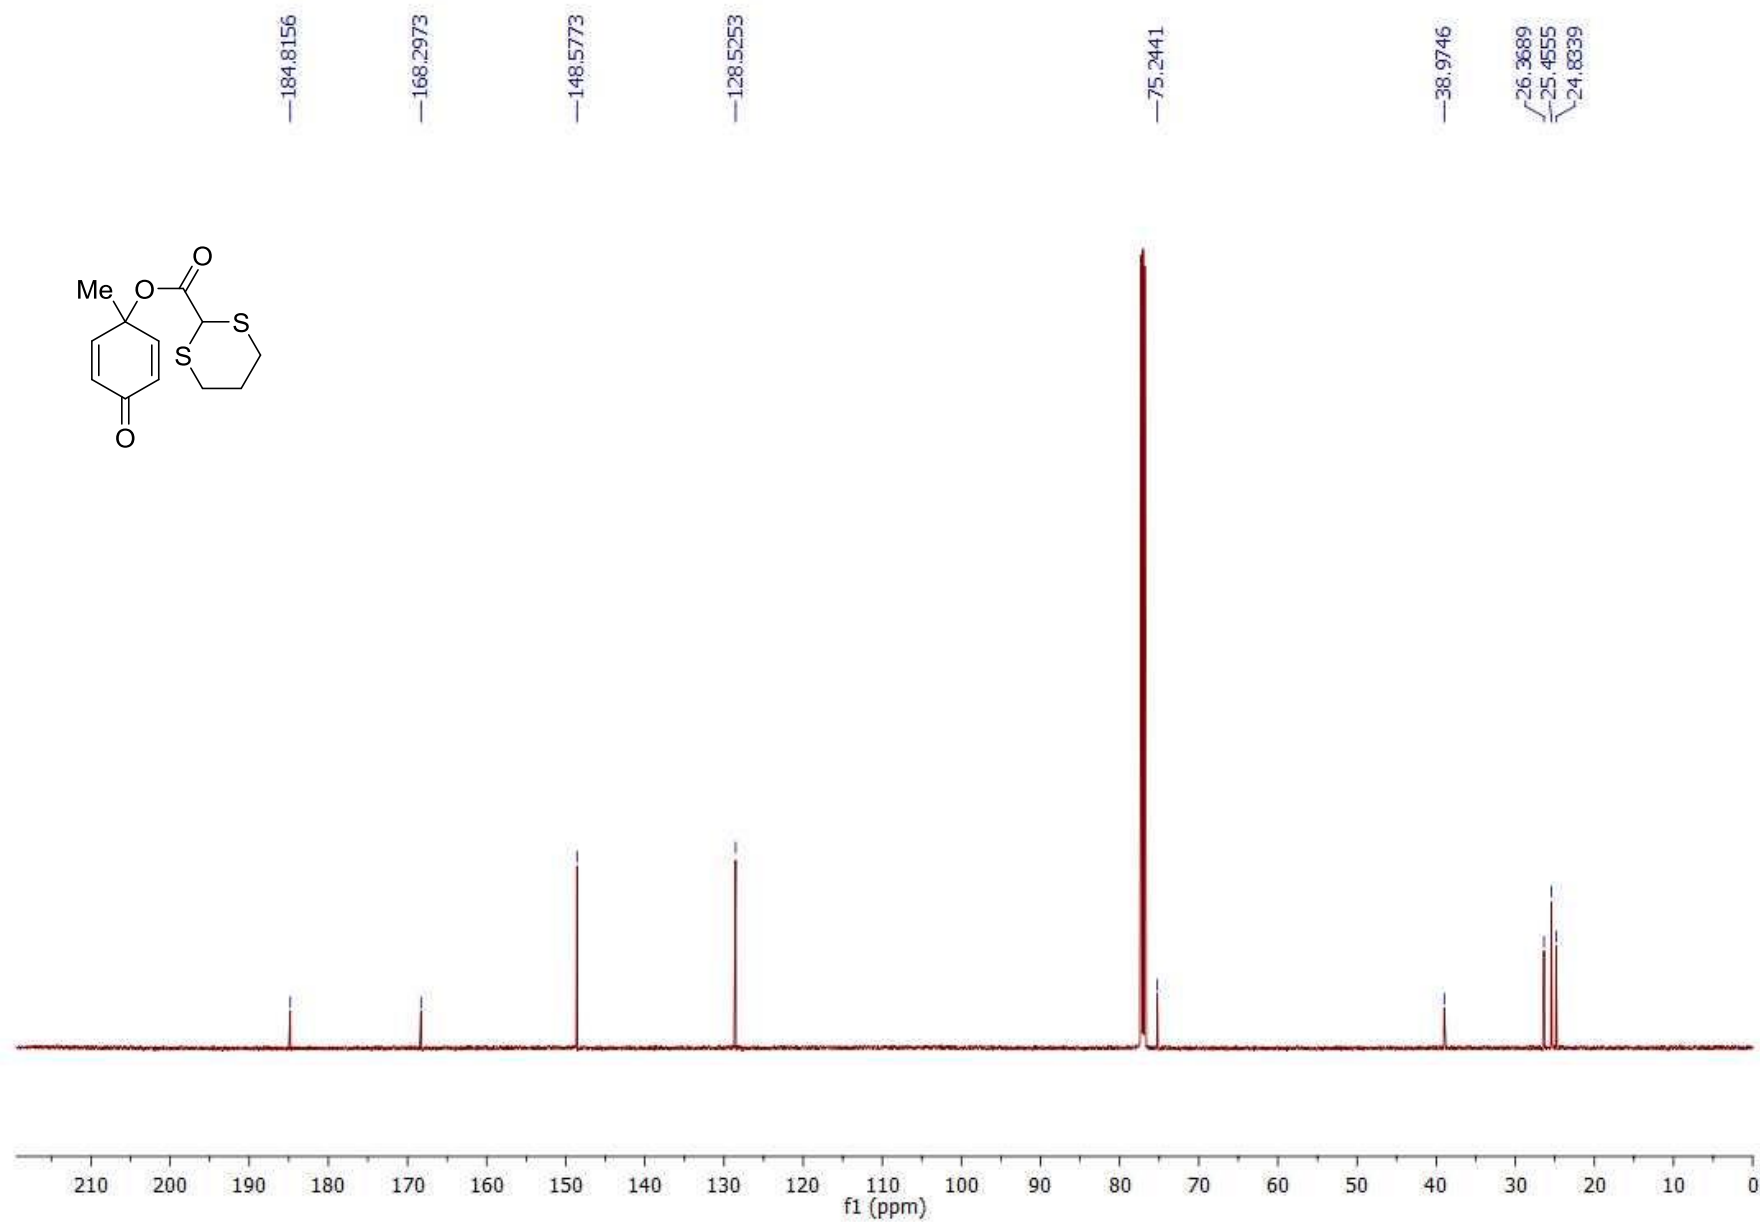

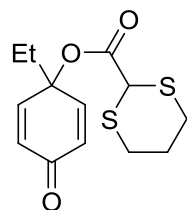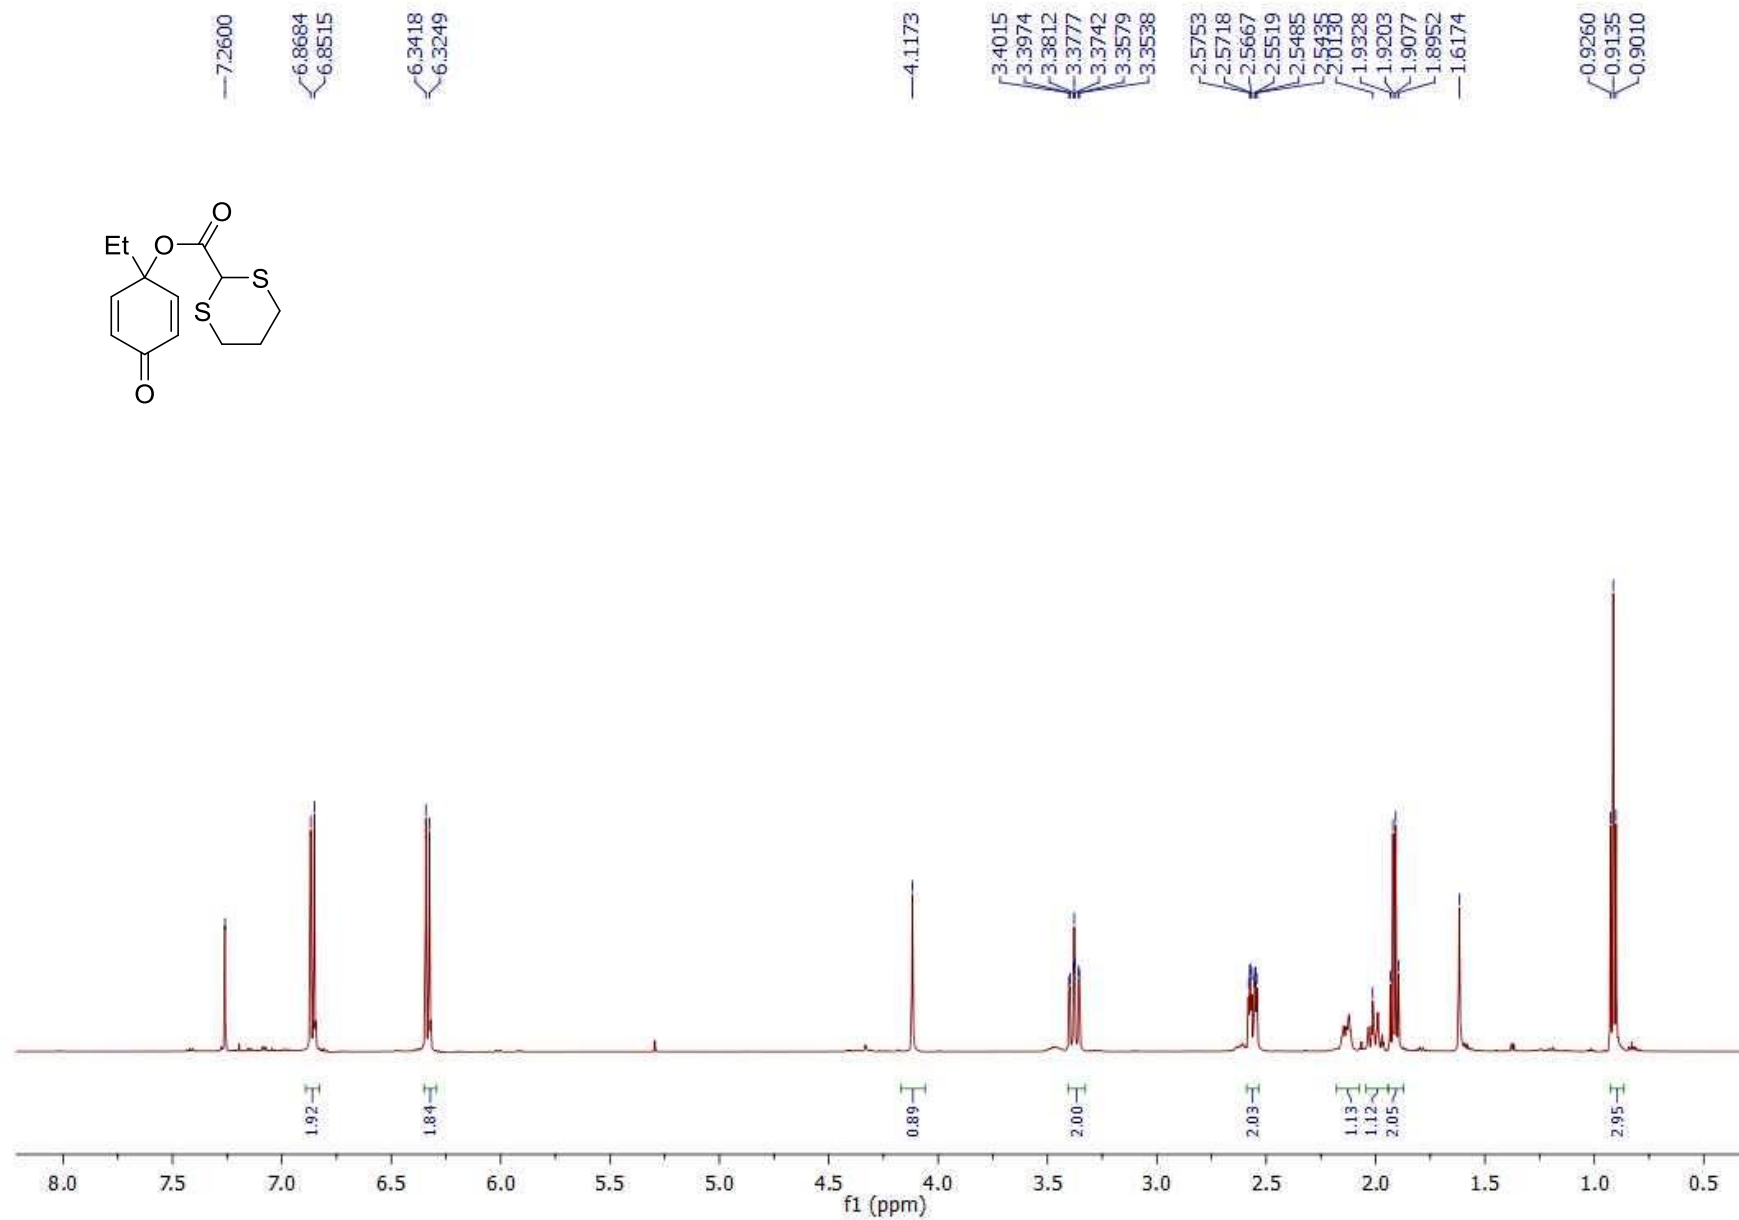

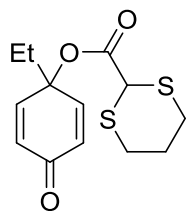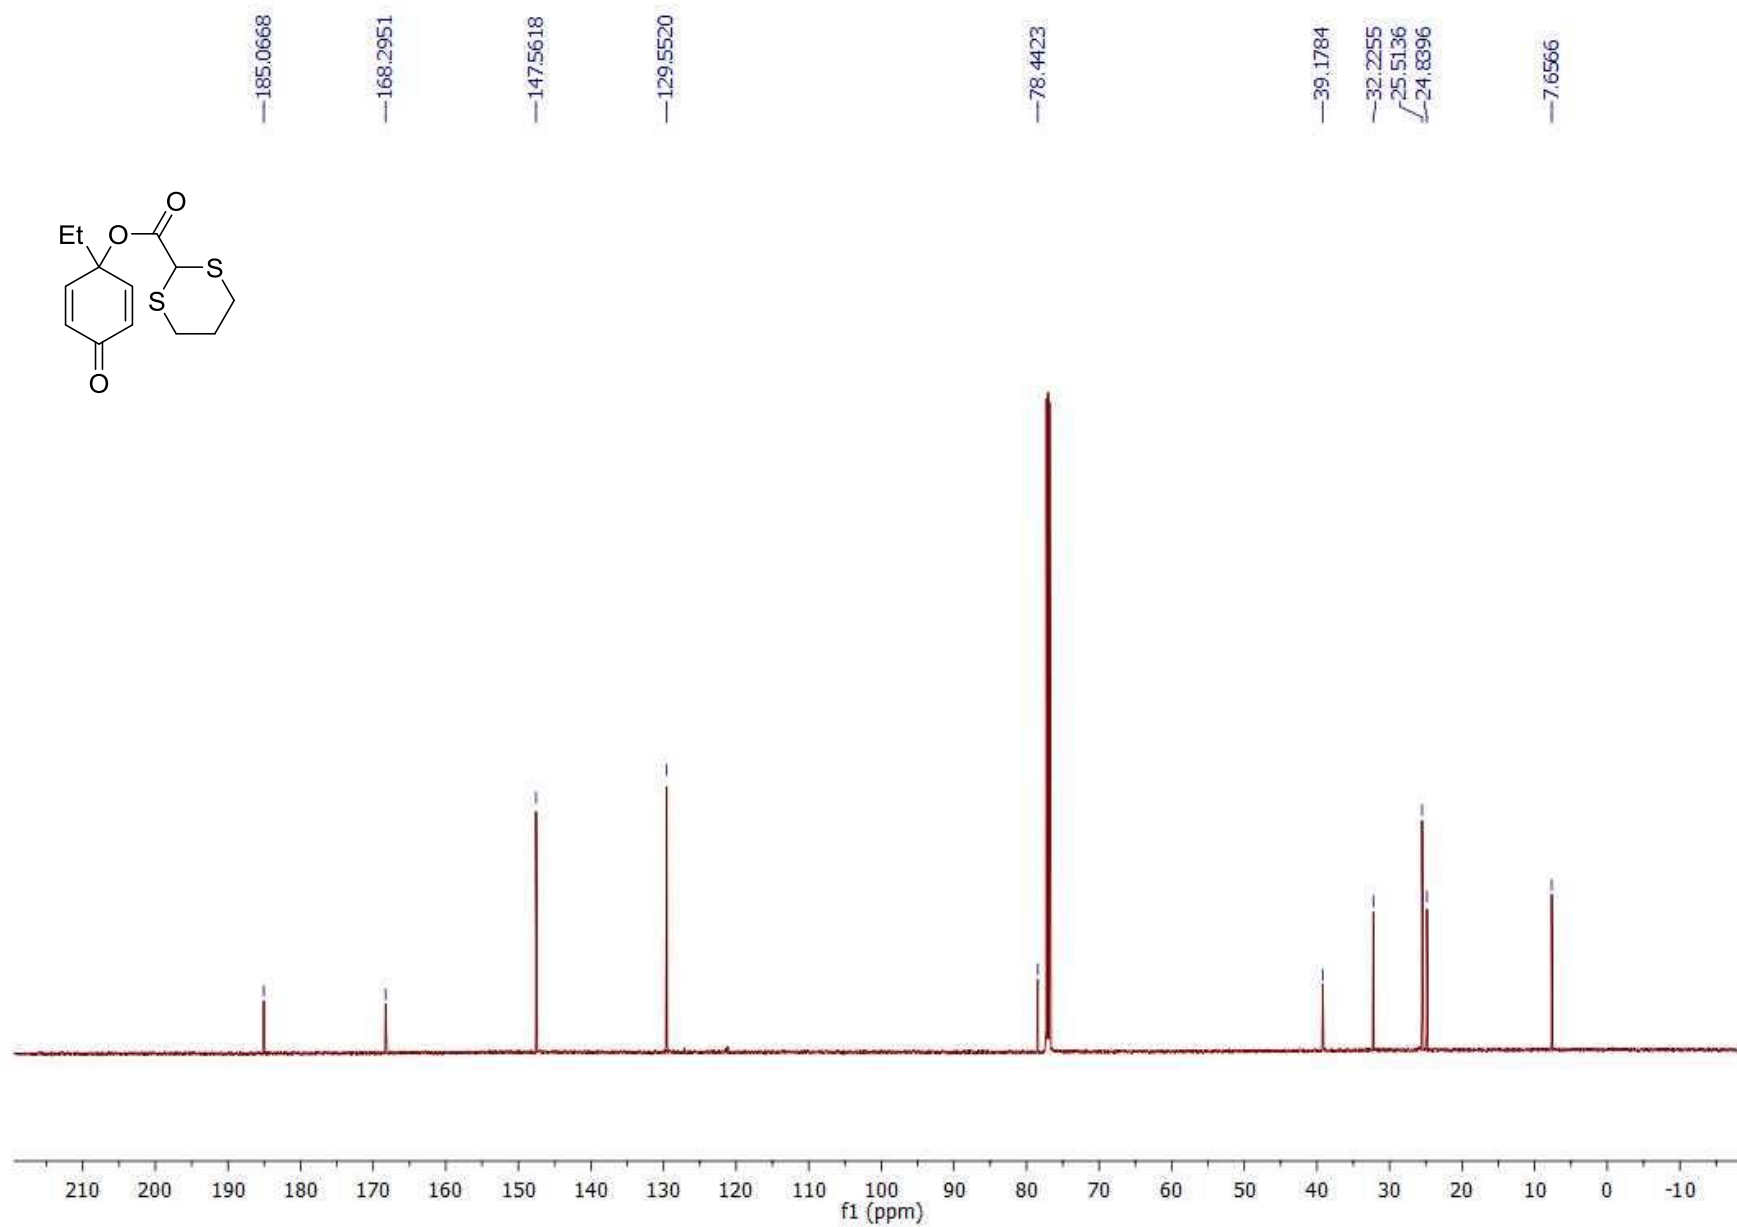

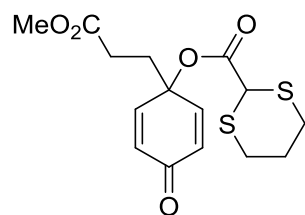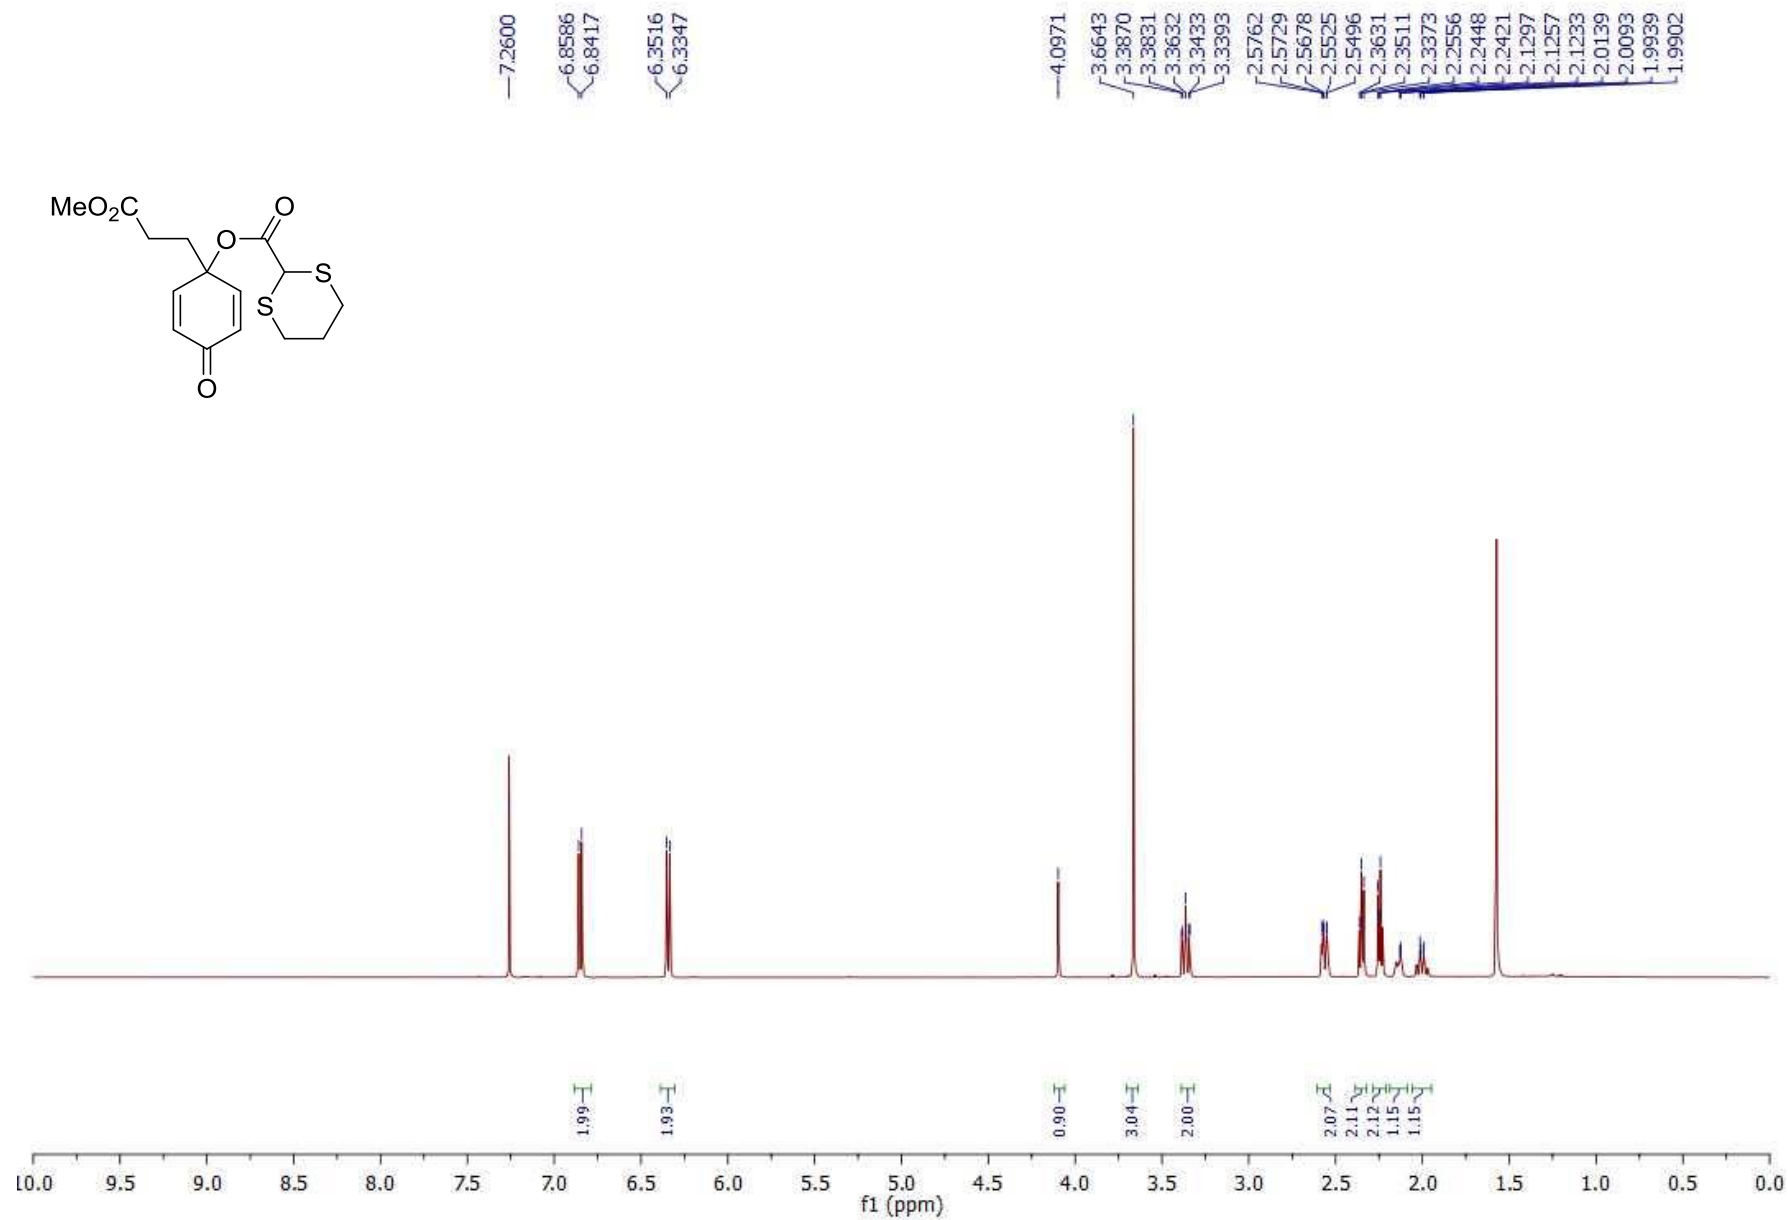

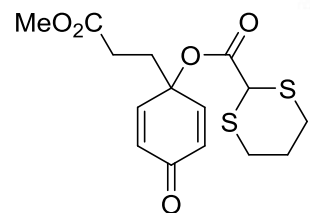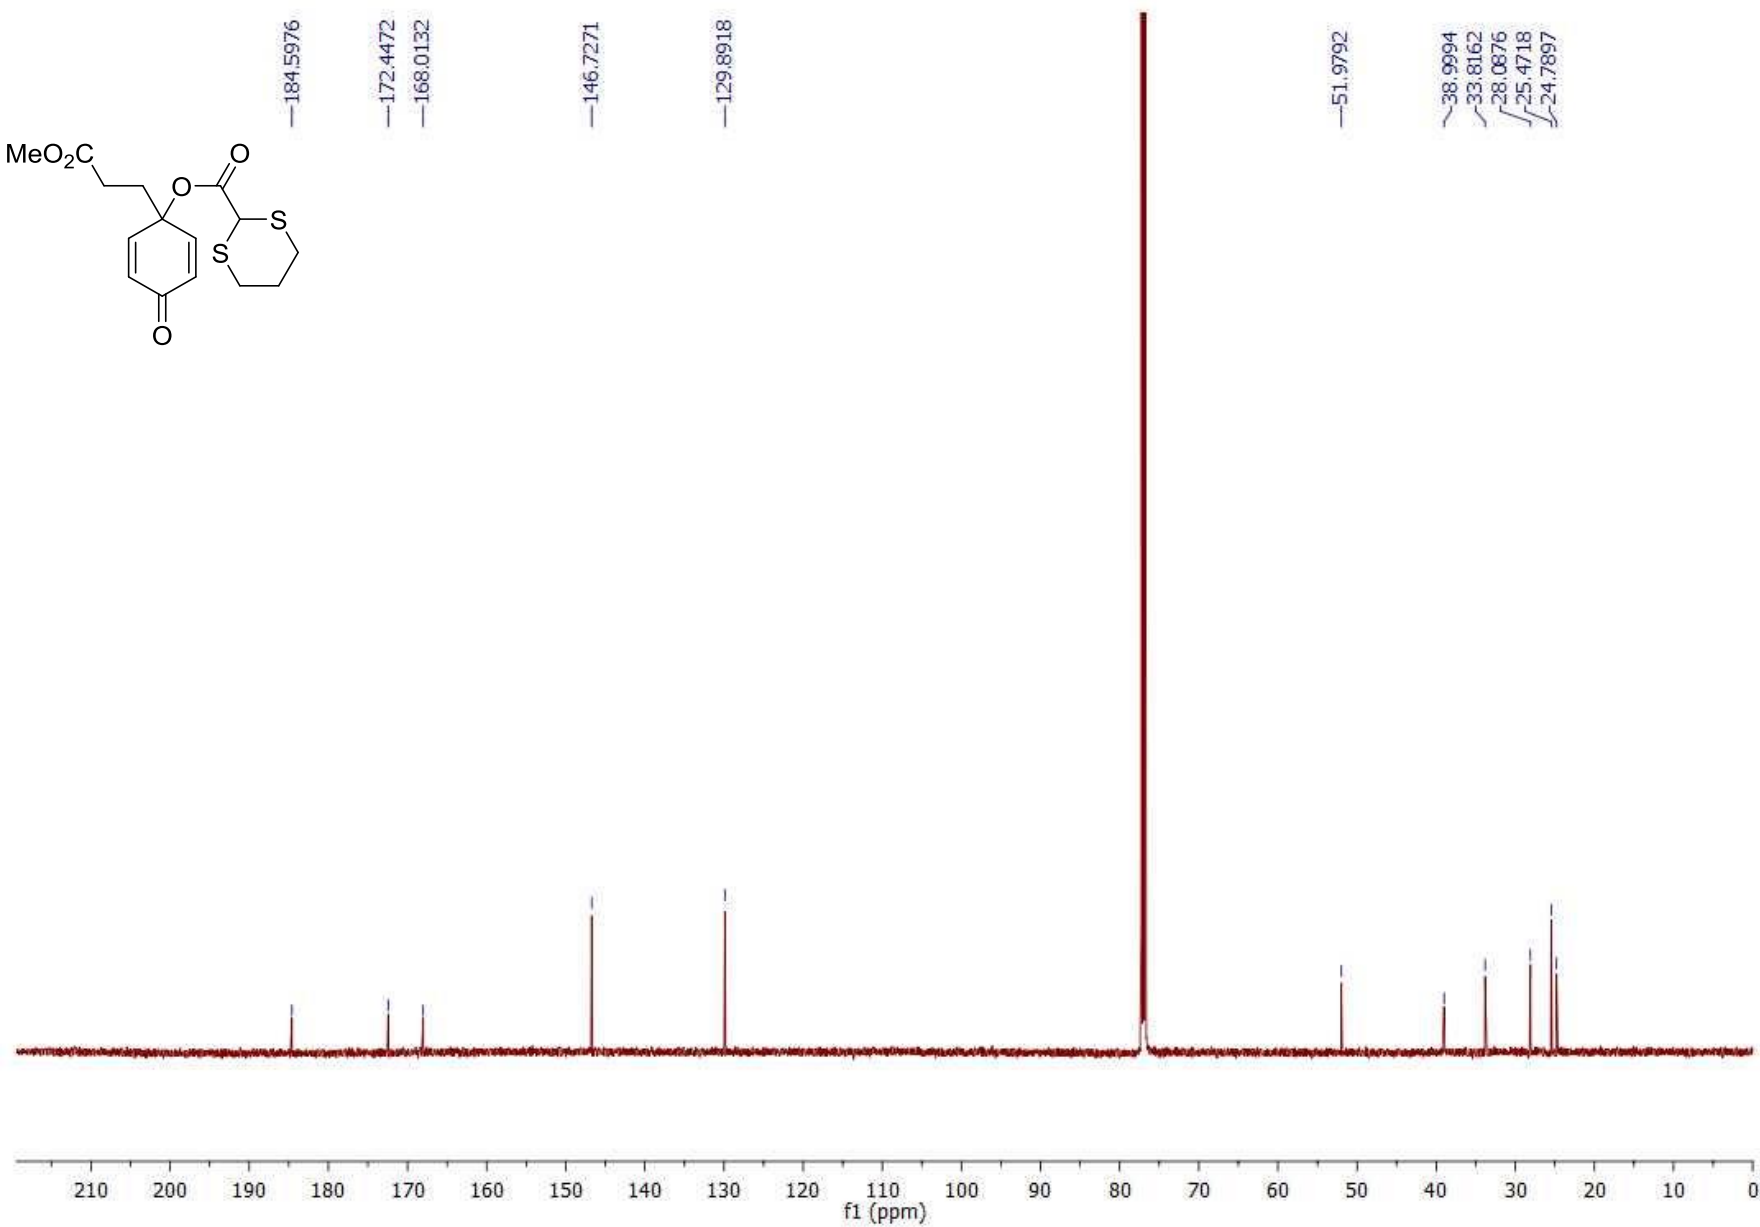



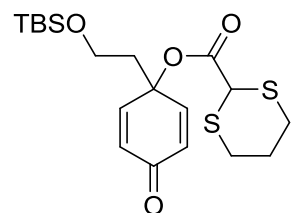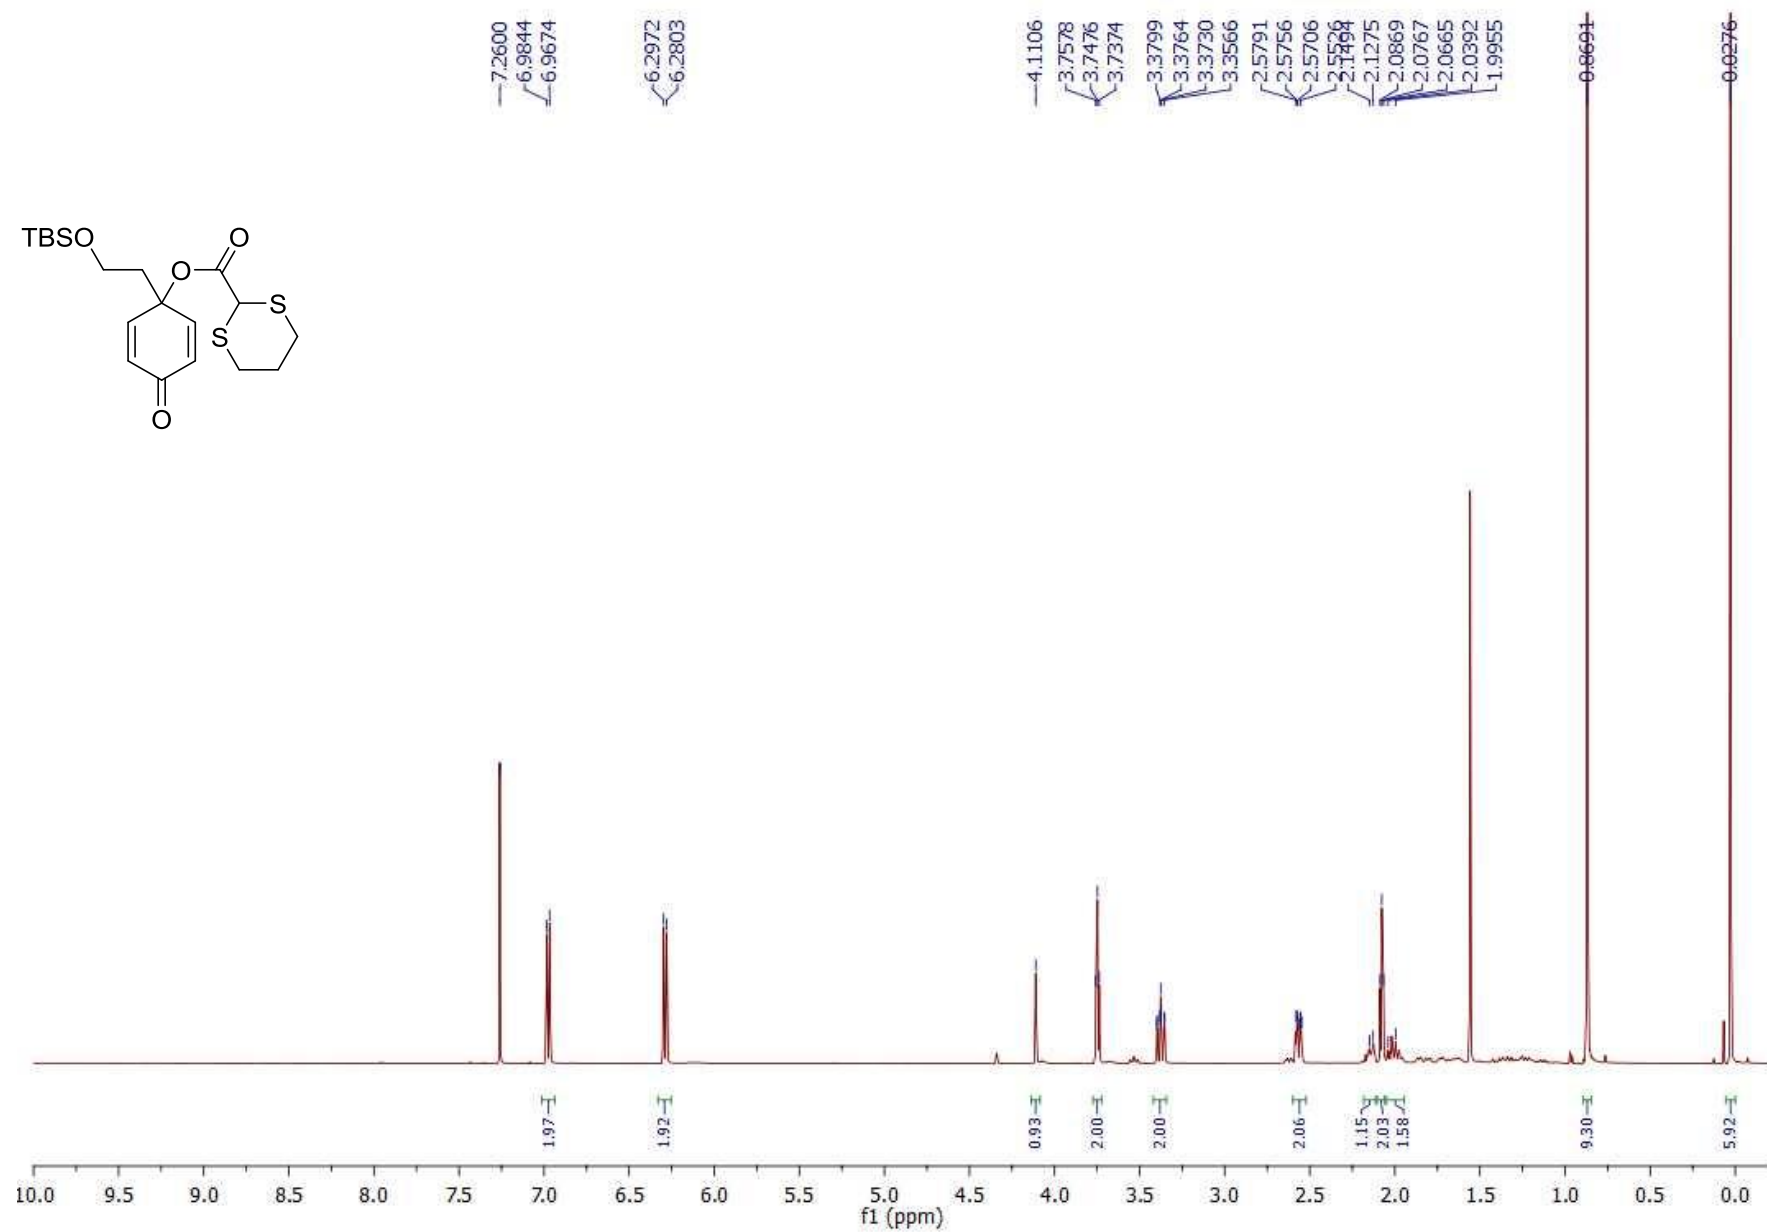

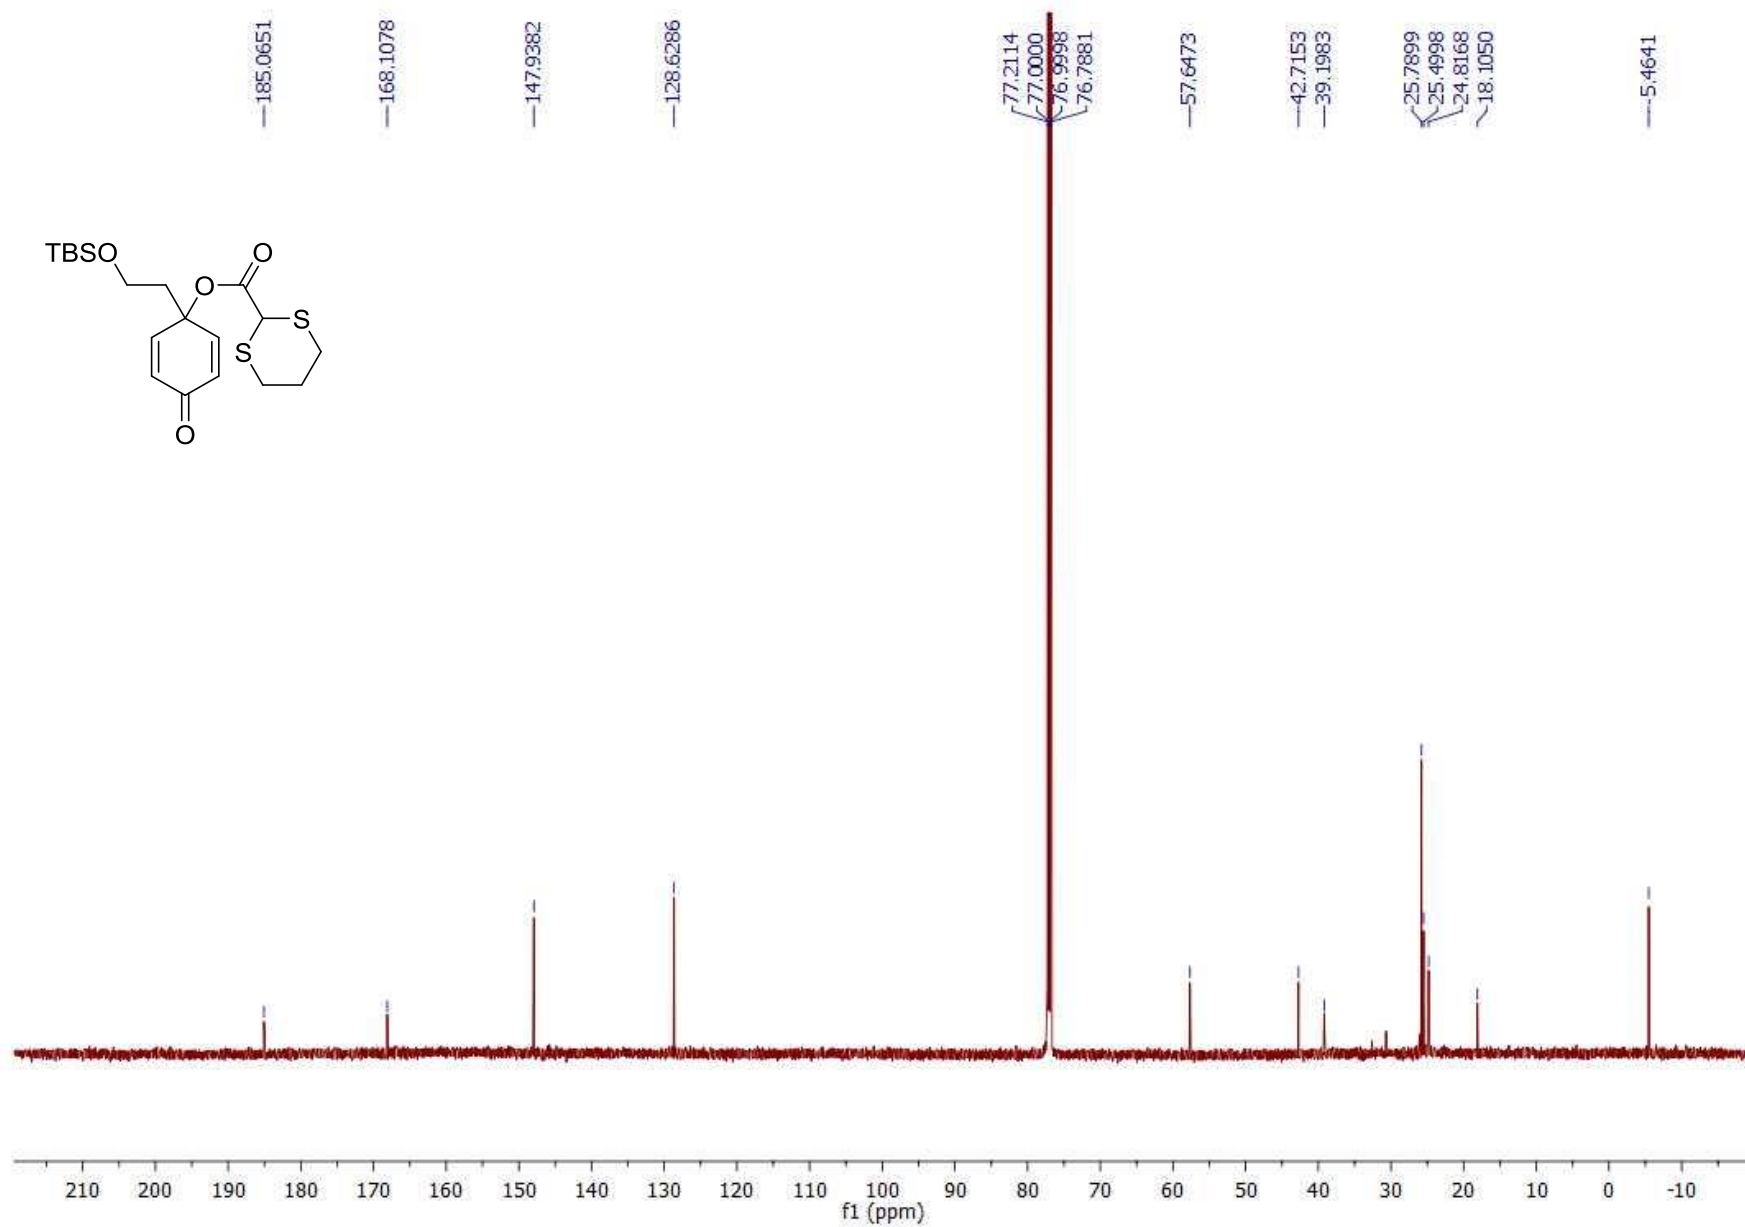

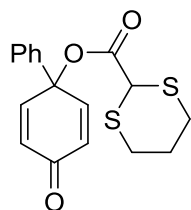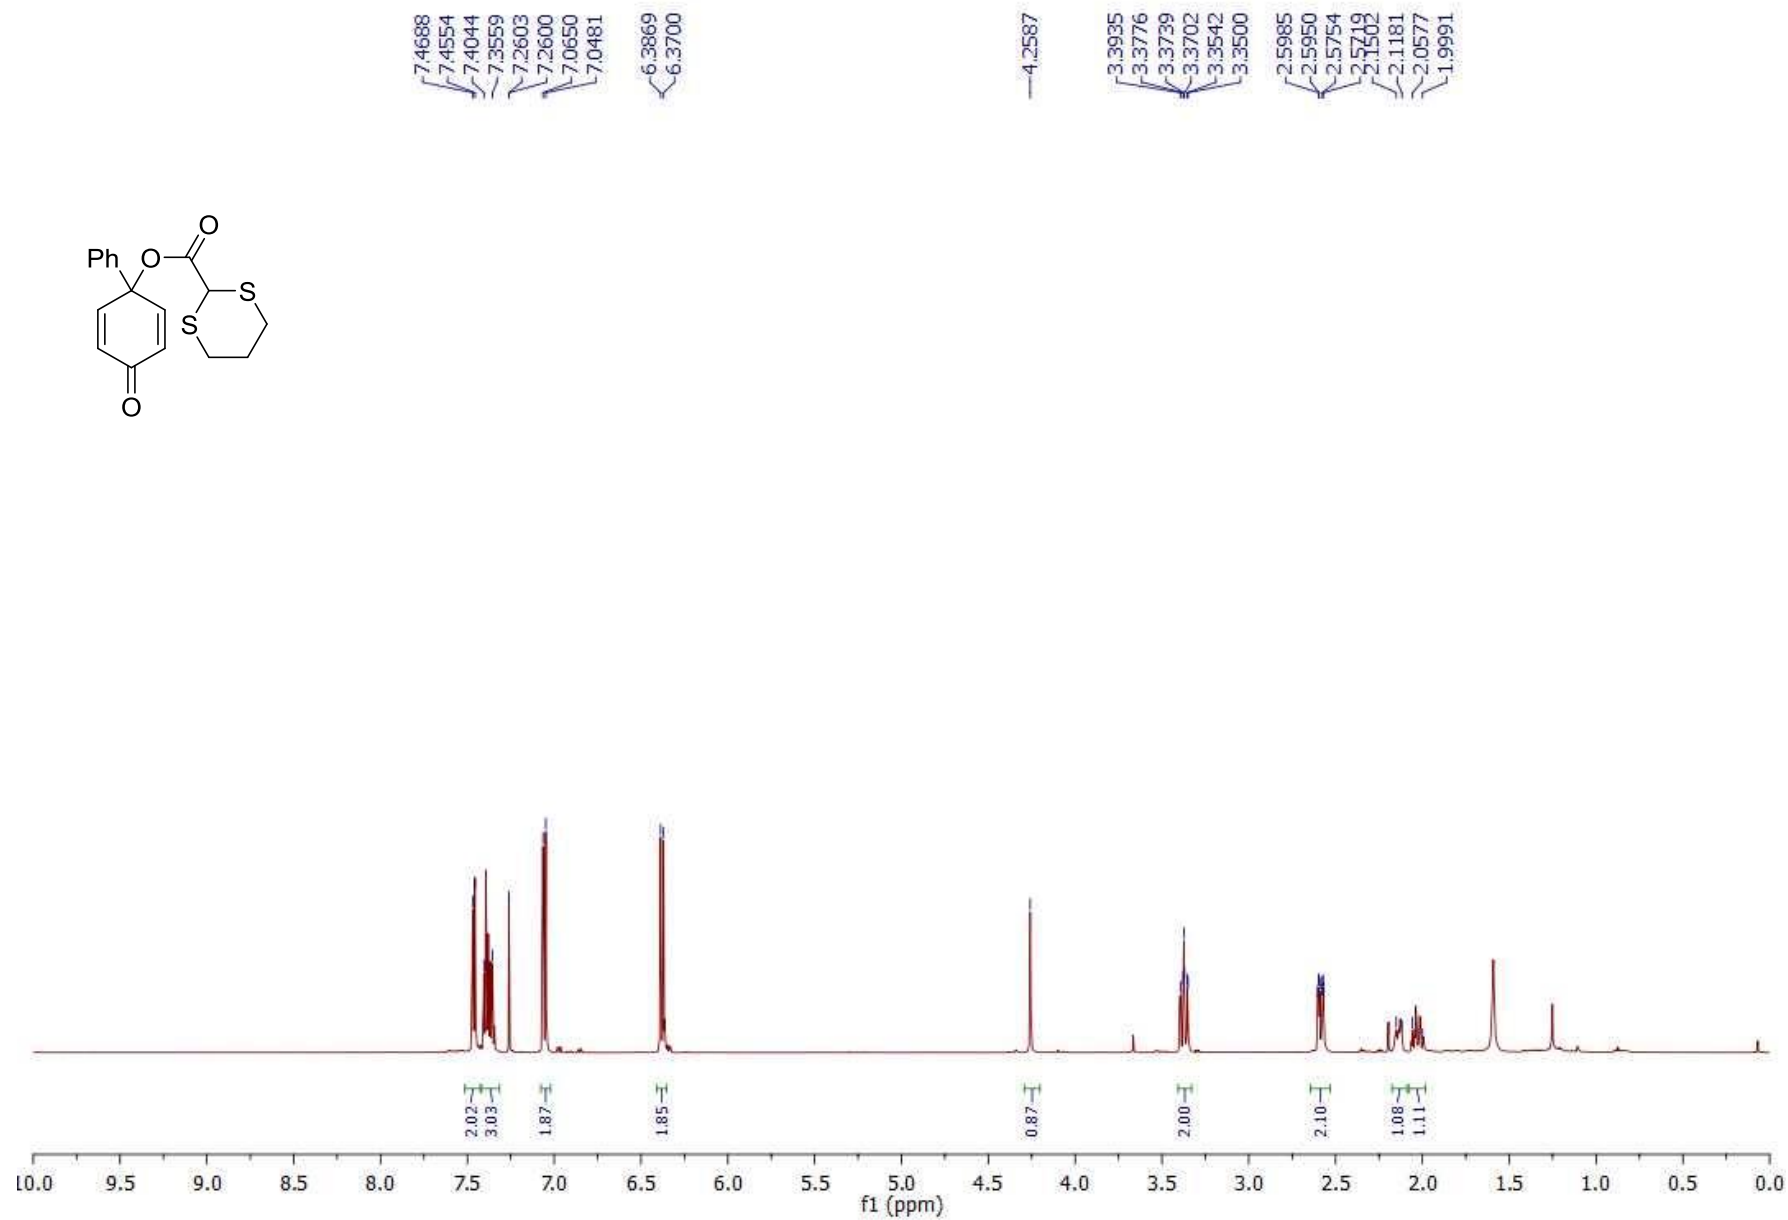

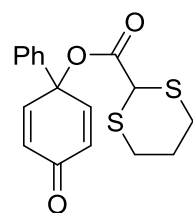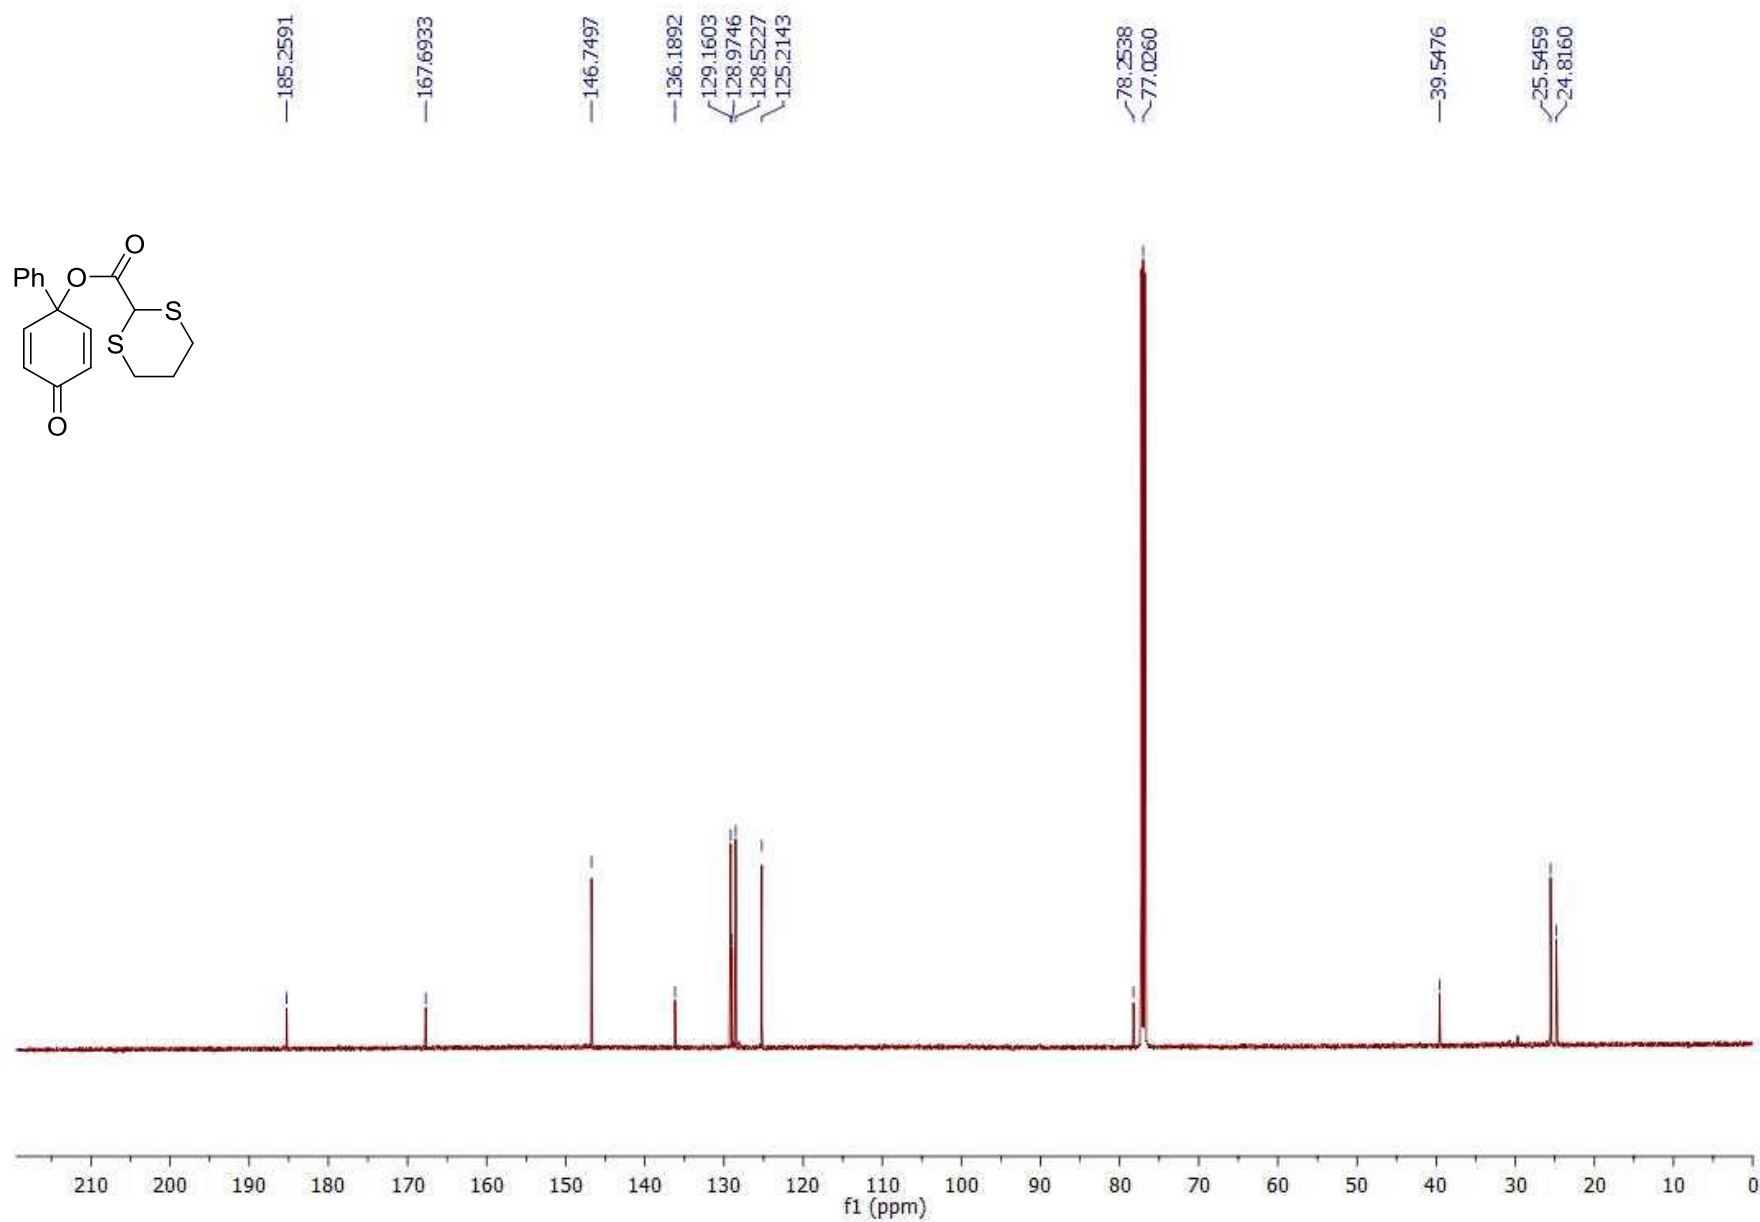

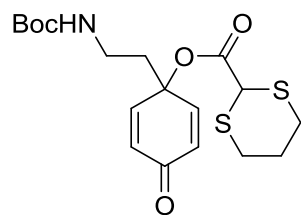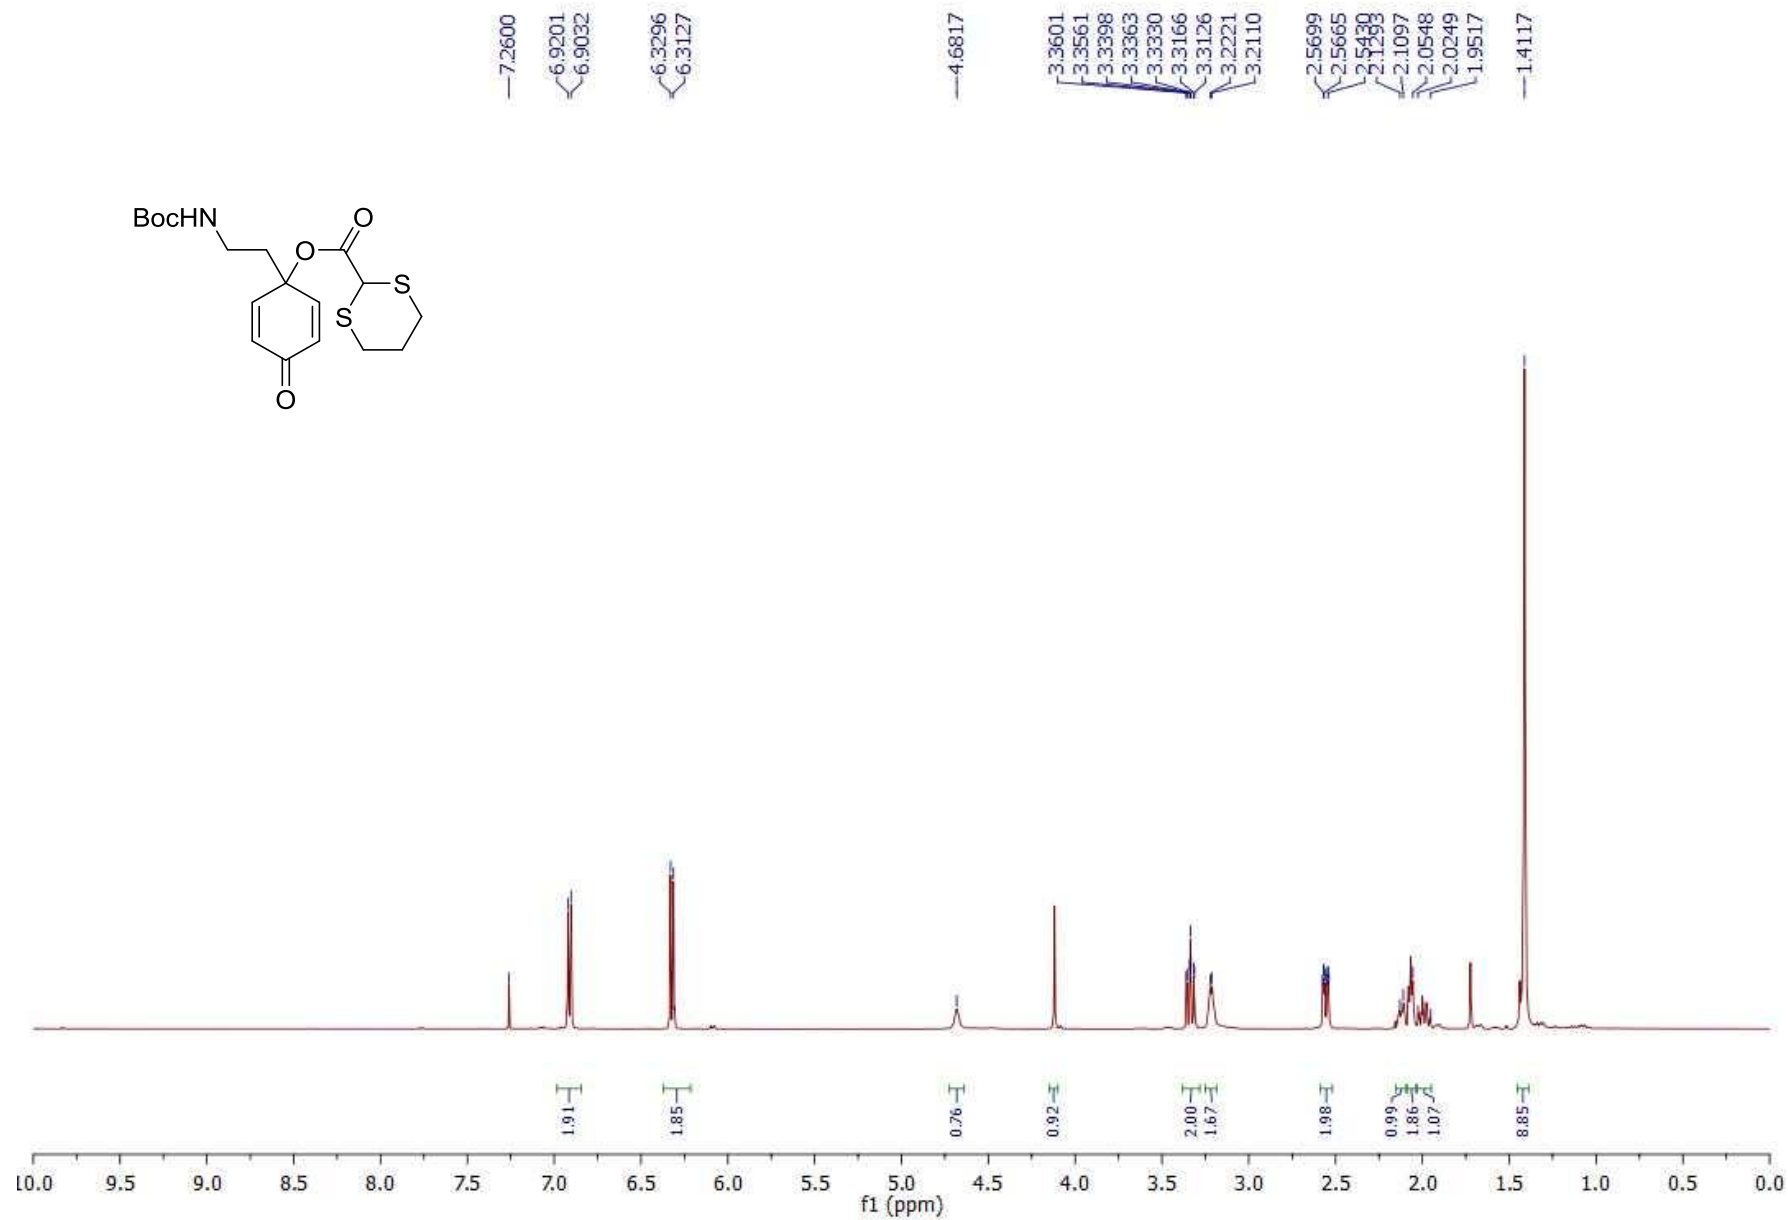

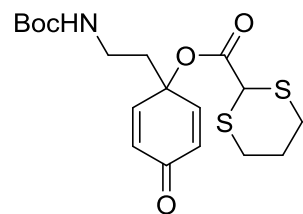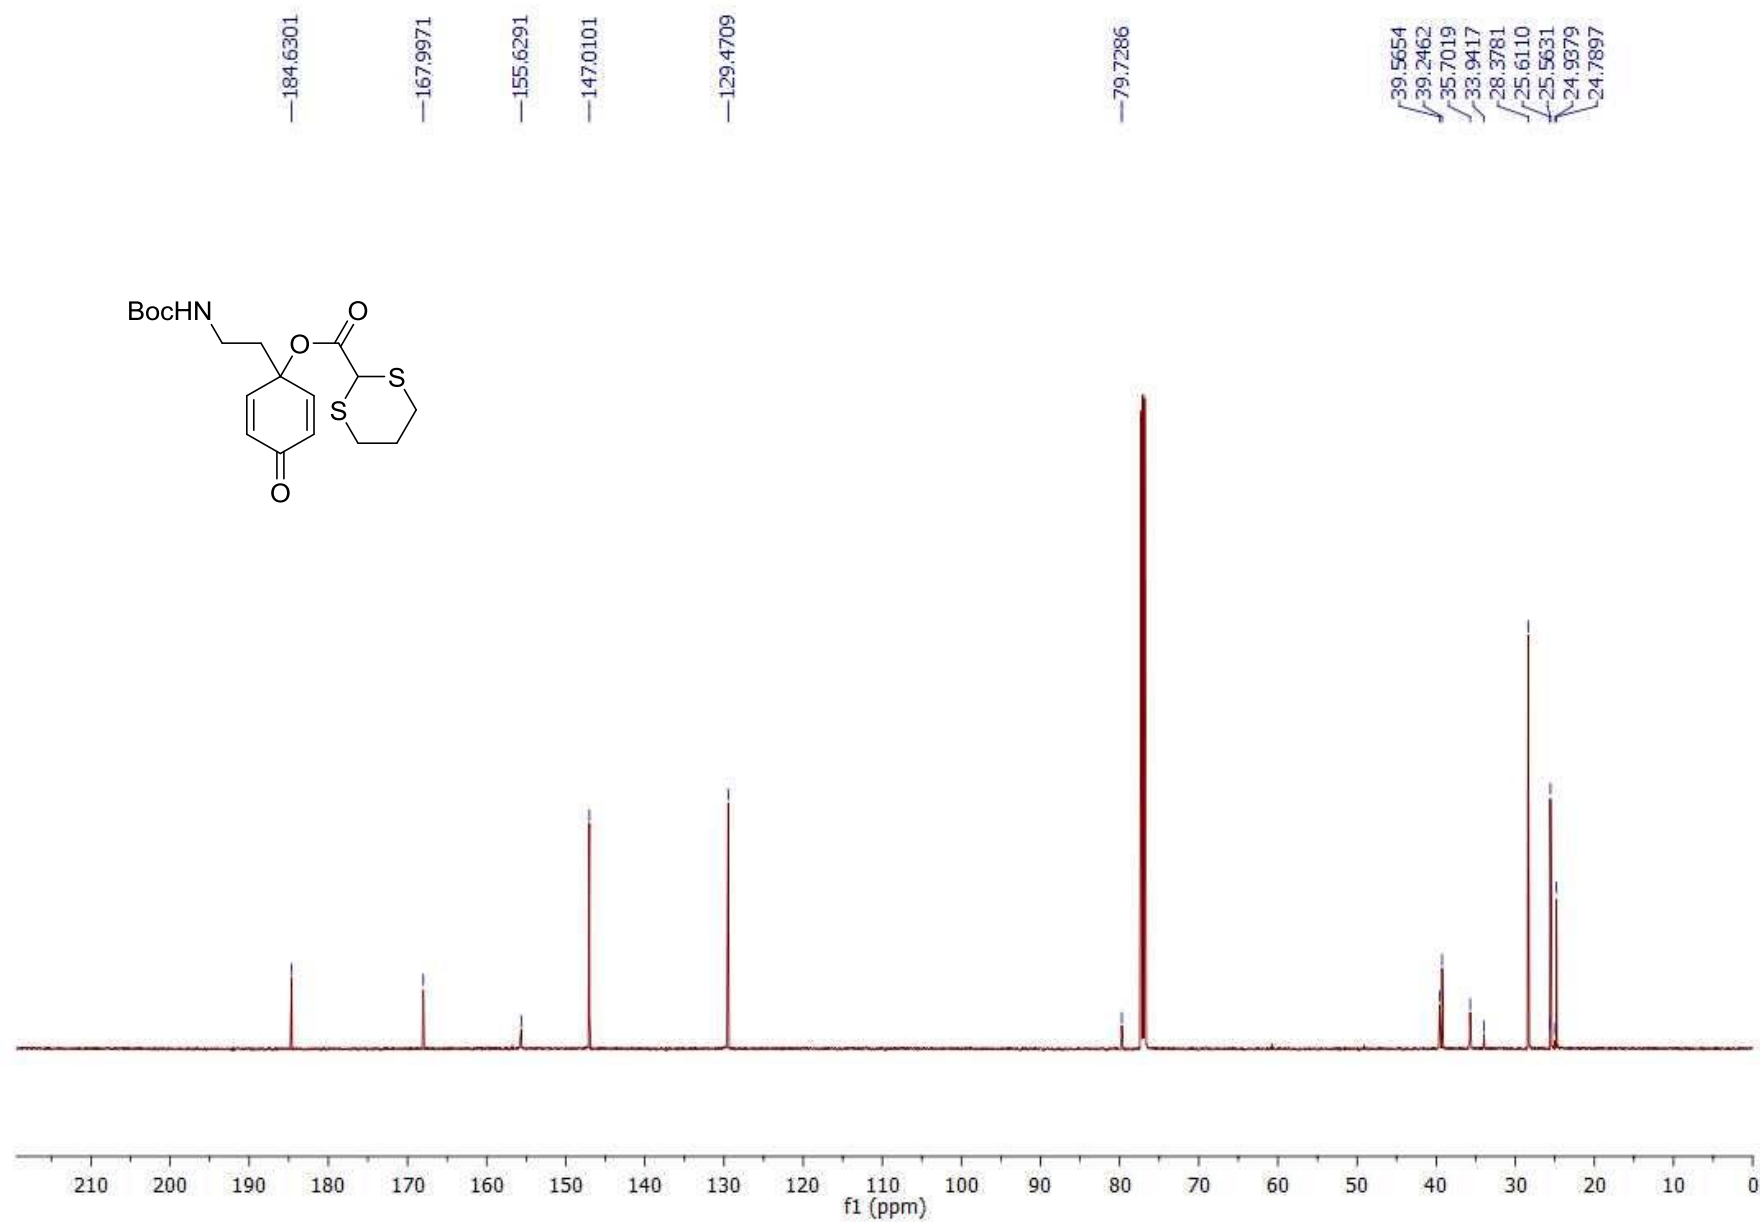

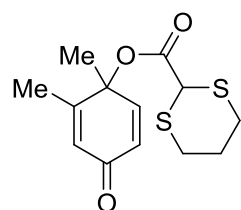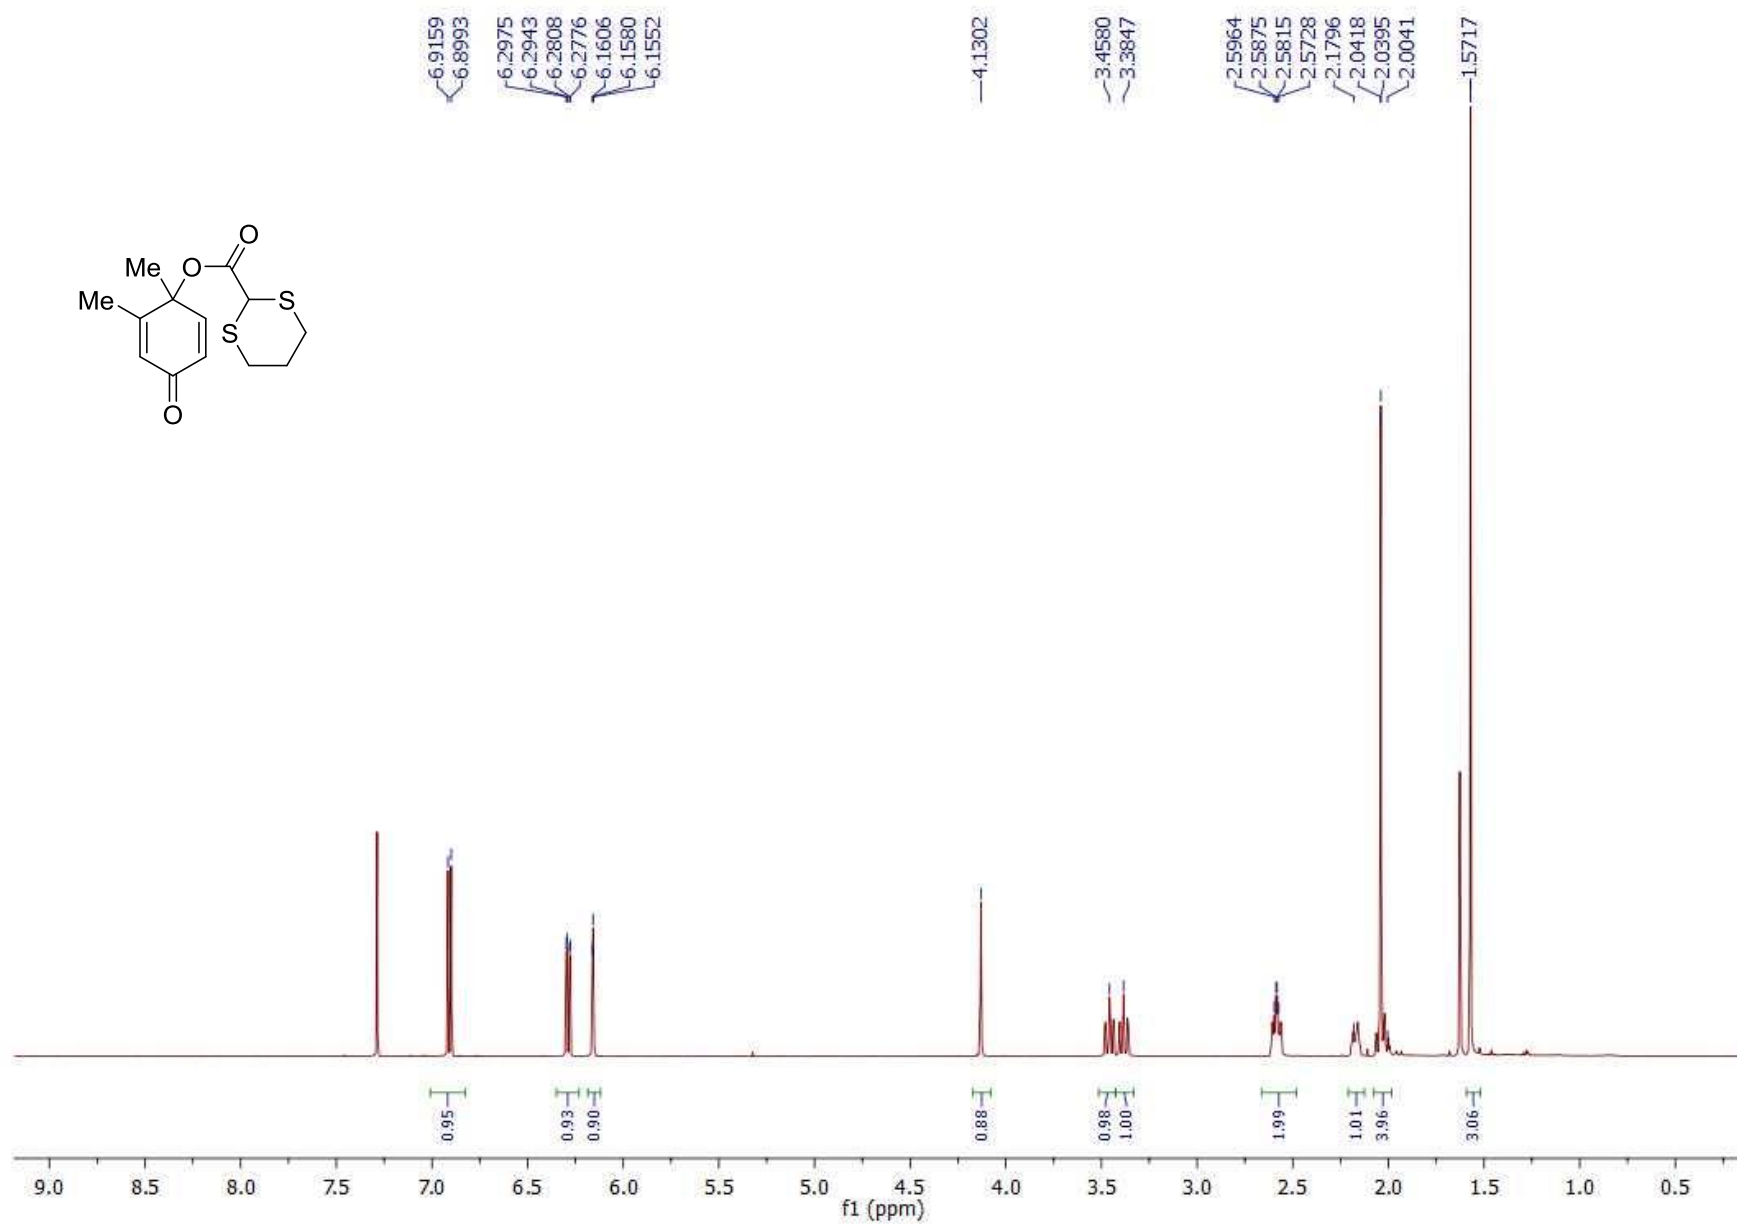

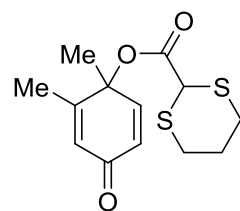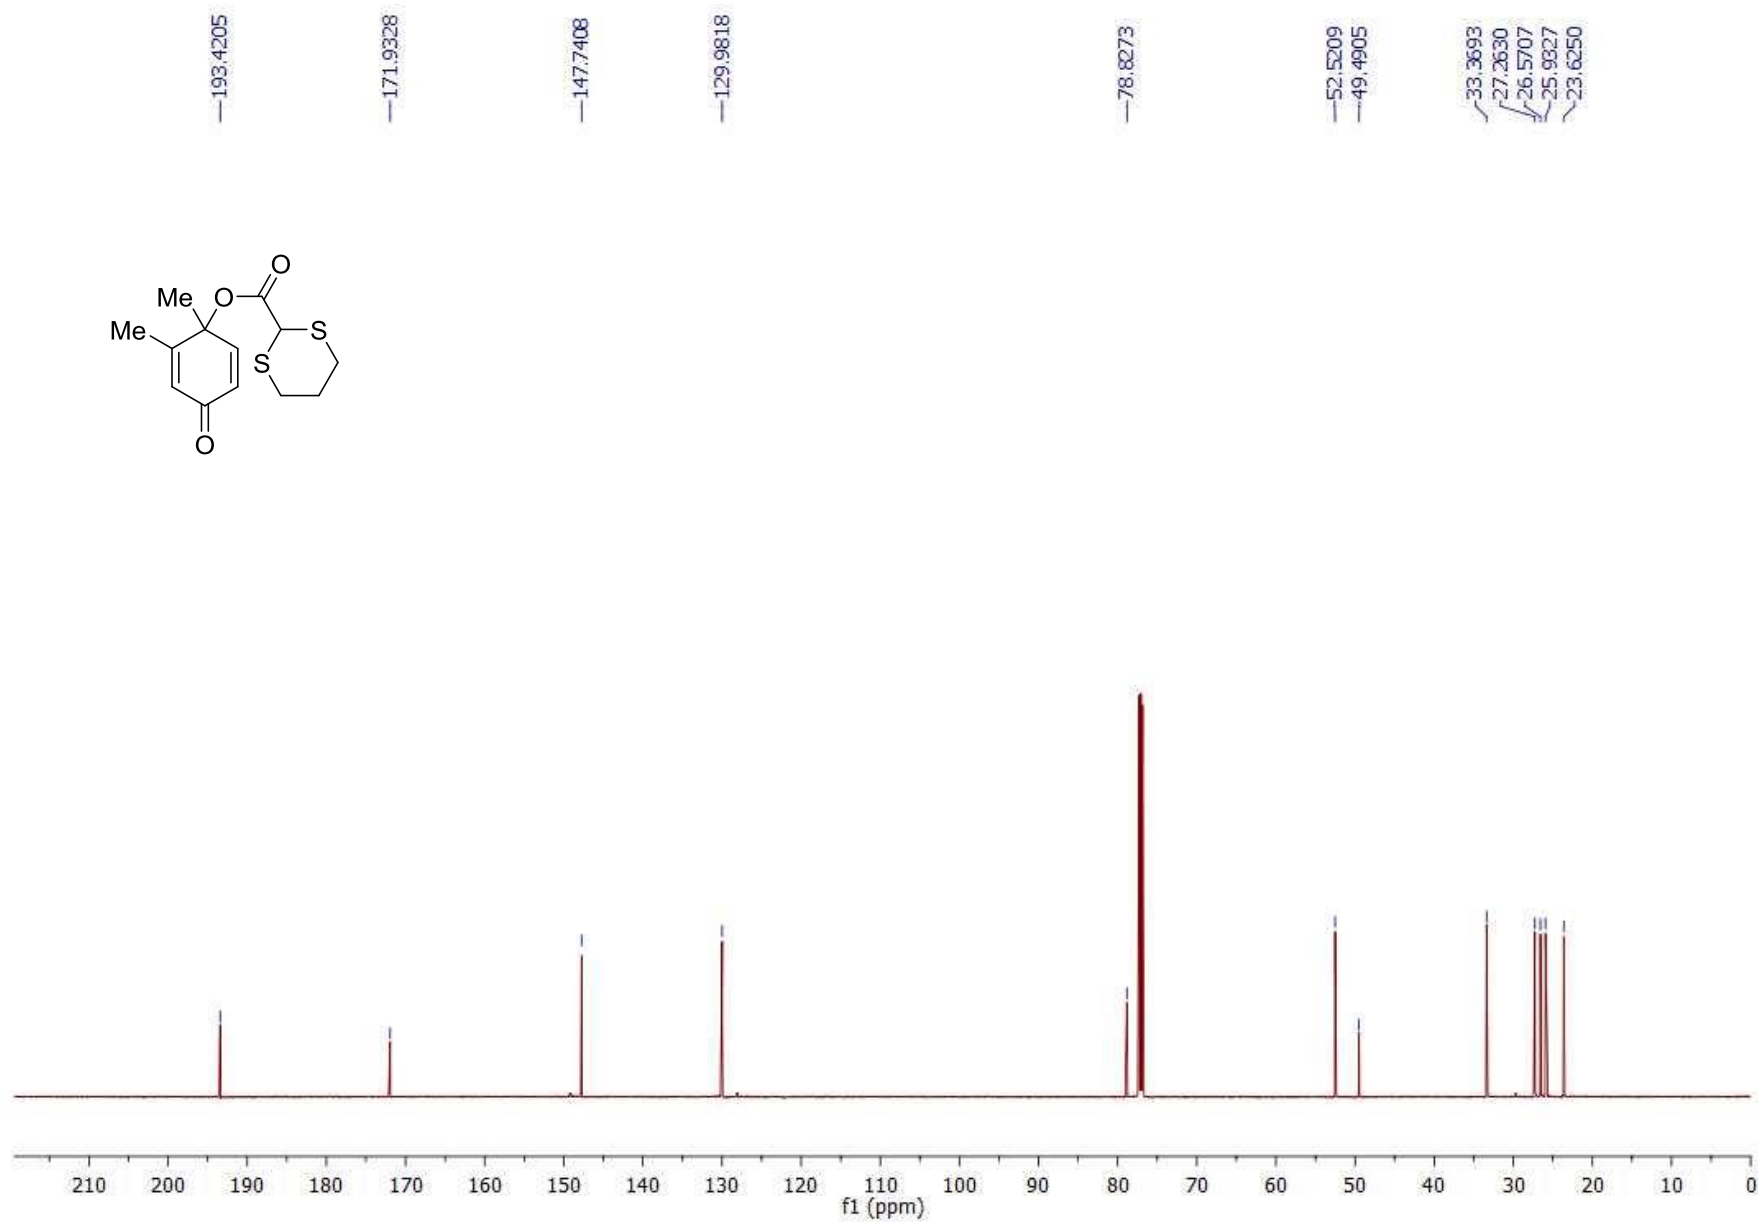



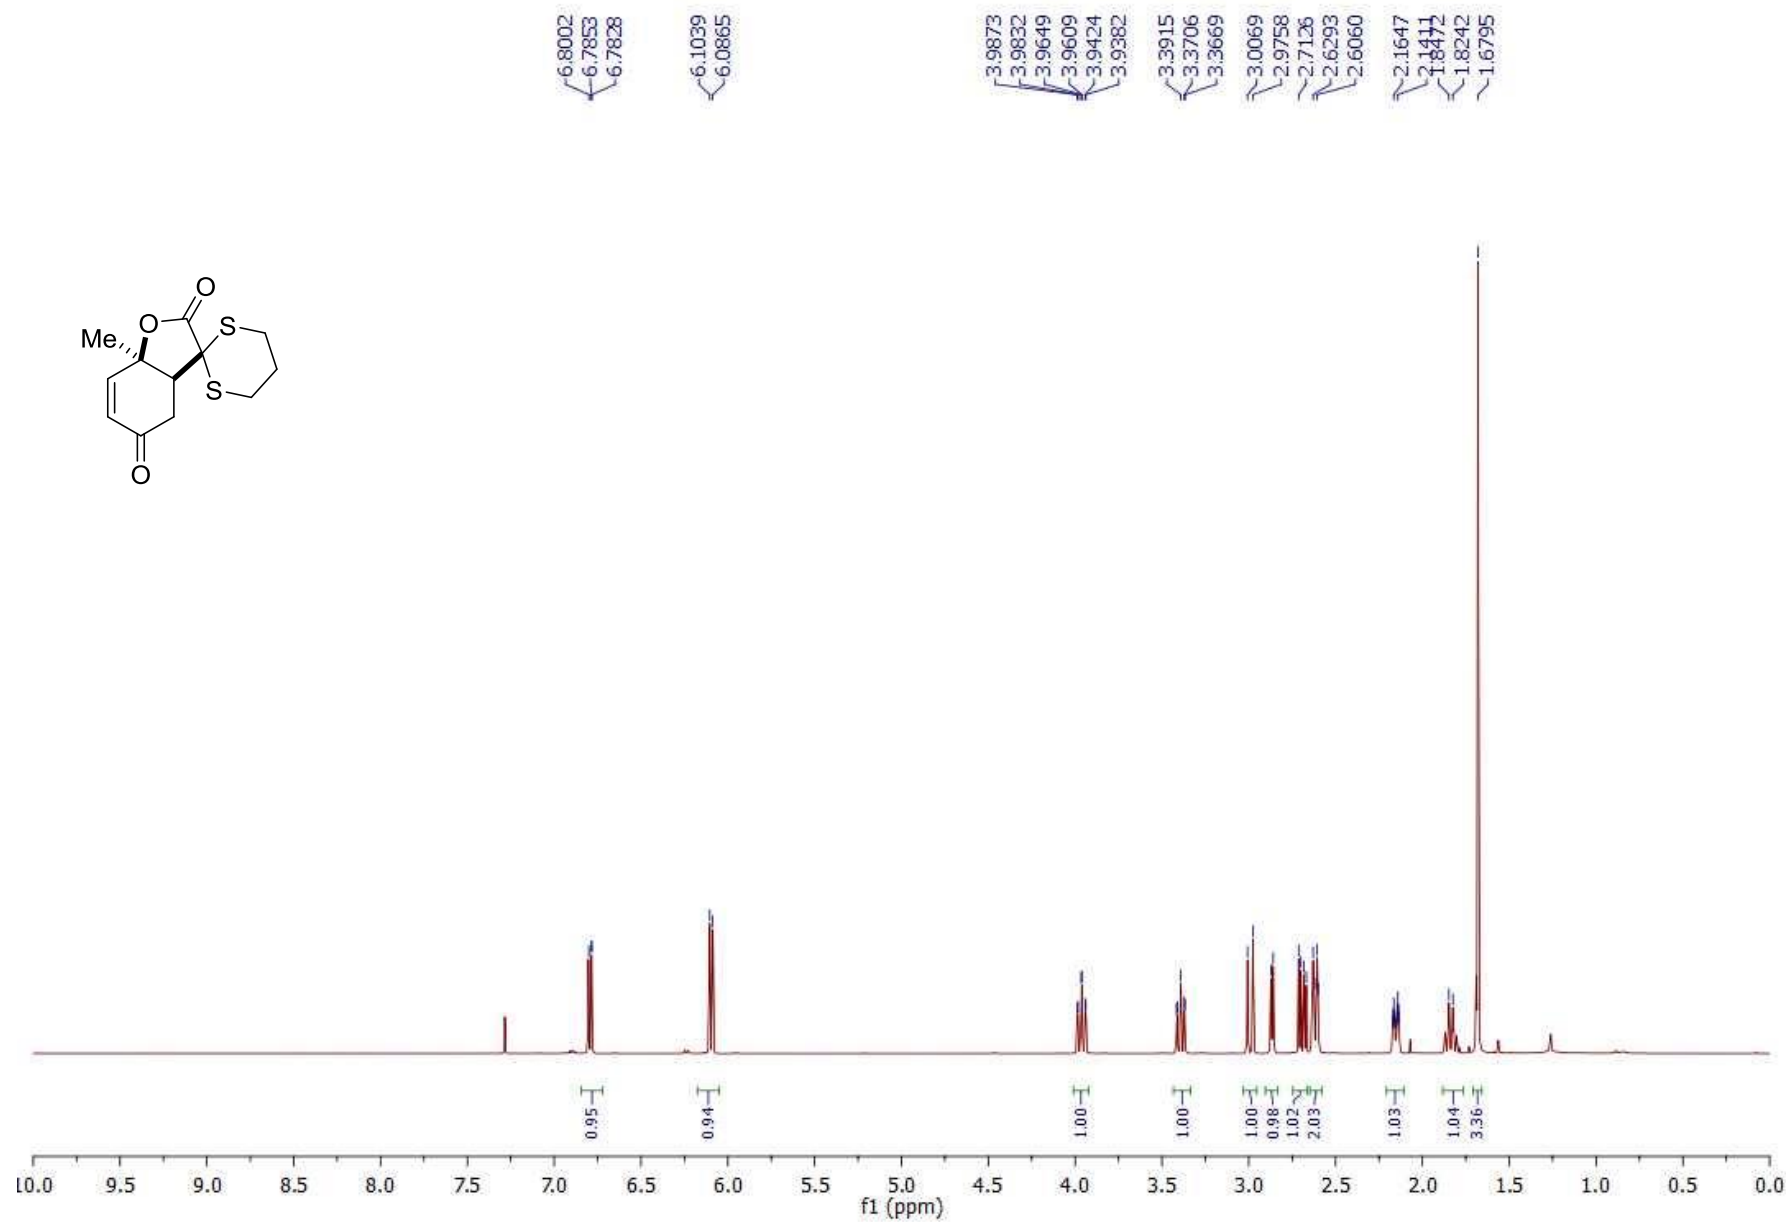

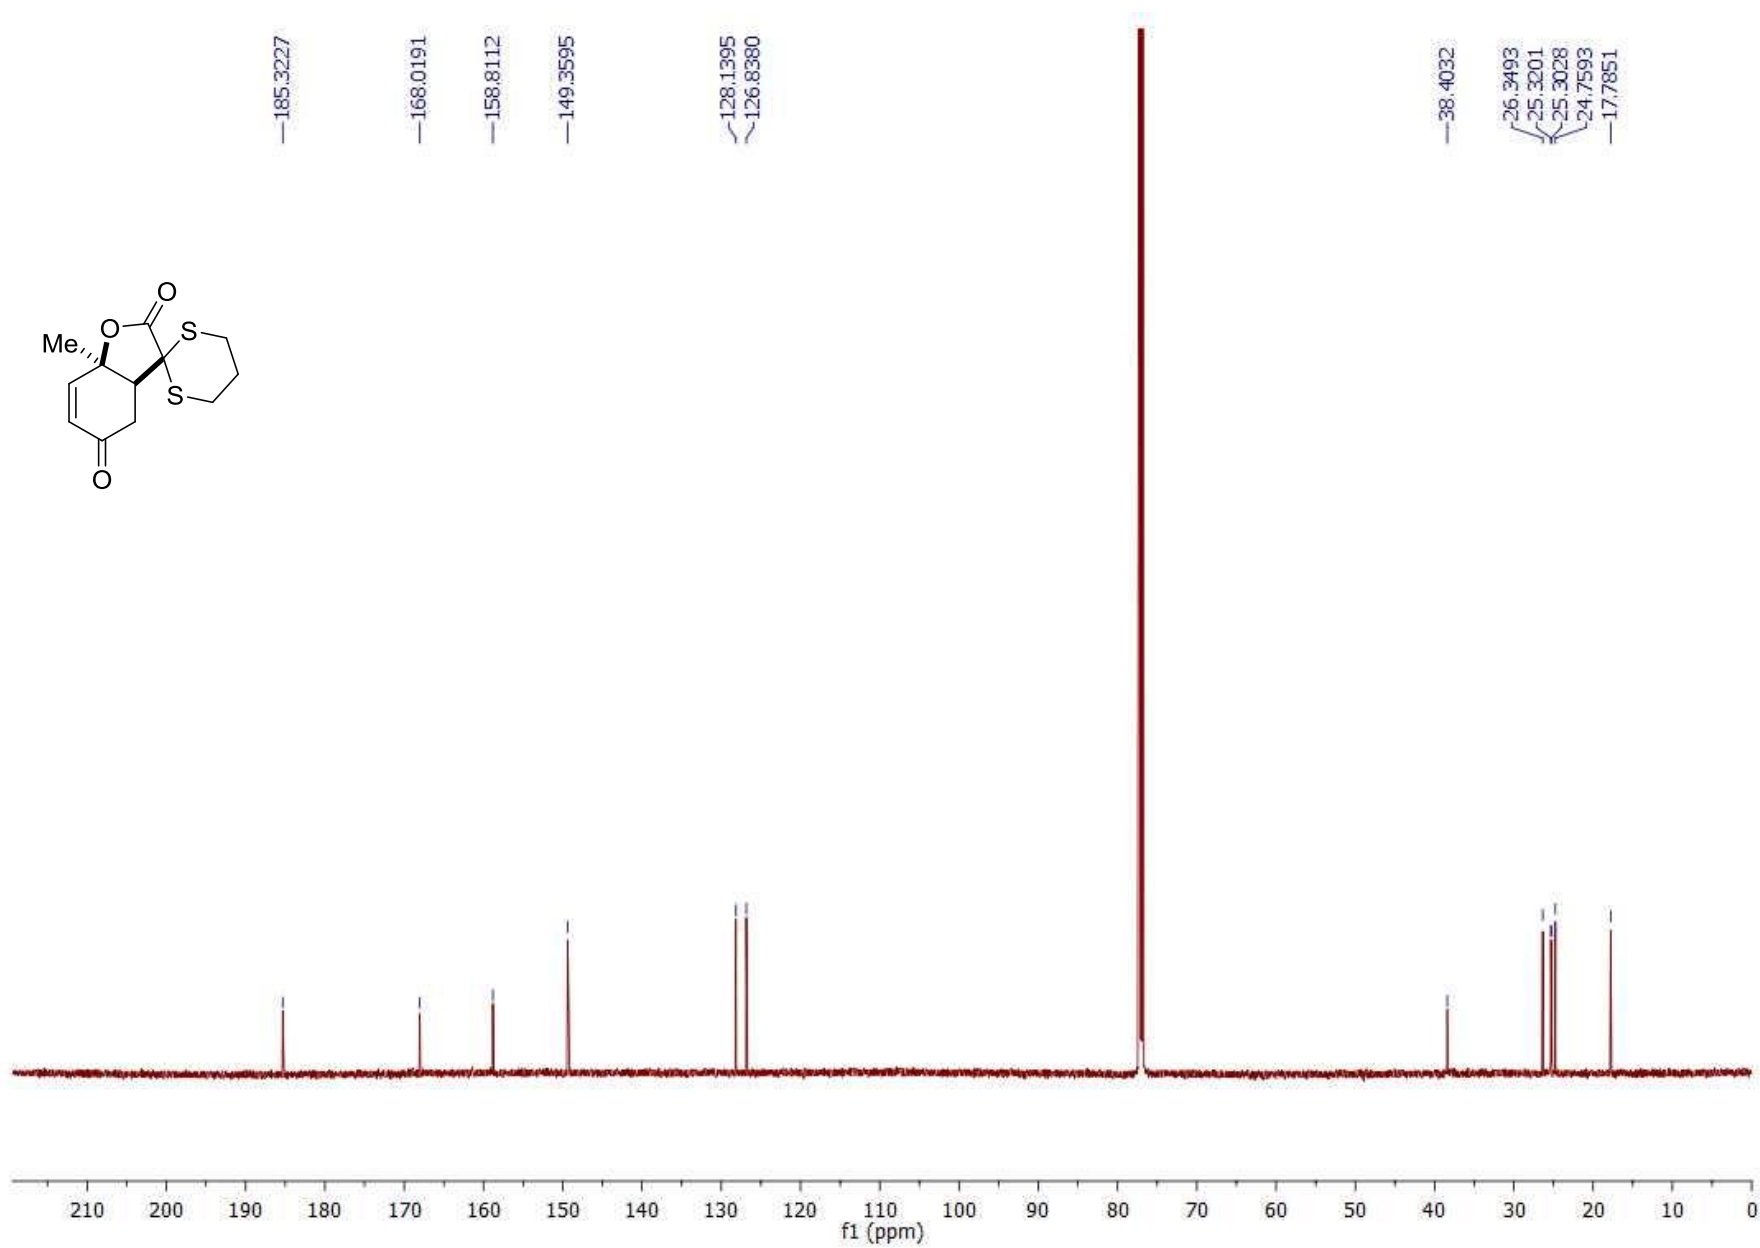

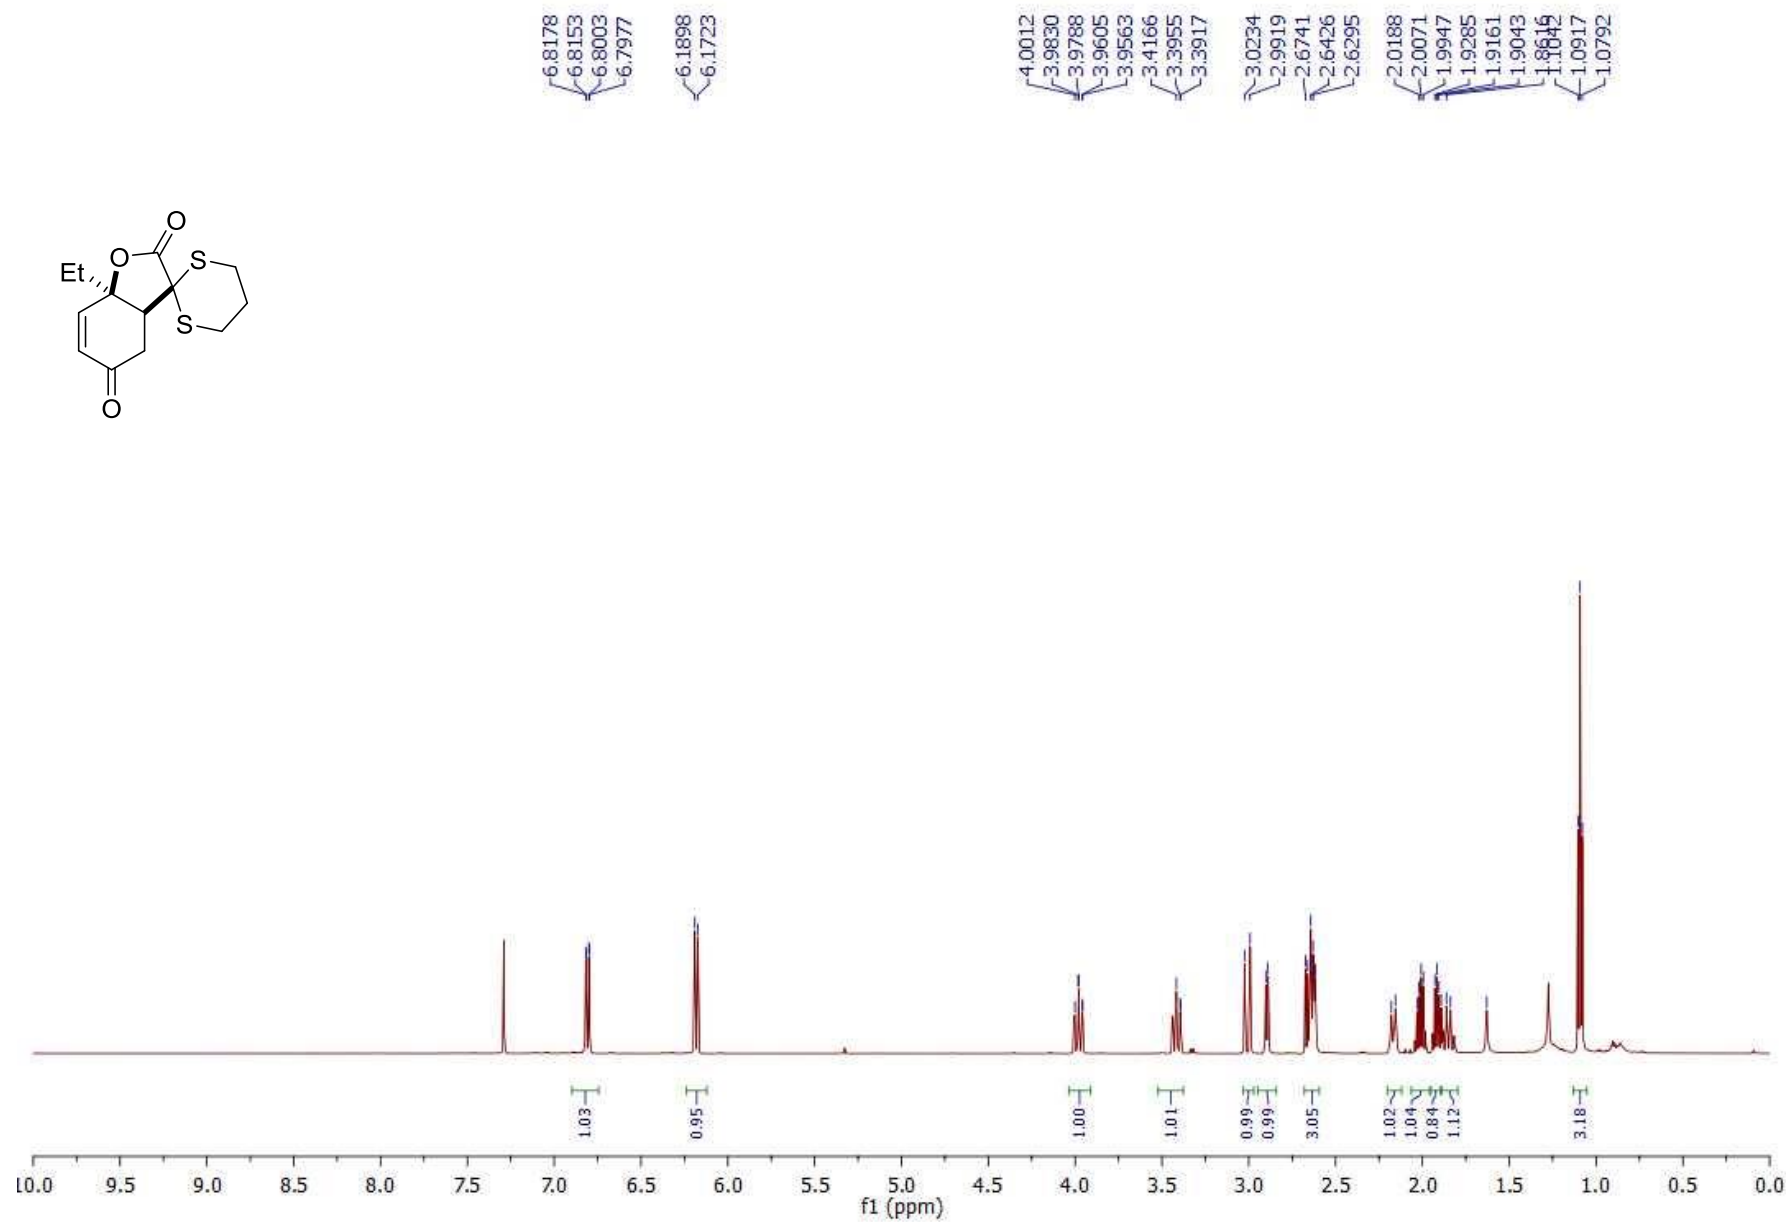

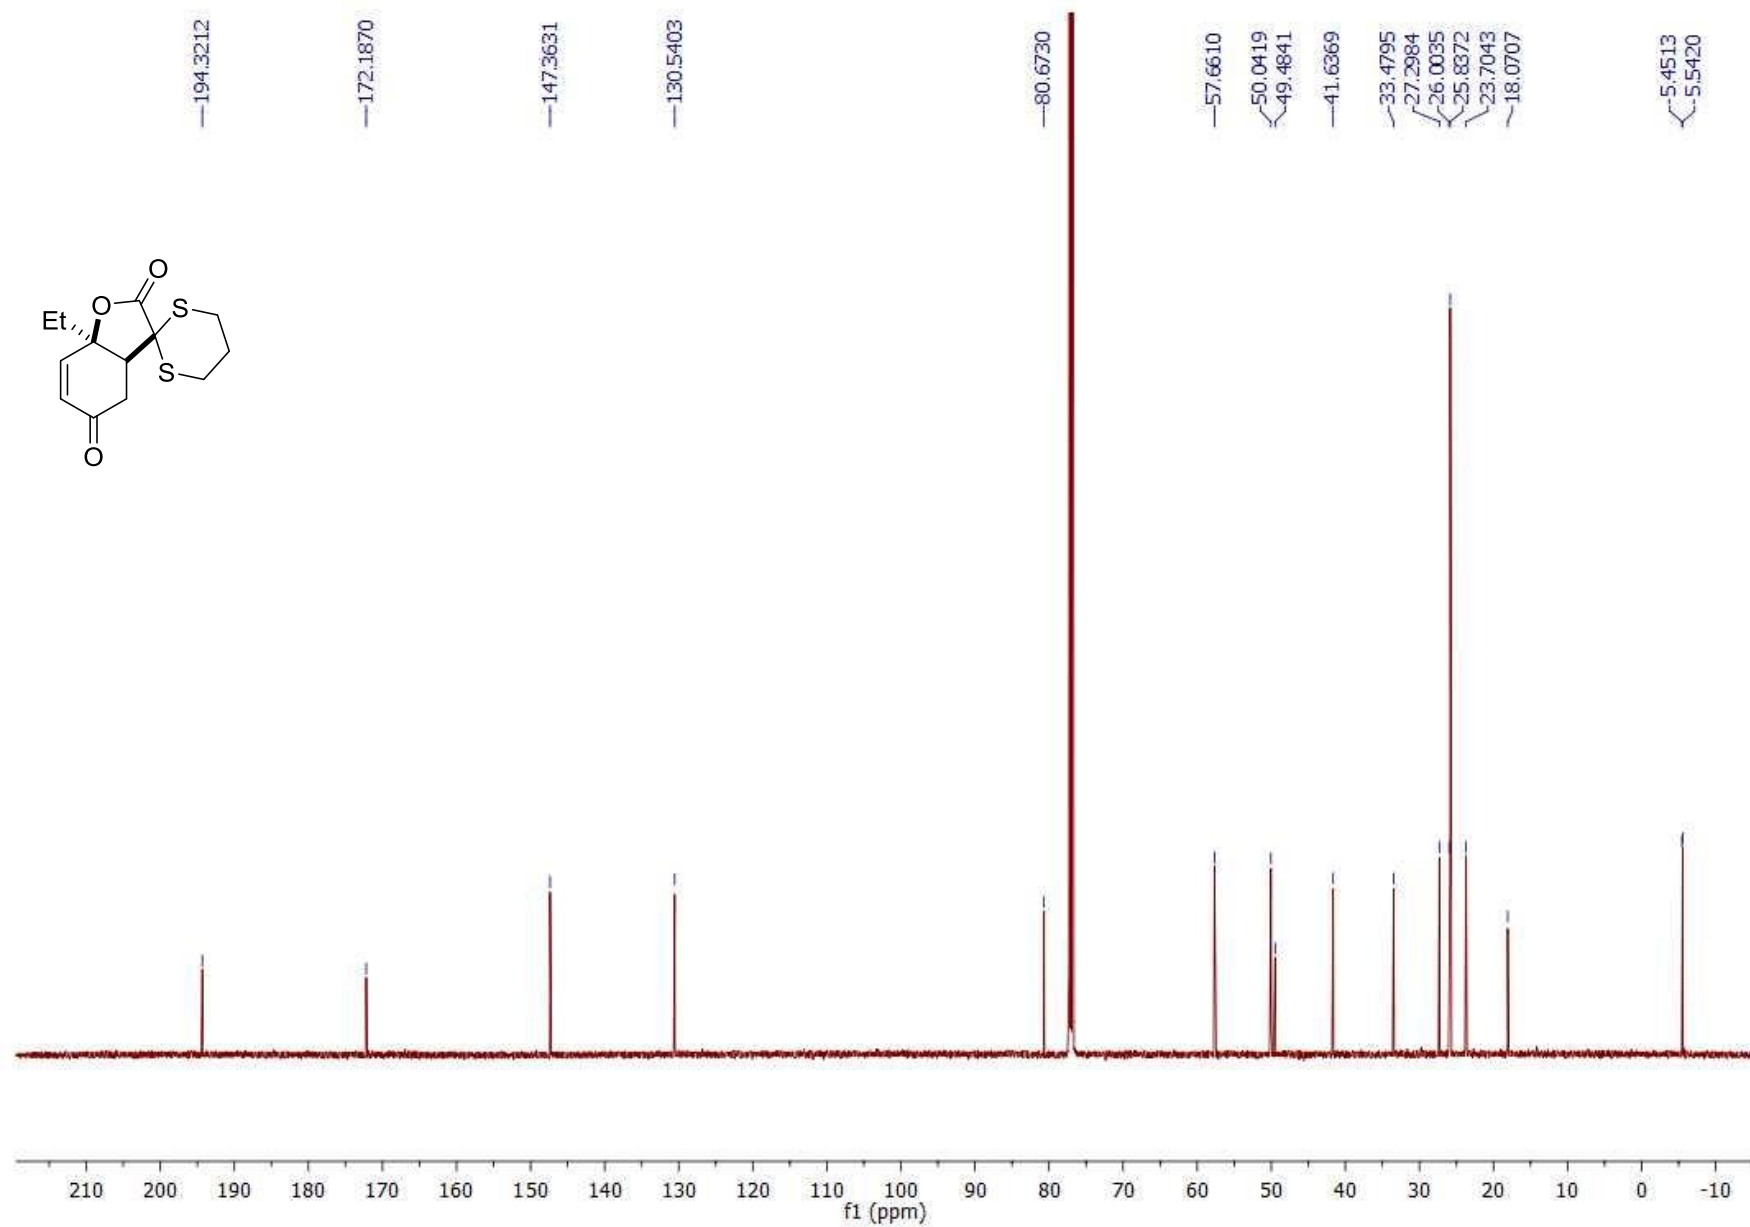

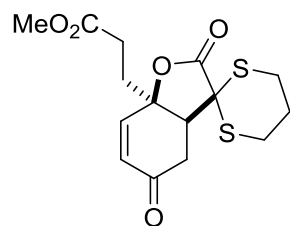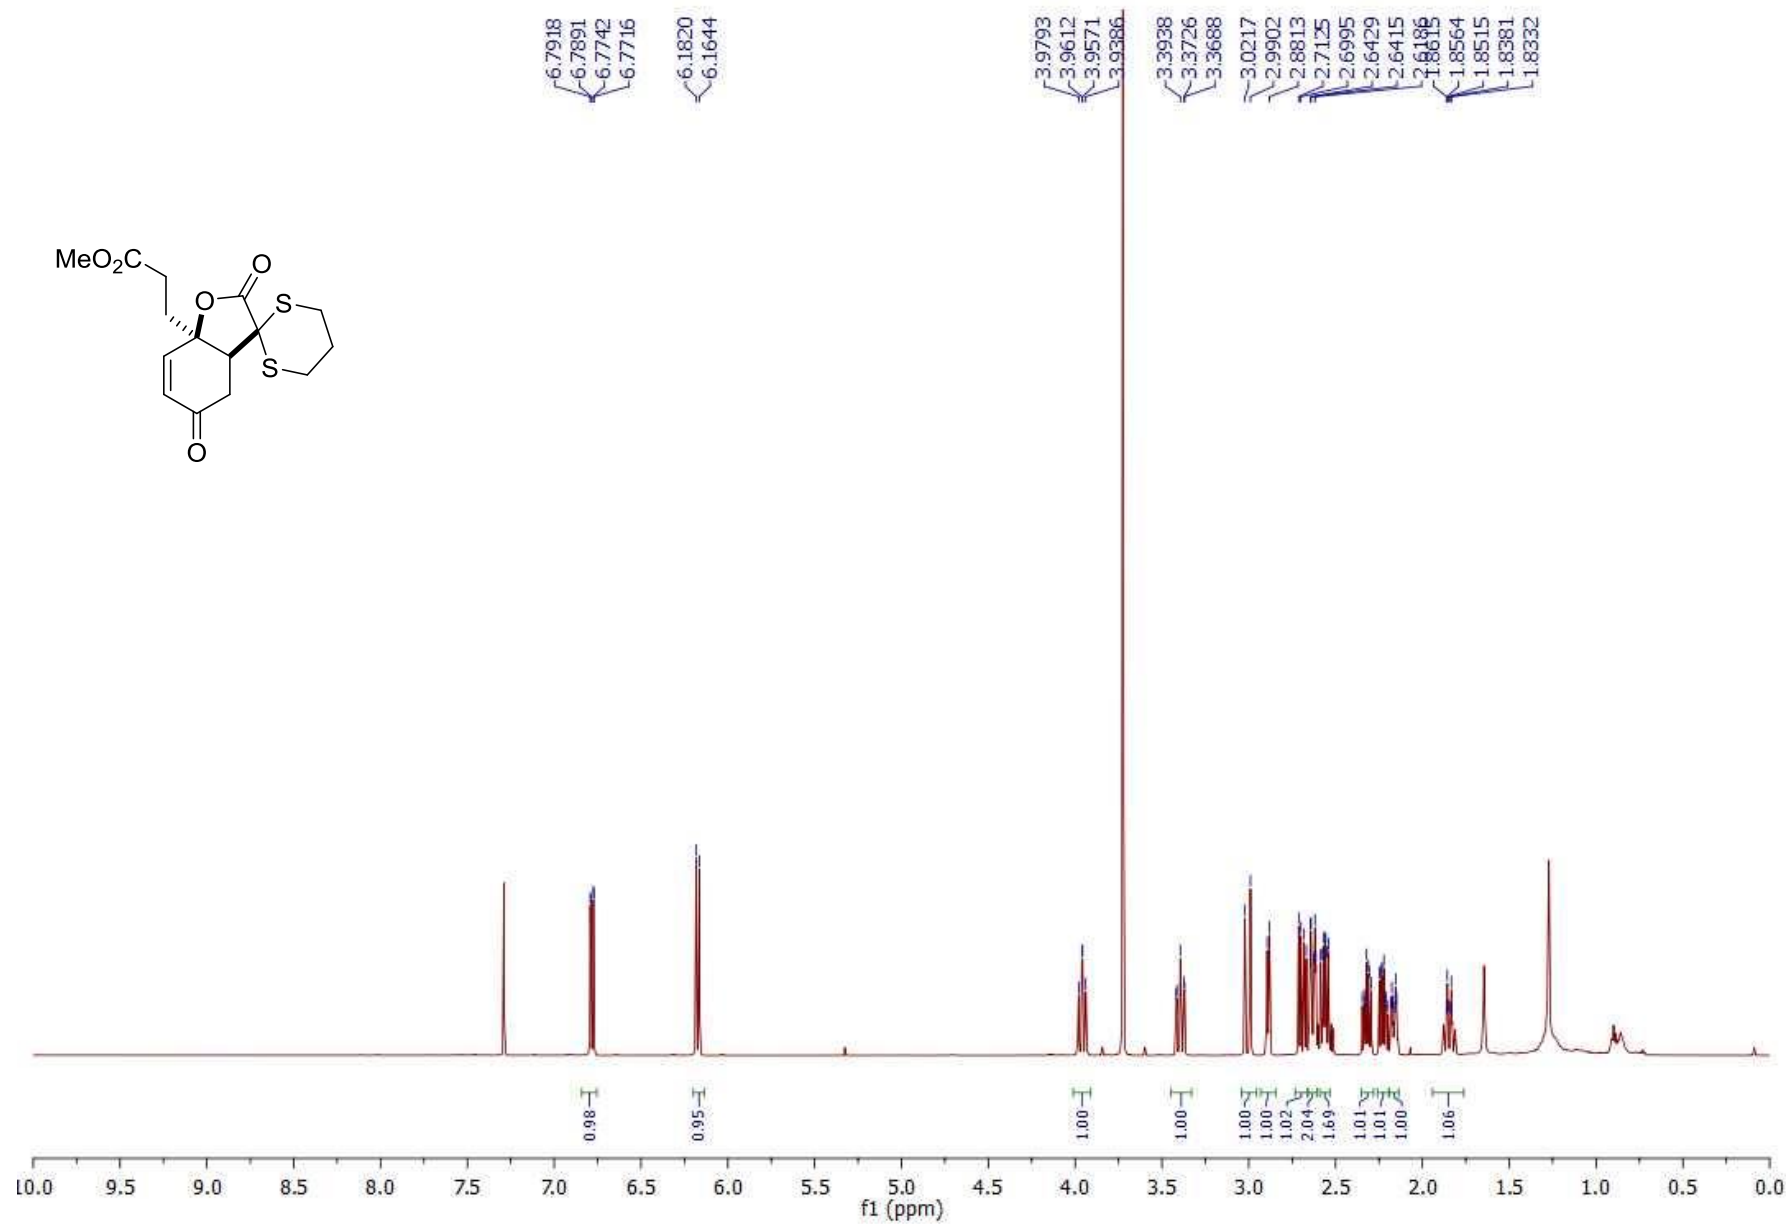

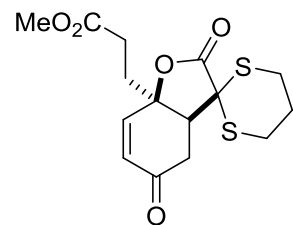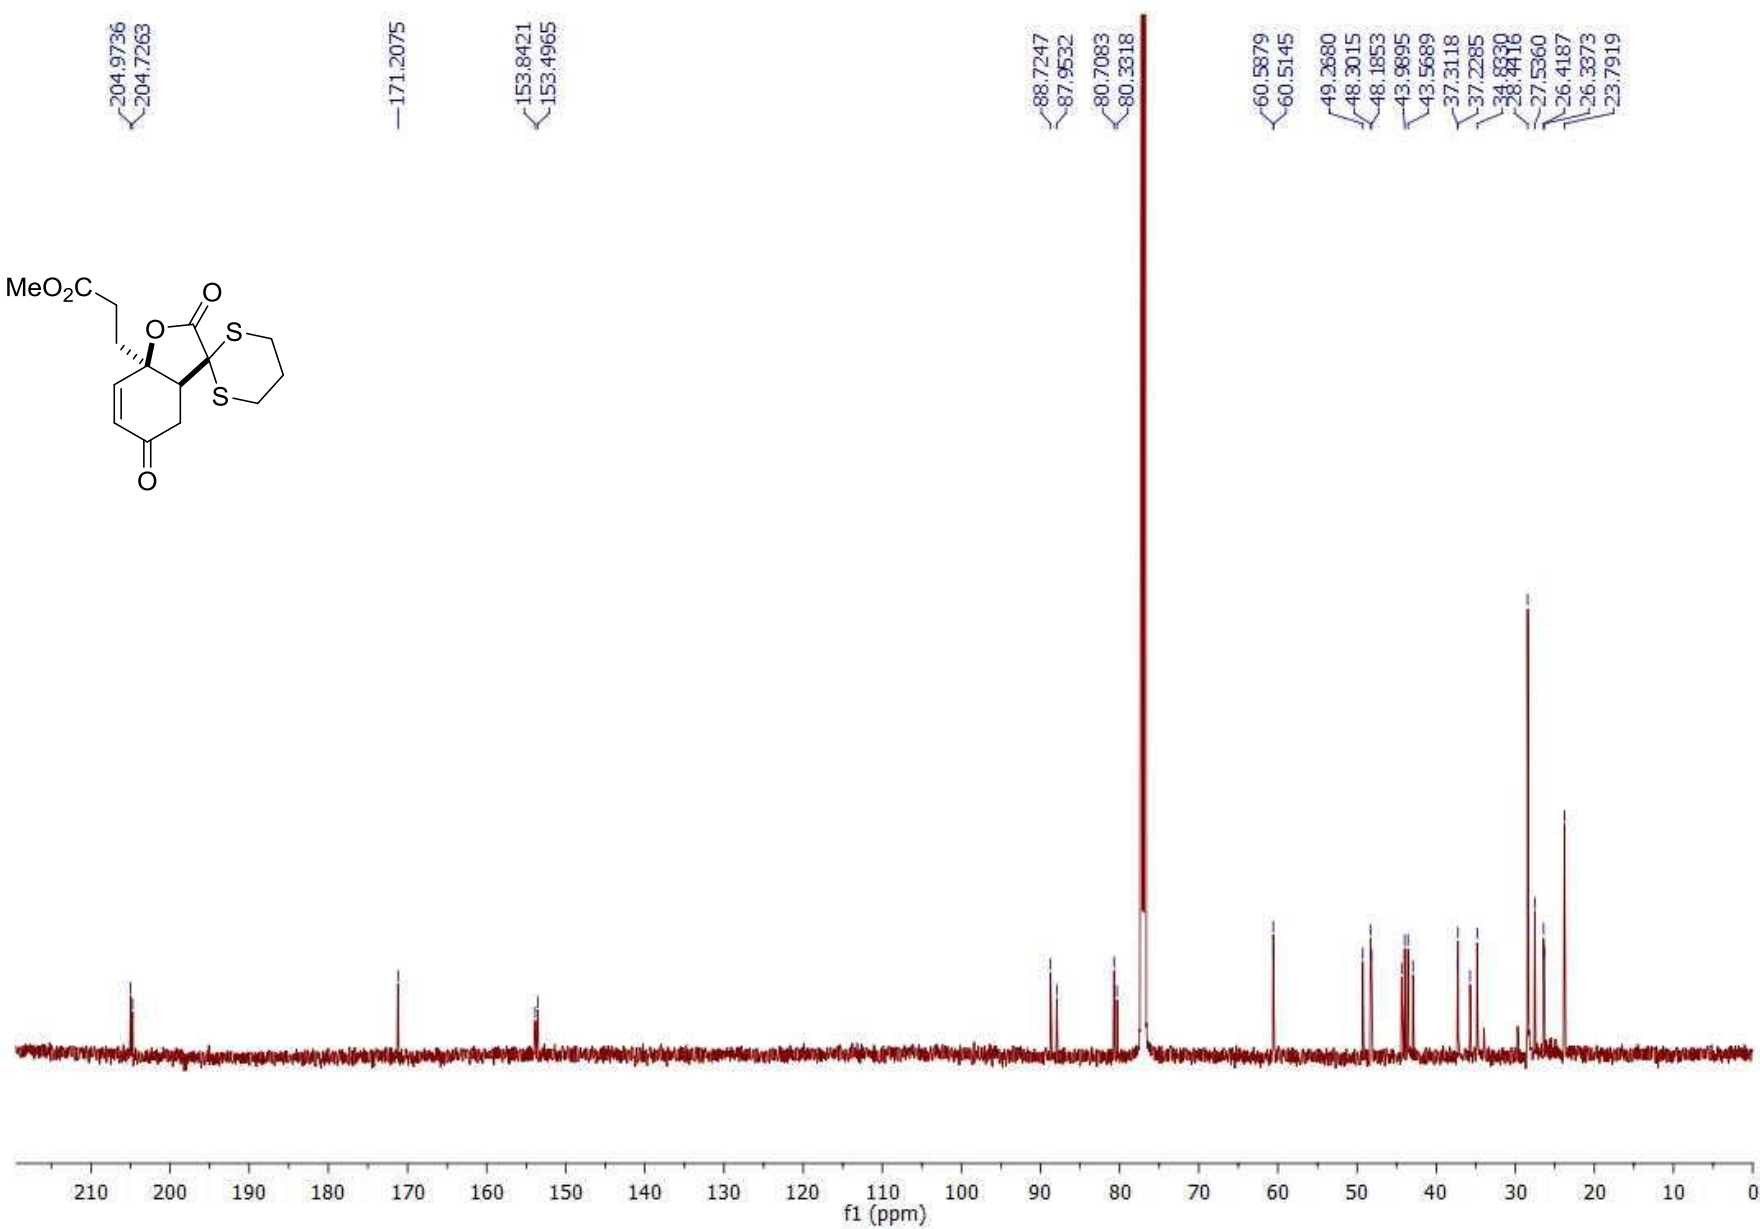

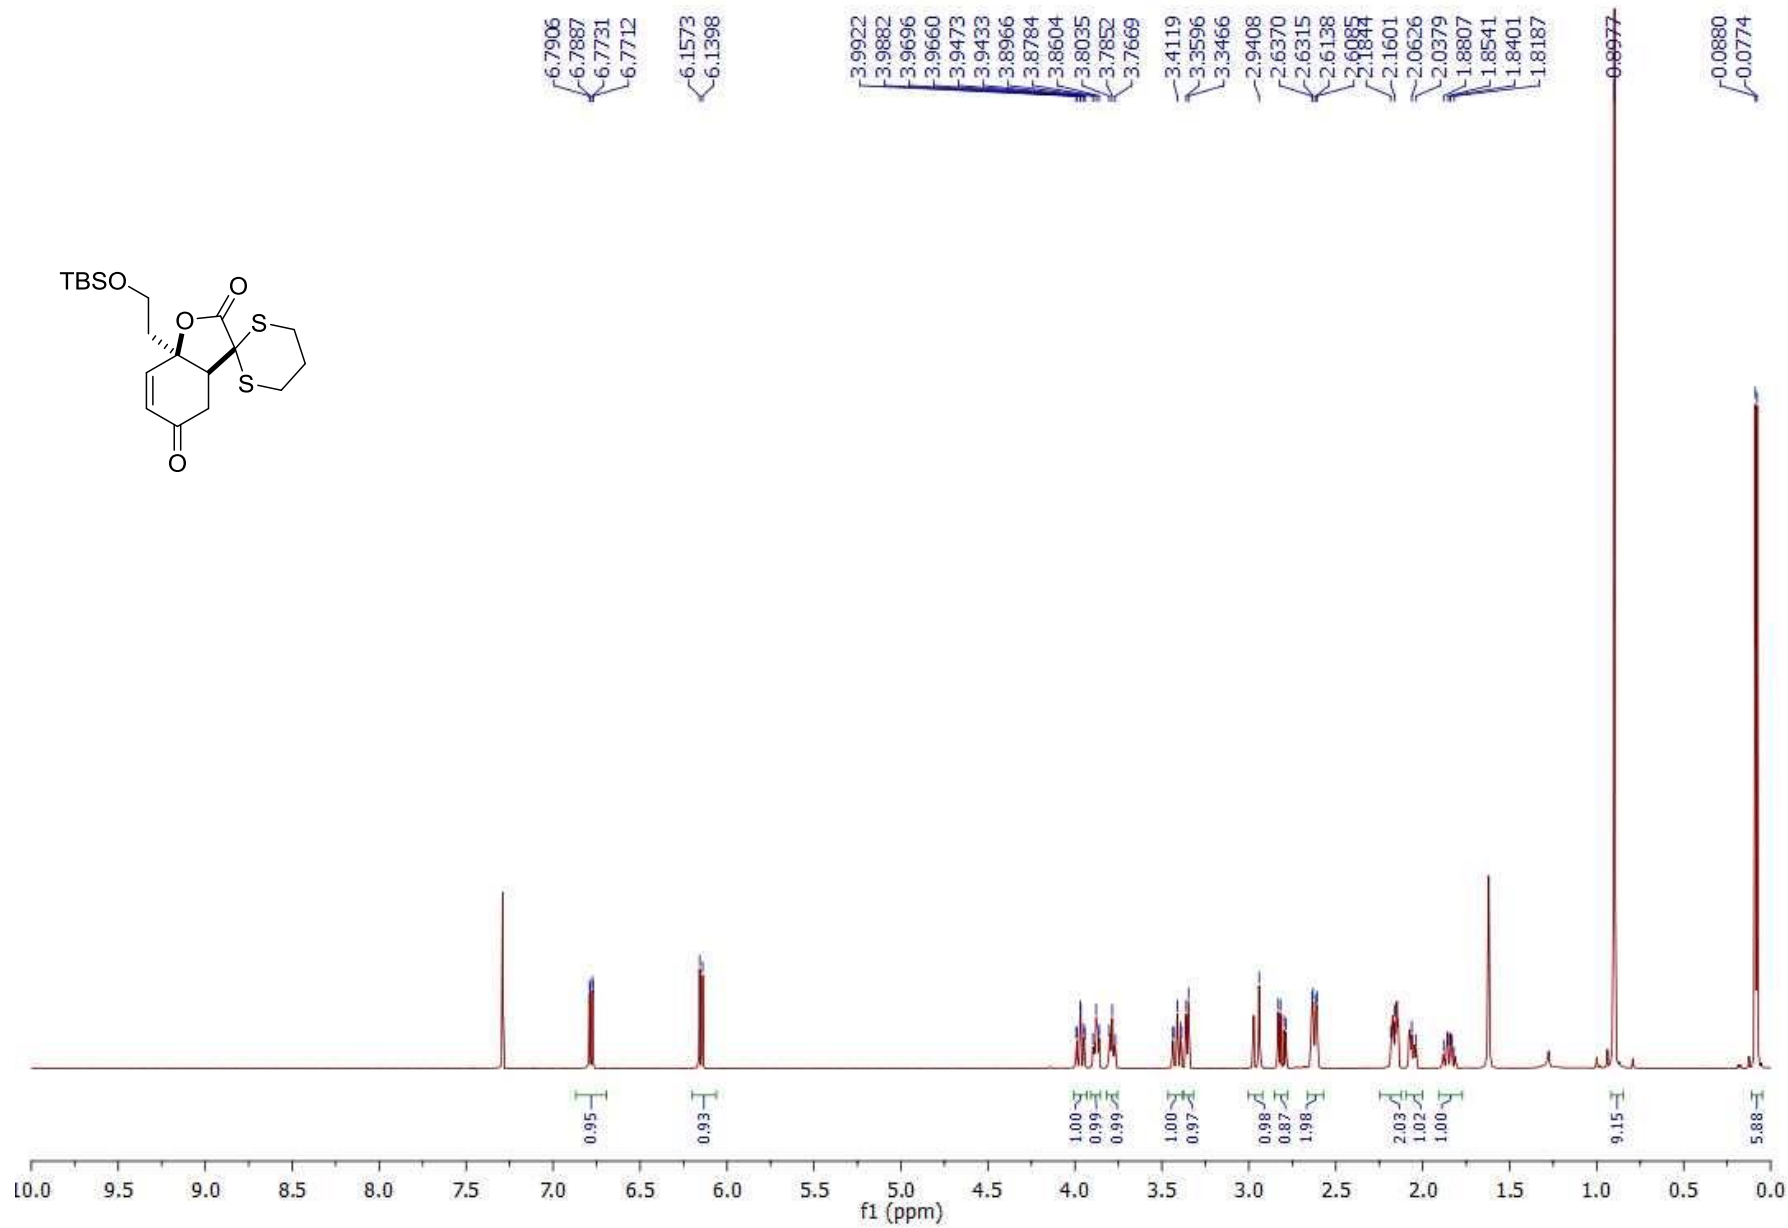

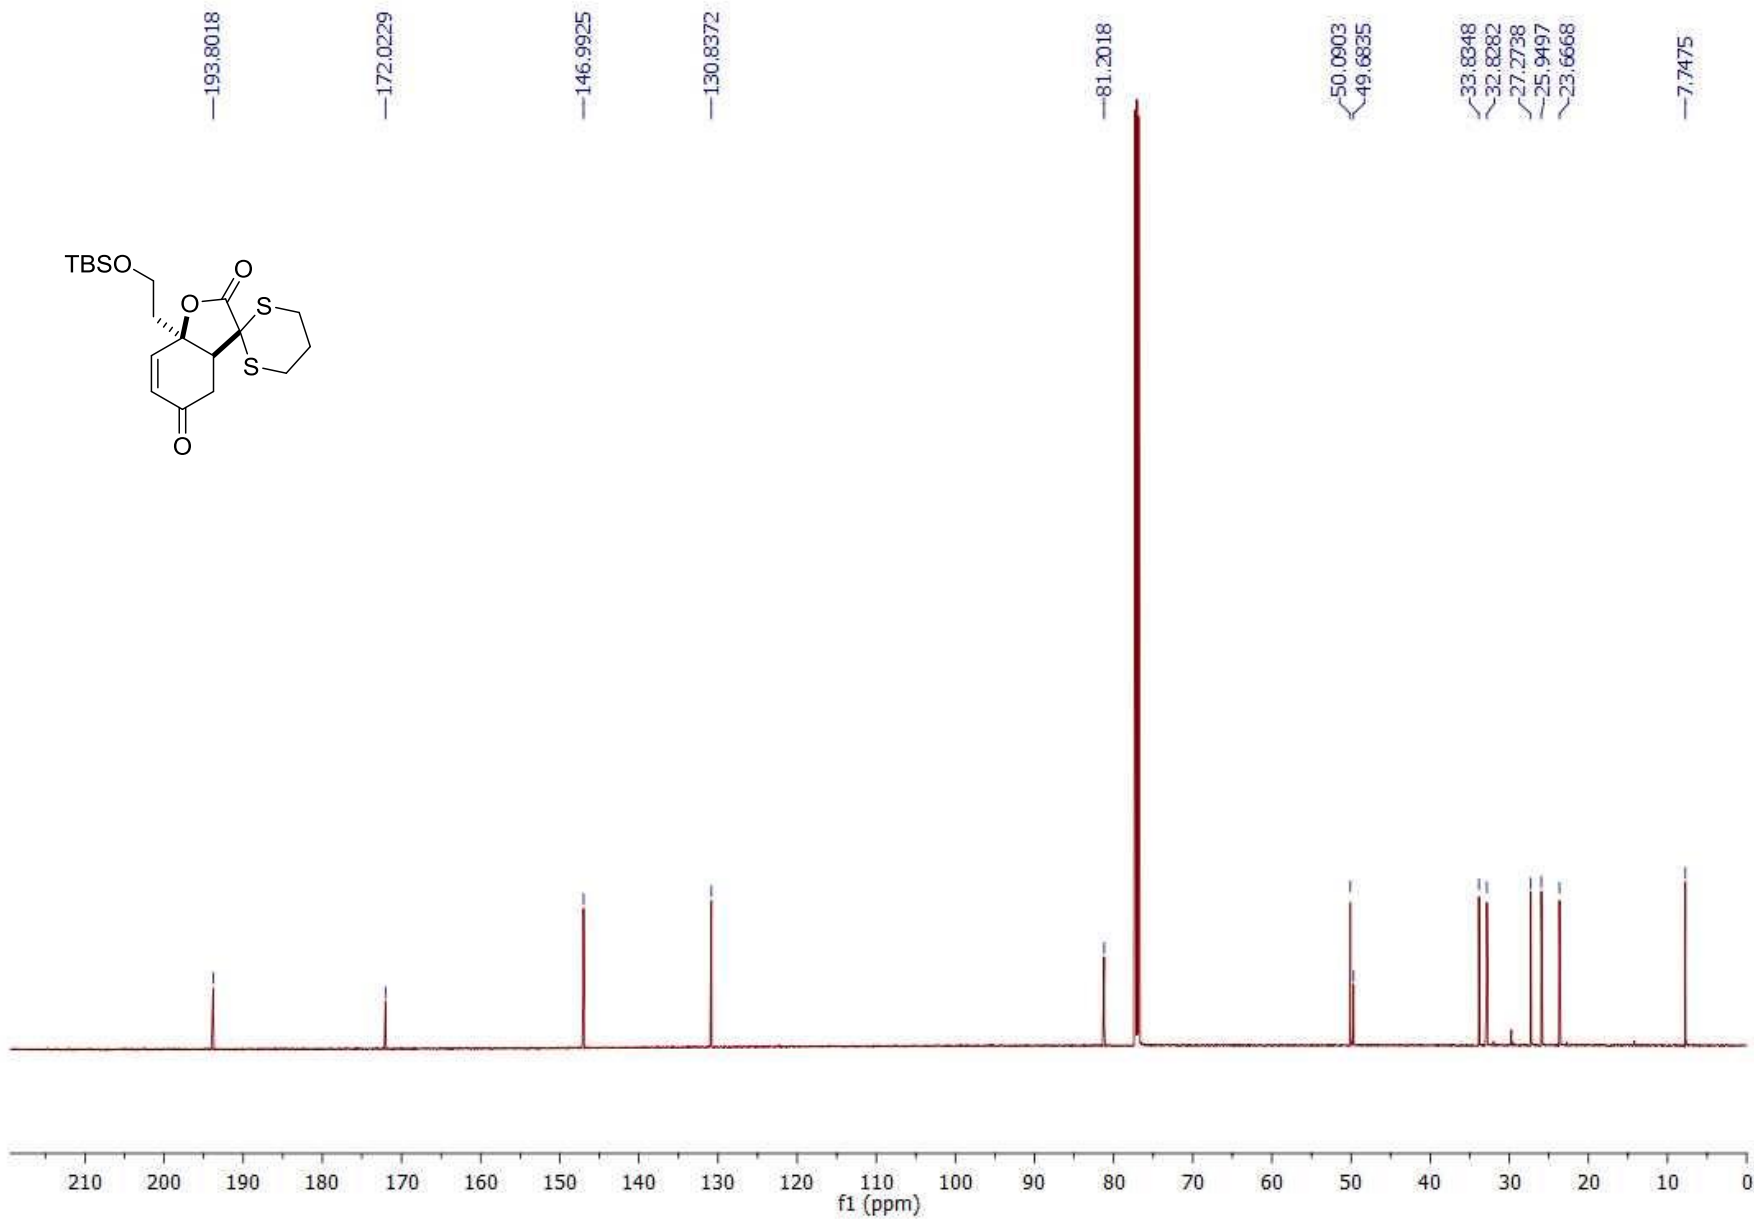



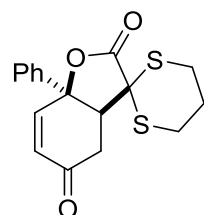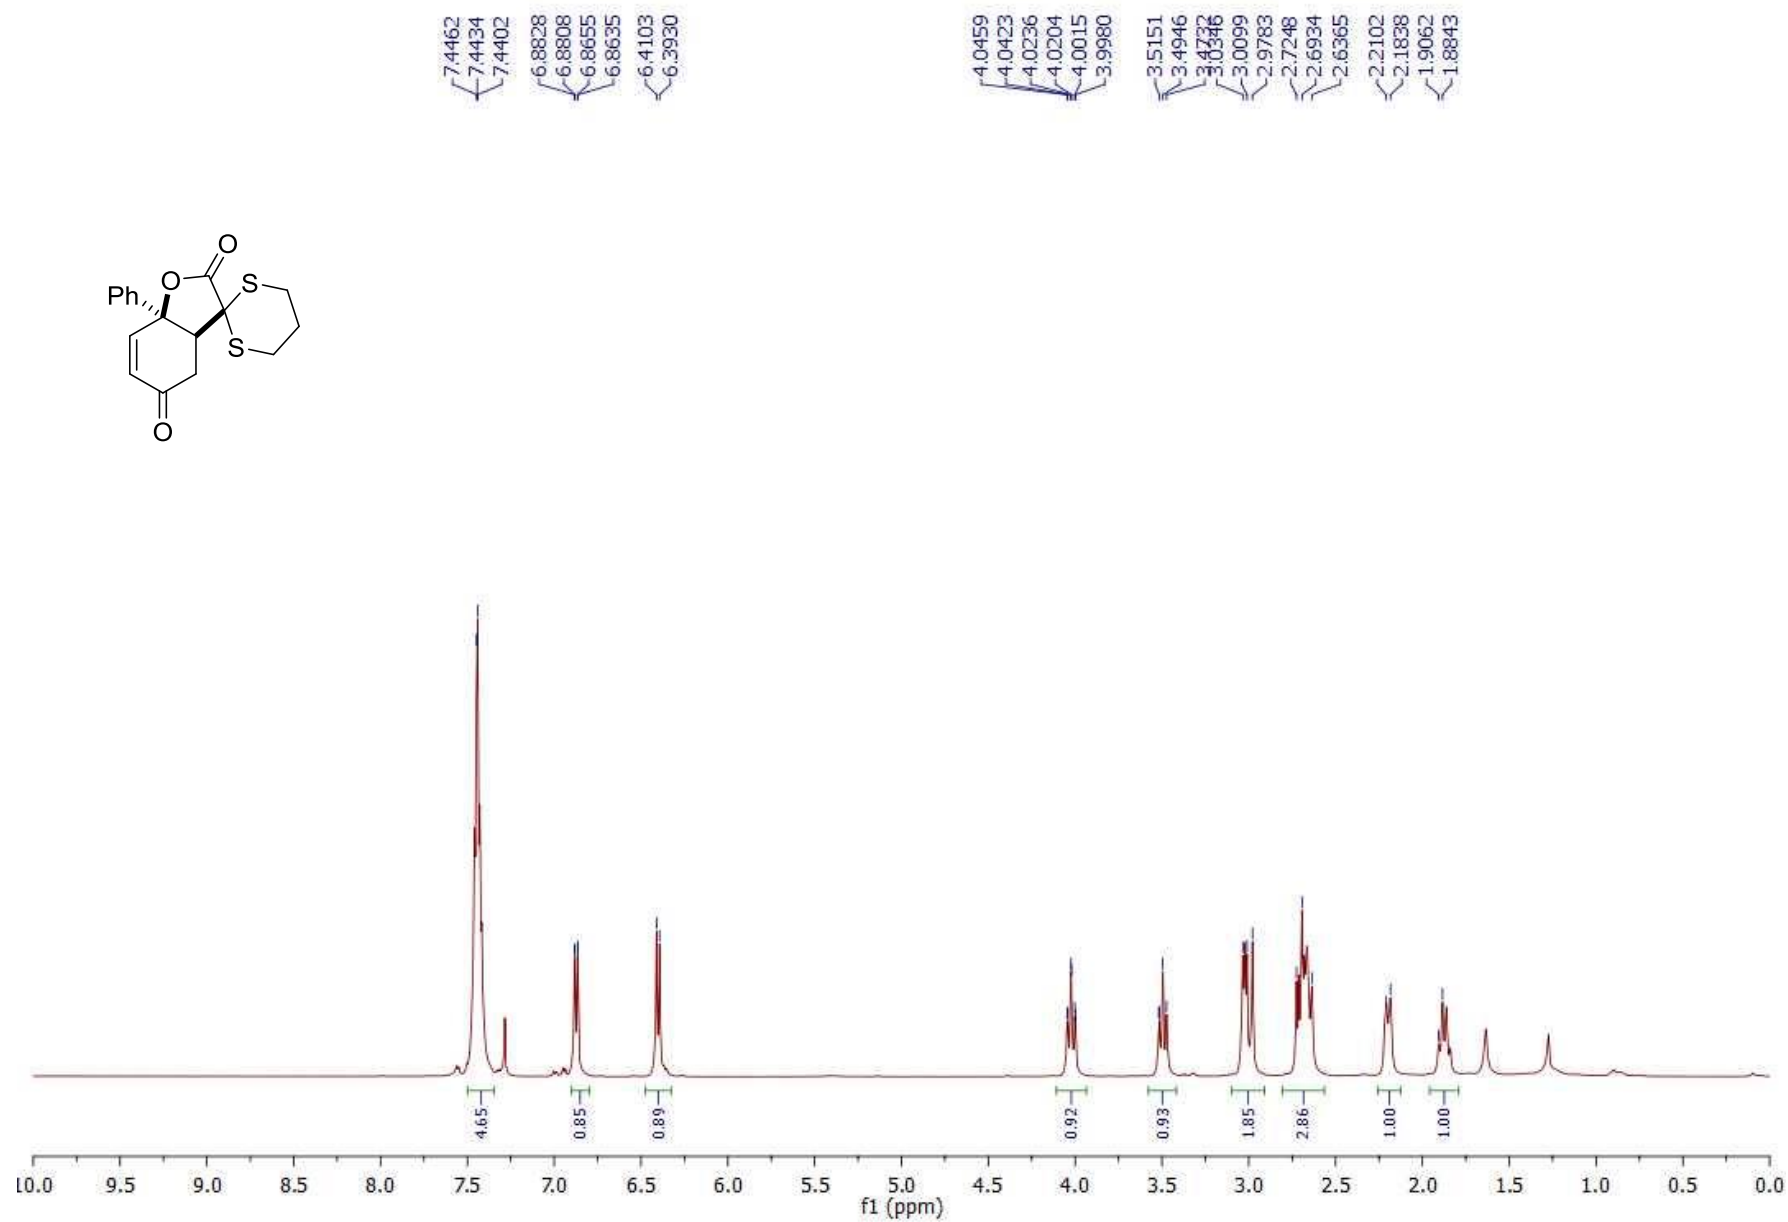

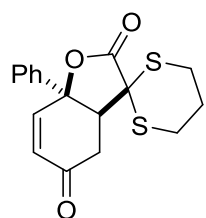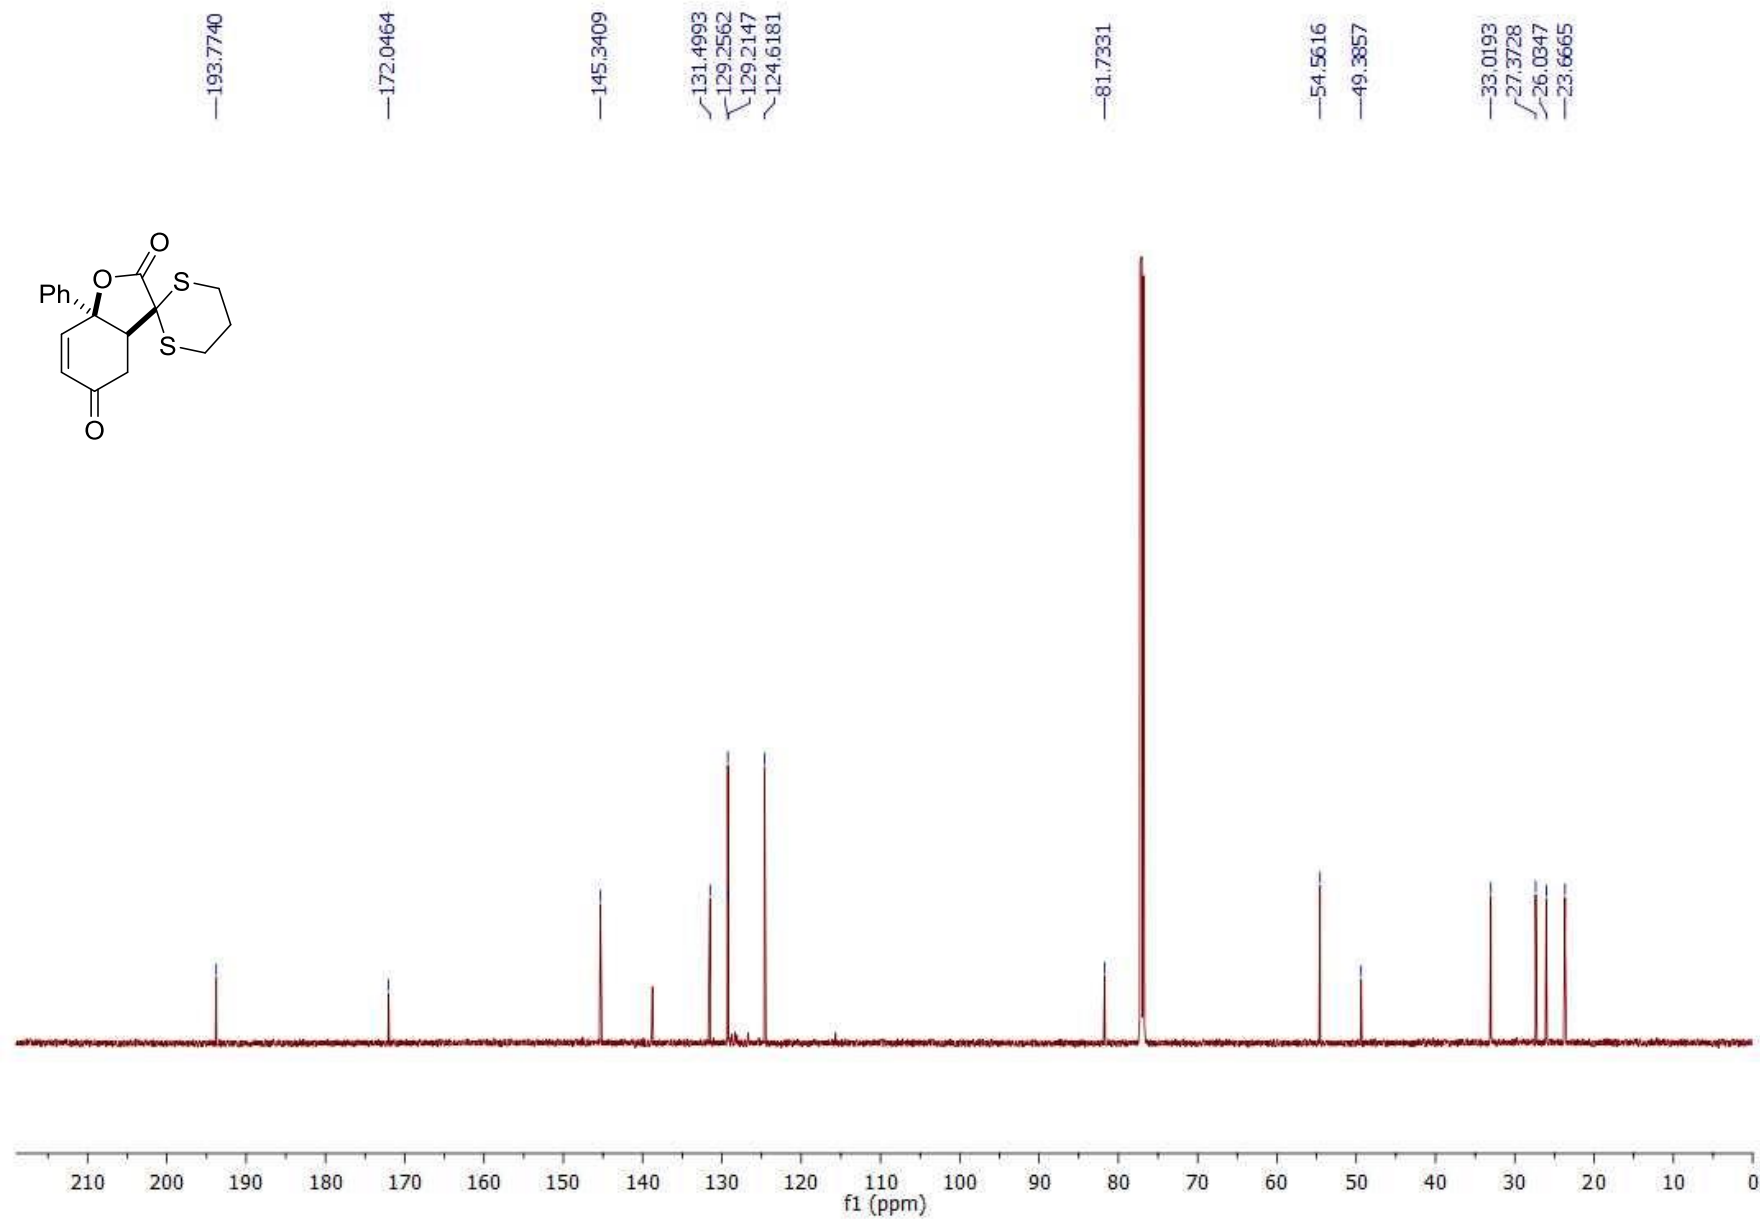

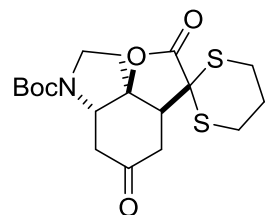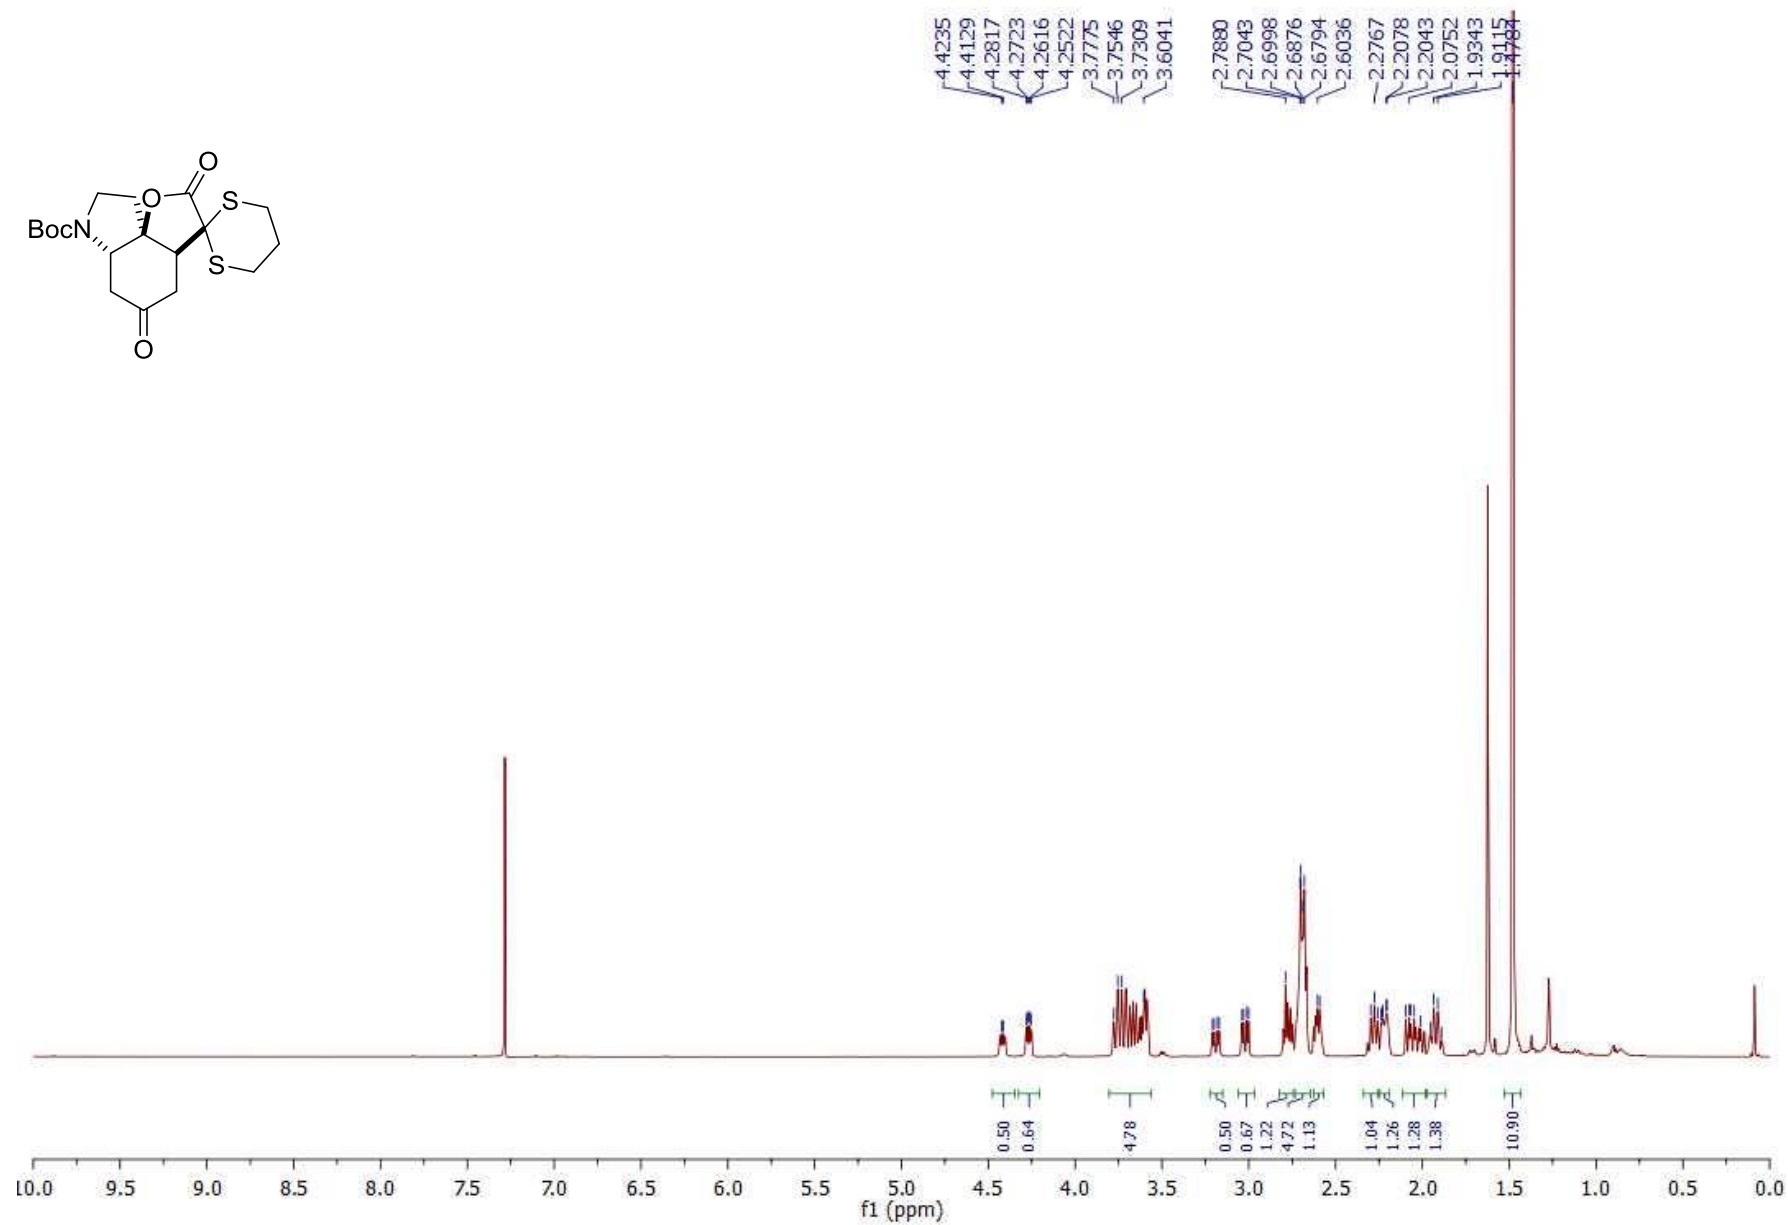

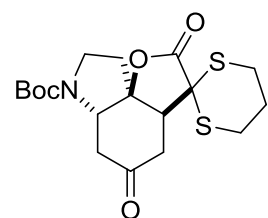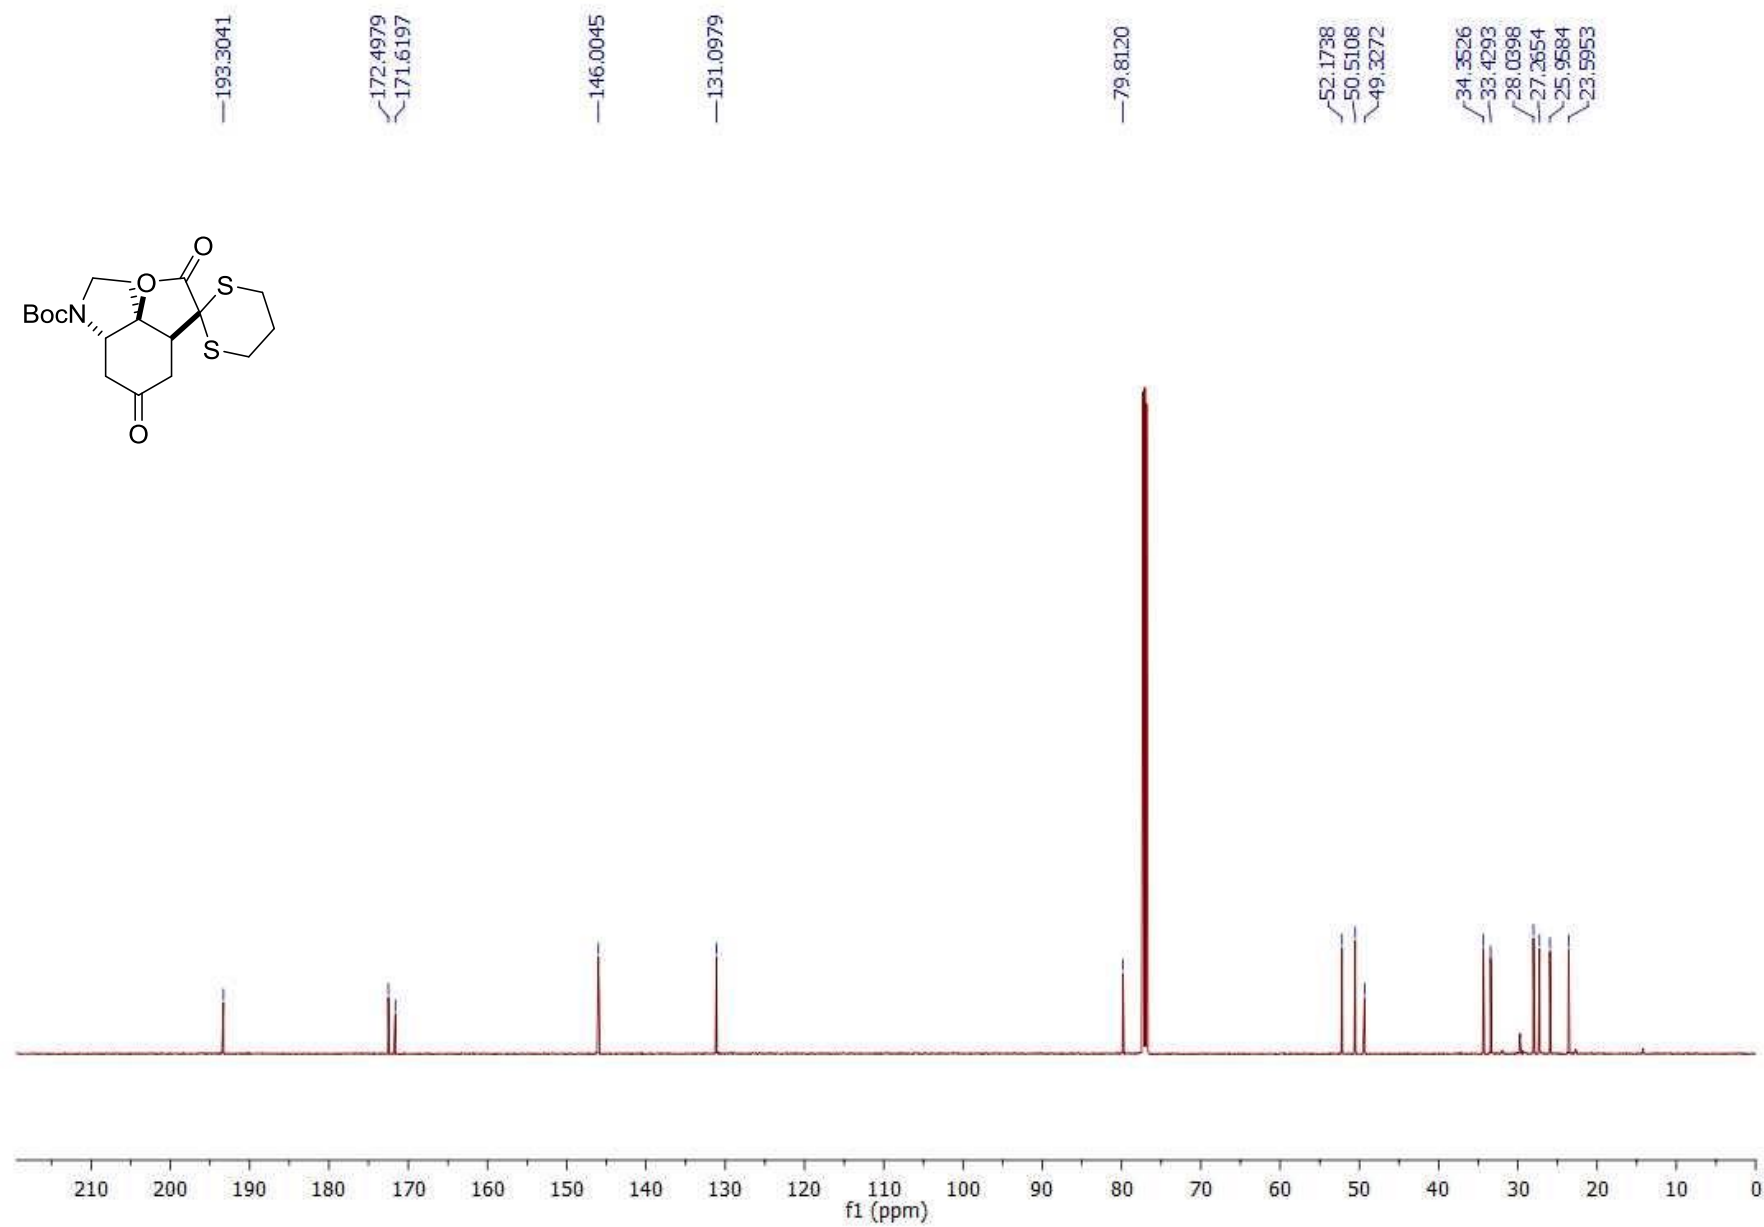

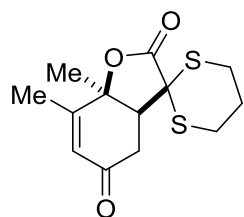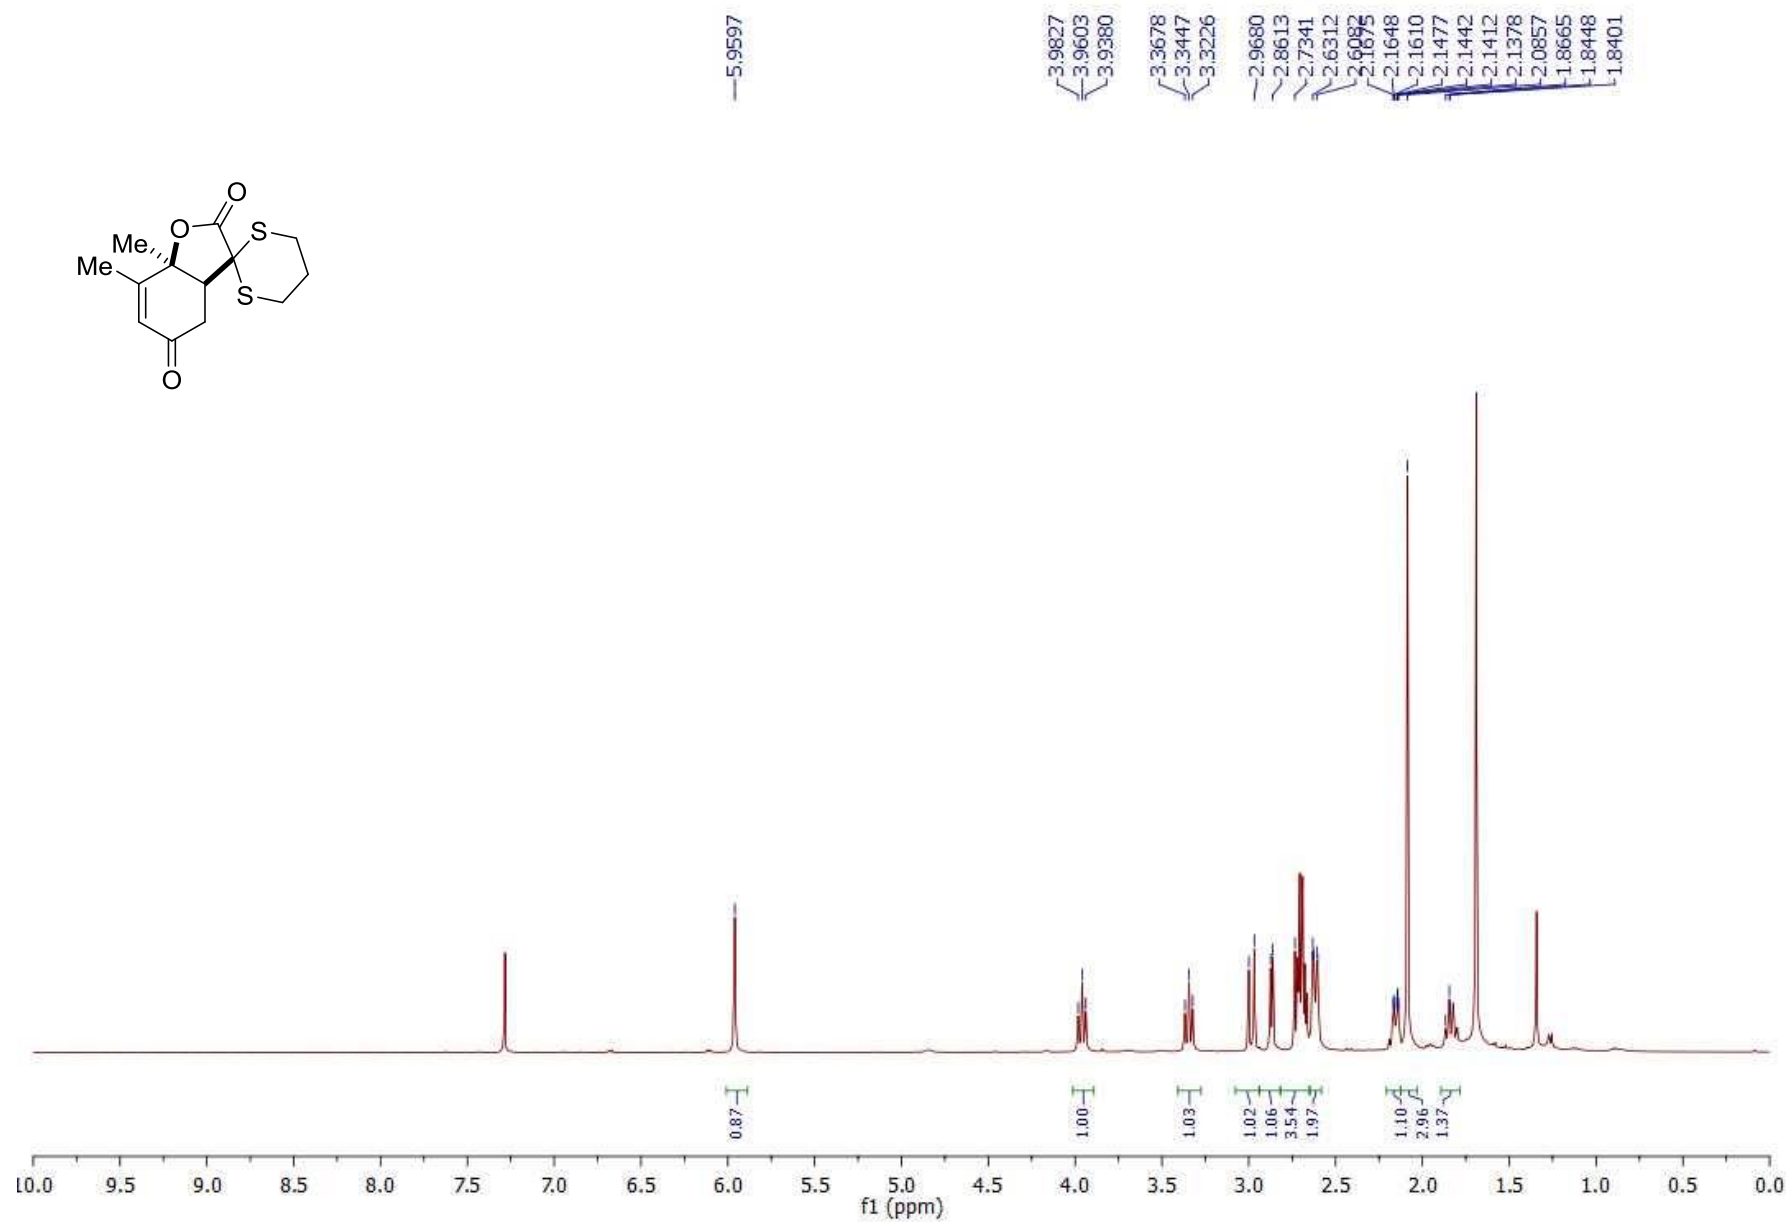

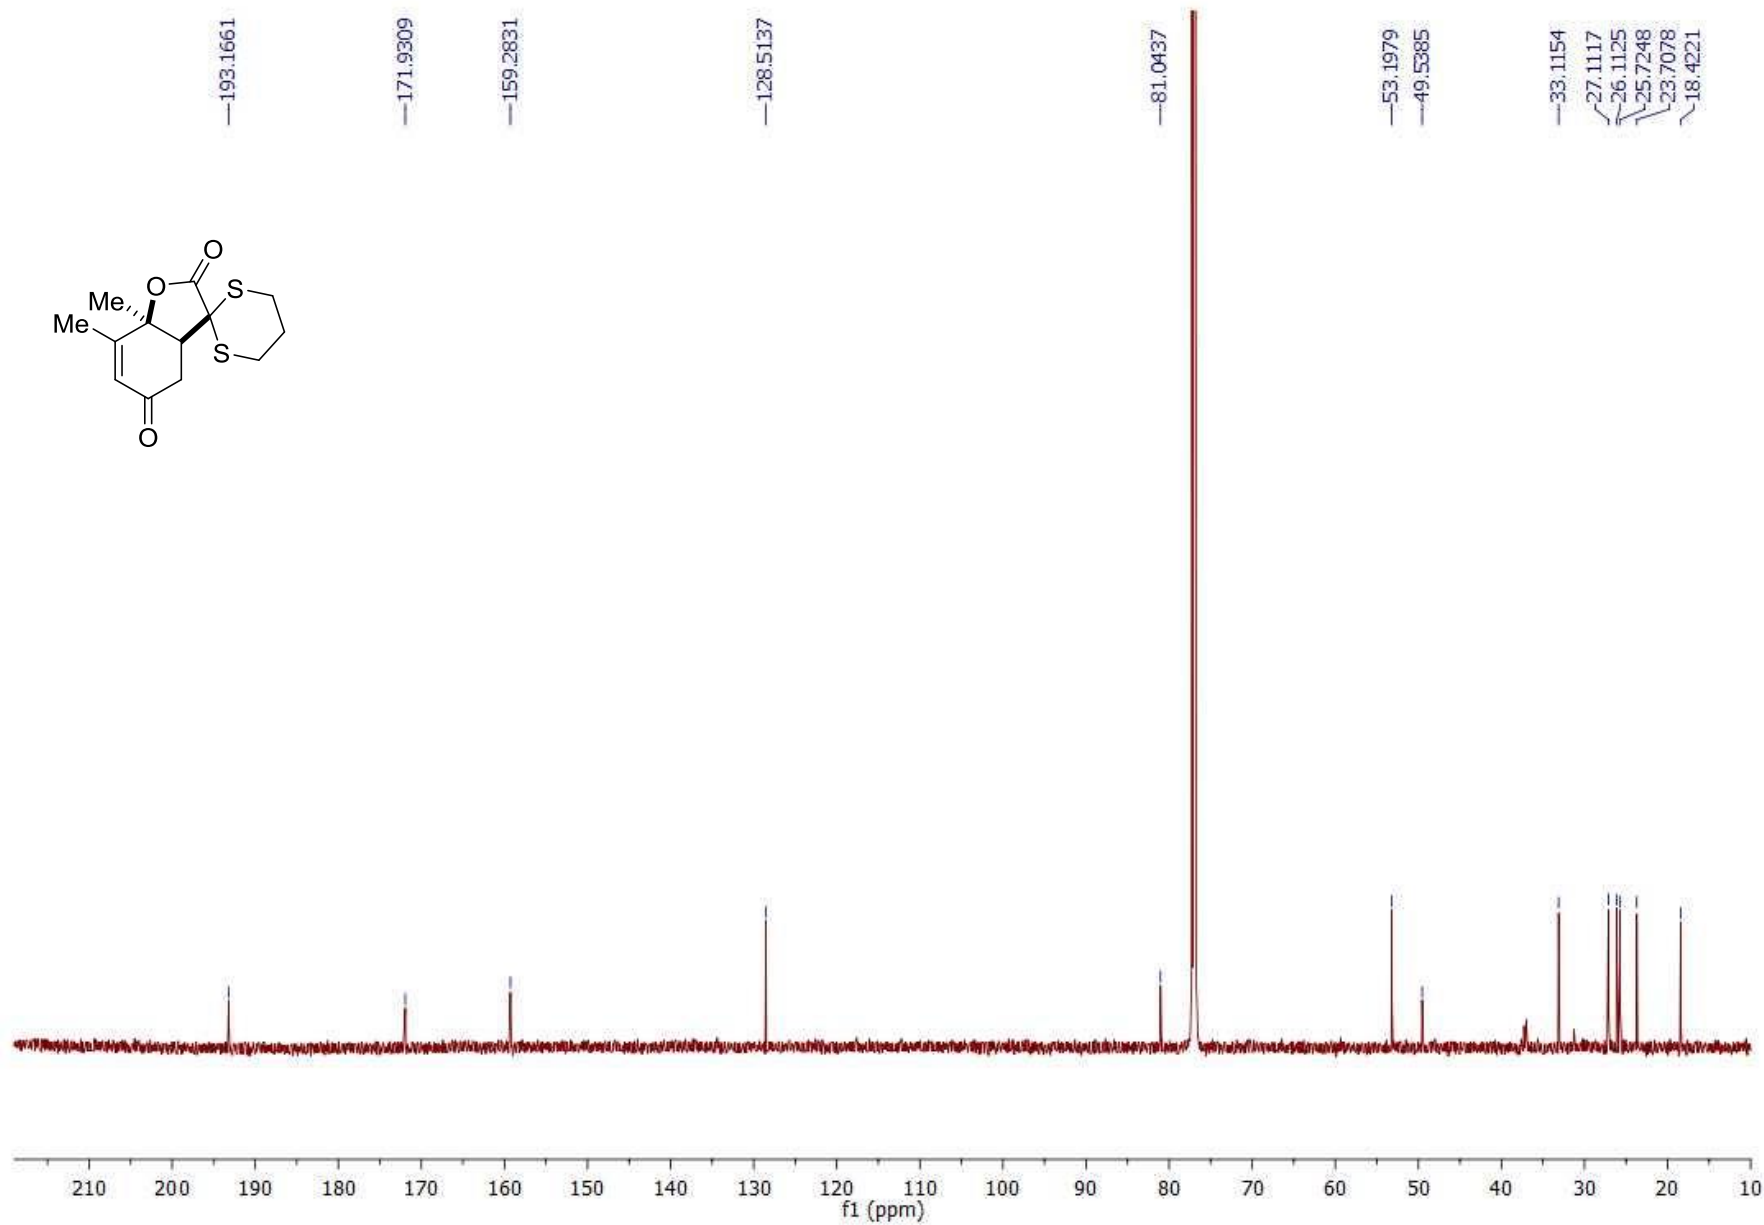

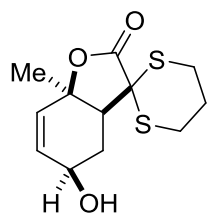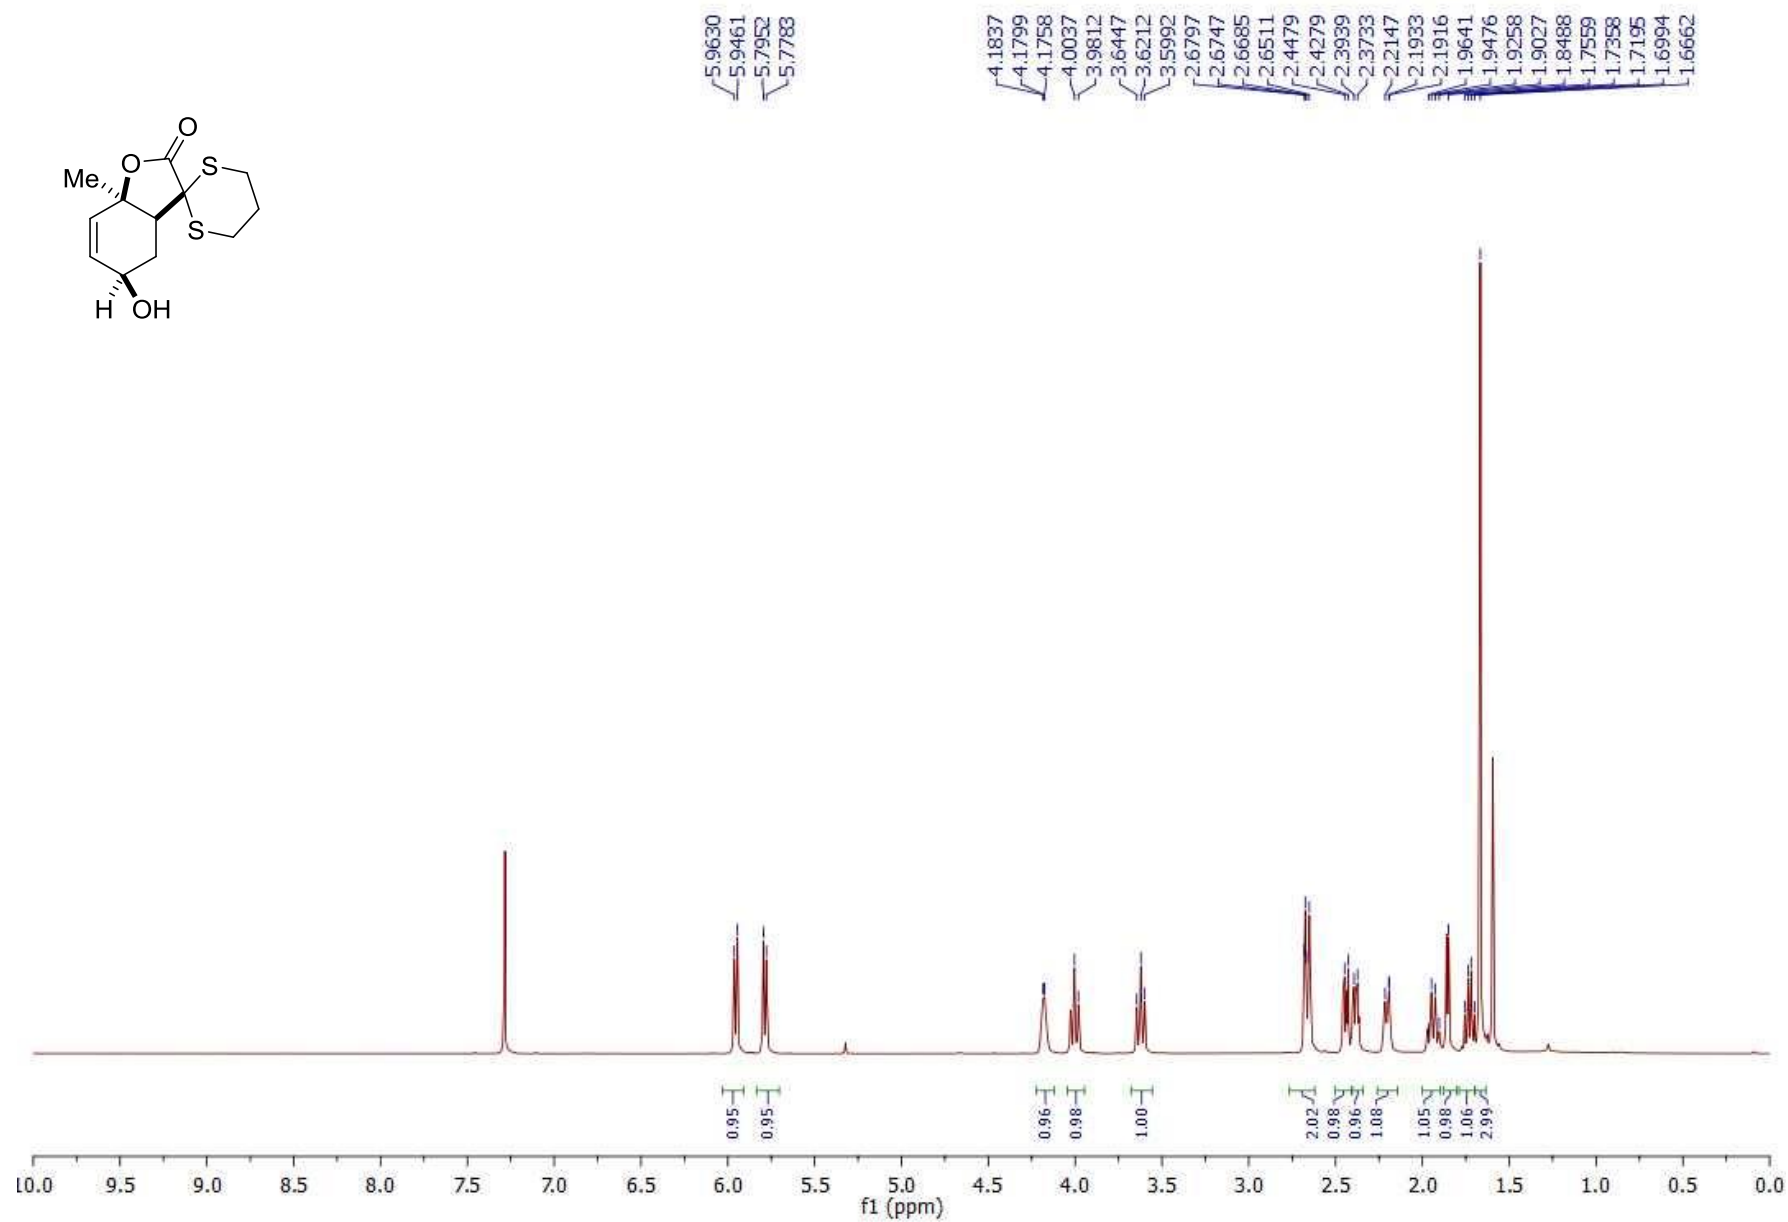

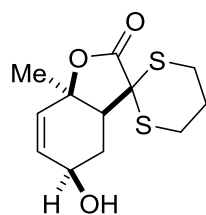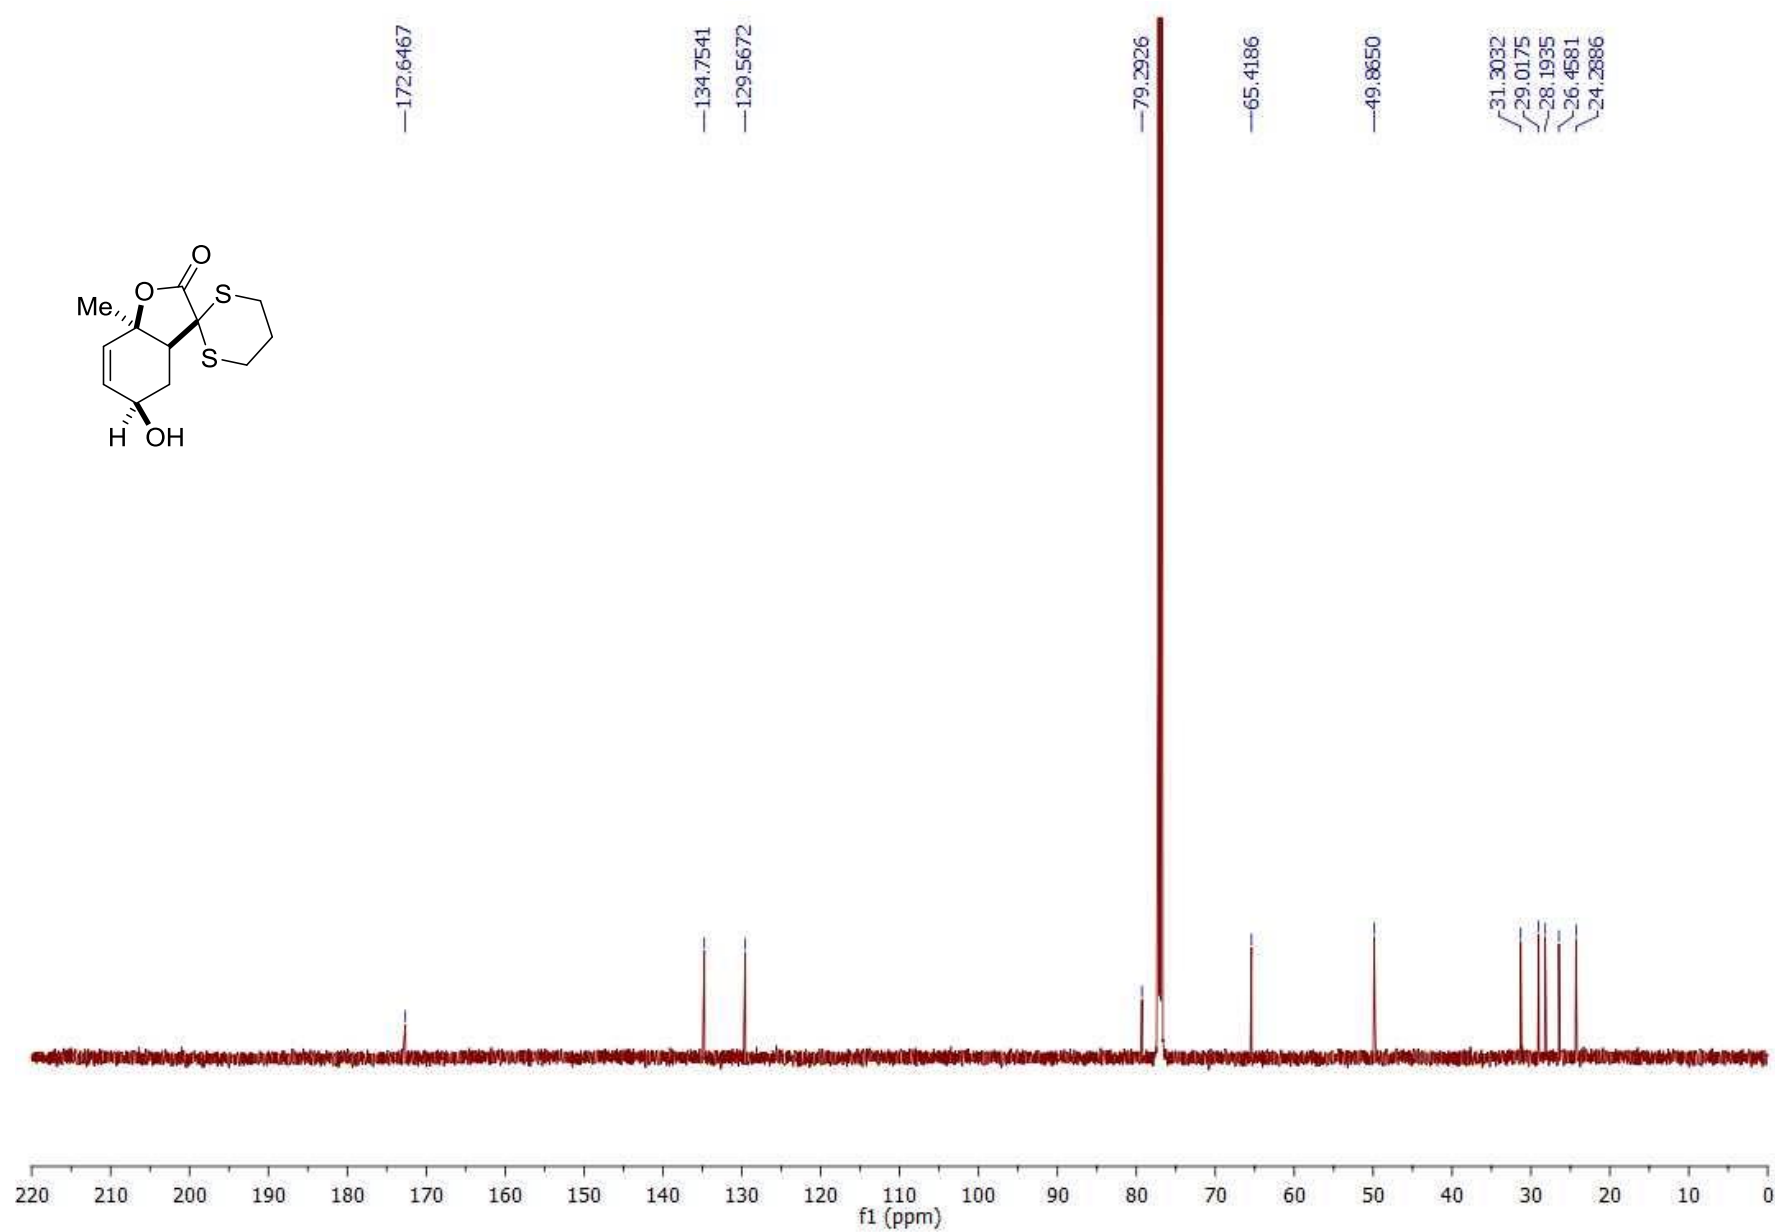



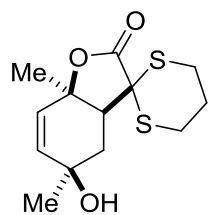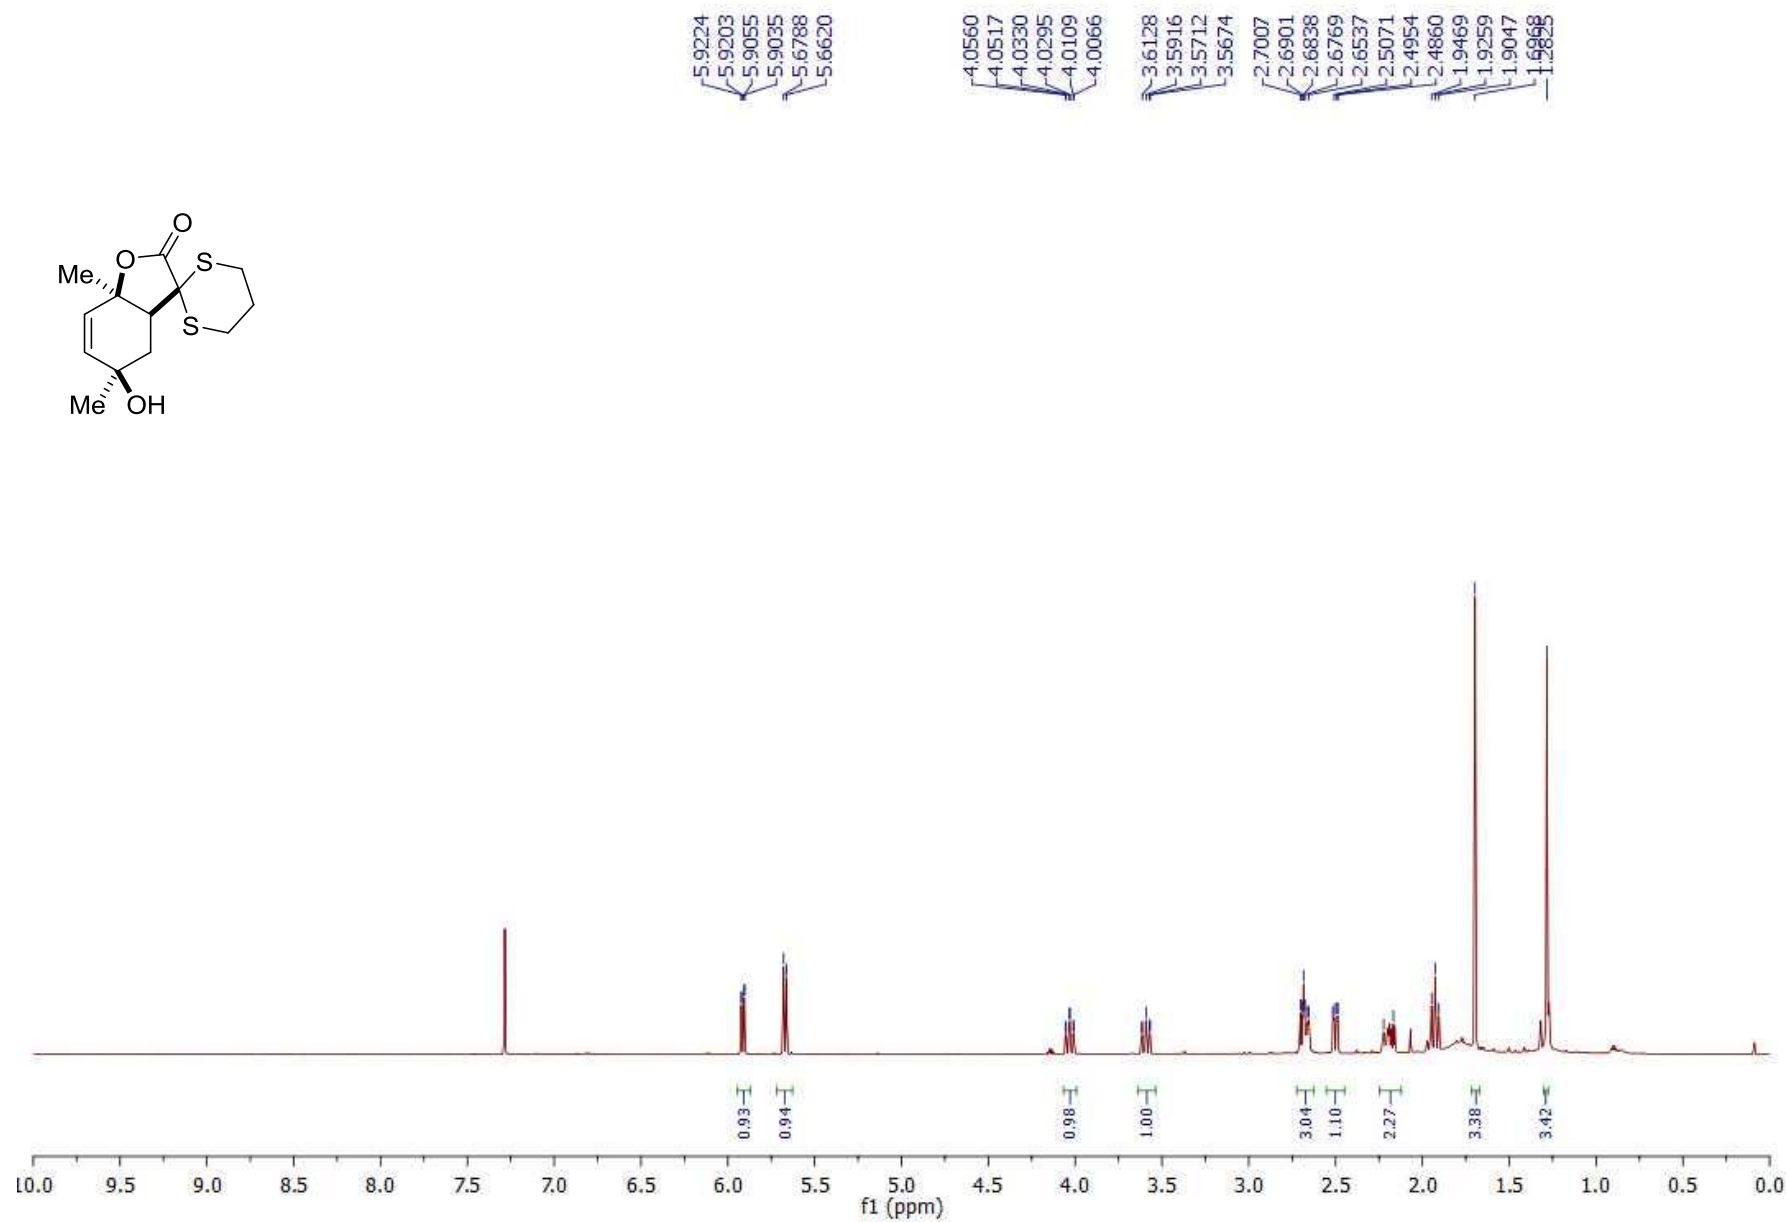

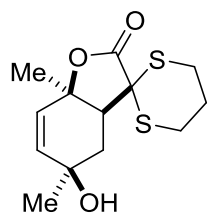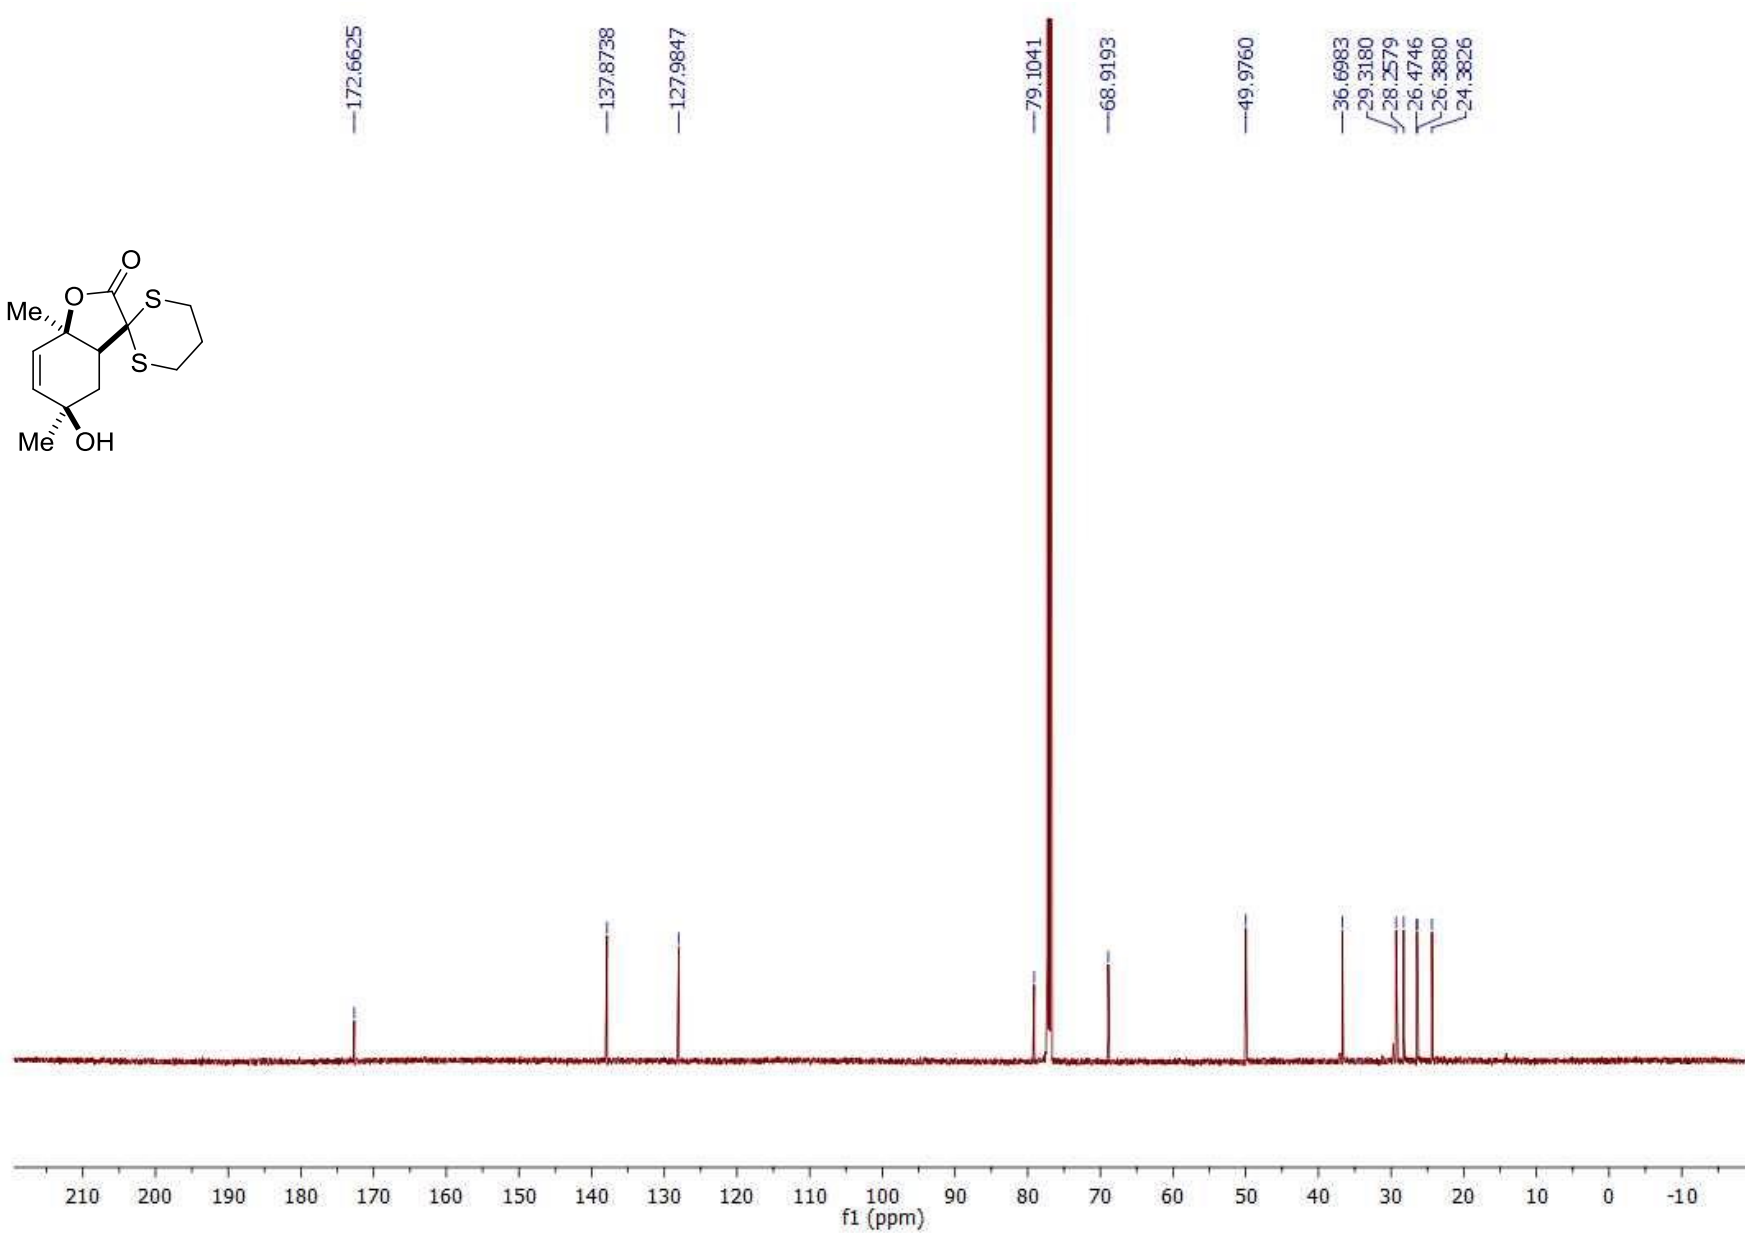

Supplement: Additional file 1 [file 1860-5397-13-75-S1.pdf]
